# Supplementary material
Source: publisher site journal article supplement (https://www.spandidos-publications.com/2607/downloadSupplementary)
Supplement: Supplementary file 1 [file downloadSupplementary]

## Sheet: Table SVI
Table SVI. Differentially expressed genes in high-miR150 group compared with controls.
Name	High-miR150		Control		log(fold-change)	t	P-value	False discovery rate
	Mean	SD	Mean	SD
COL10A1	10.2095	1.79188	3.75524	1.26979	6.45423	34.3784	3.52527e-129	6.22352e-125
NEK2	8.88124	1.20302	4.08191	1.4842	4.79933	33.9218	2.91485e-127	2.57294e-123
MMP11	12.0818	1.63672	6.41795	0.964543	5.66388	33.6932	2.68293e-126	1.57882e-122
LRRC3B	1.082	1.03867	4.77714	1.06069	-3.69514	-31.8119	2.93049e-118	1.29337e-114
KIF4A	8.98344	1.27559	4.44003	1.41973	4.54341	31.1917	1.43547e-115	5.06836e-112
LOC572558	0.716136	0.802535	3.68145	1.03135	-2.96531	-30.9801	1.20017e-114	3.53129e-111
PKMYT1	8.37688	1.2997	3.64533	1.67231	4.73155	30.5514	9.00375e-113	2.27075e-109
FIGF	3.63291	1.82324	9.18002	0.955087	-5.54711	-29.9159	5.63632e-110	1.24379e-106
CPA1	0.905813	1.00784	4.59206	1.3979	-3.68625	-29.9029	6.43062e-110	1.2614e-106
ADAMTS5	7.68255	1.19313	11.2249	0.635585	-3.54234	-29.1346	1.64244e-106	2.89956e-103
SPC25	7.06566	1.02896	3.65518	1.13168	3.41048	29.1022	2.28863e-106	3.67304e-103
CA4	1.84669	2.03862	8.04513	1.44012	-6.19844	-29.0352	4.55038e-106	6.17942e-103
NUF2	8.21795	1.29244	4.07302	1.2508	4.14493	29.038	4.42365e-106	6.17942e-103
UHRF1	8.57423	1.07019	4.78686	1.49192	3.78736	28.8848	2.13272e-105	2.68936e-102
KIAA0101	8.27679	1.09813	4.62232	1.26449	3.65448	28.8669	2.56227e-105	3.01563e-102
ASF1B	9.02753	0.982396	5.82191	1.07051	3.20562	28.7152	1.22028e-104	1.34643e-101
MYOC	1.44161	1.47346	7.16959	2.65979	-5.72798	-28.4612	1.67298e-103	1.73734e-100
CDC25C	6.59155	1.24262	2.64264	1.27164	3.94891	28.4151	2.69235e-103	2.6406e-100
IQGAP3	9.31626	1.33927	5.14165	1.30641	4.17461	28.177	3.15596e-102	2.93239e-99
UBE2C	9.33428	1.48159	4.74608	1.41727	4.5882	28.1153	5.98017e-102	5.2787e-99
UBE2T	8.6878	1.12097	5.38582	0.853723	3.30198	27.8178	1.30738e-100	1.09907e-97
PLK1	9.11356	1.2825	5.29908	1.0511	3.81448	27.7825	1.88621e-100	1.5136e-97
BUB1	8.95912	1.25243	5.11978	1.2292	3.83935	27.6707	6.02871e-100	4.62743e-97
TROAP	7.88376	1.34884	3.82471	1.24347	4.05905	27.5233	2.79697e-99	2.0574e-96
TRPM3	0.789862	0.707873	3.22132	1.0371	-2.43146	-27.4836	4.22849e-99	2.98599e-96
NUSAP1	9.72133	1.06865	6.41707	1.12223	3.30426	27.4683	4.95711e-99	3.36588e-96
PPP1R12B	9.81618	0.742842	11.985	0.594349	-2.16881	-27.3214	2.29318e-98	1.4994e-95
DLGAP5	8.35203	1.27579	4.32719	1.49279	4.02484	27.2508	4.79153e-98	3.02106e-95
TPX2	10.5137	1.28658	6.80855	0.981057	3.70516	27.2006	8.08828e-98	4.92381e-95
FAM13A	8.59985	0.805121	11.0361	0.802348	-2.43623	-27.1827	9.75344e-98	5.73958e-95
PAMR1	6.41684	1.37468	10.26	0.830675	-3.8432	-27.1486	1.39162e-97	7.92507e-95
WDR62	7.77157	1.06714	4.43026	1.2428	3.34131	27.0718	3.10787e-97	1.71457e-94
PTTG1	8.70808	1.17139	5.31107	0.976319	3.39701	27.0081	6.04982e-97	3.23647e-94
MELK	8.55163	1.41591	4.32058	1.39132	4.23104	26.9717	8.84803e-97	4.59421e-94
HJURP	8.16772	1.33107	4.28066	1.17706	3.88706	26.9219	1.49017e-96	7.51641e-94
LYVE1	5.52771	1.47447	10.2075	1.8668	-4.67978	-26.7788	6.67136e-96	3.27156e-93
FOXP3	7.11083	1.12355	3.80897	1.05886	3.30185	26.7488	9.1338e-96	4.35806e-93
KIF20A	9.06382	1.32267	5.03817	1.46651	4.02565	26.682	1.84028e-95	8.54955e-93
CAV1	10.4839	1.06635	13.6604	1.08507	-3.17642	-26.6603	2.30943e-95	1.0454e-92
CDKN3	7.4137	1.08809	4.21995	1.03697	3.19375	26.6523	2.51247e-95	1.10888e-92
CEP68	9.38128	0.486234	10.7432	0.335293	-1.36188	-26.6393	2.88015e-95	1.24015e-92
CDK1	9.77871	1.15928	6.51045	0.884044	3.26826	26.6213	3.47828e-95	1.46204e-92
SPRY2	7.72343	1.00967	10.4094	0.384102	-2.68593	-26.5912	4.76889e-95	1.9579e-92
CCNB2	8.82777	1.22785	5.19817	1.2341	3.6296	26.5407	8.10691e-95	3.25271e-92
CEP55	8.77204	1.29789	5.03348	1.15334	3.73856	26.53	9.06776e-95	3.55738e-92
HMMR	8.12134	1.17071	4.58744	1.30511	3.5339	26.4188	2.91841e-94	1.12003e-91
TACC3	9.85656	0.900871	7.28233	0.780687	2.57424	26.4113	3.15673e-94	1.18572e-91
POC1A	7.88552	0.768714	5.7099	0.629172	2.17562	26.3945	3.7645e-94	1.38455e-91
HSD17B13	2.06461	1.3464	6.53582	2.04704	-4.47121	-26.2345	2.02689e-93	7.30259e-91
NUAK2	7.85567	0.816482	5.53516	0.713001	2.32051	26.2211	2.33299e-93	8.23731e-91
CCL11	4.72624	1.4524	0.851747	0.774418	3.8745	26.1872	3.33376e-93	1.154e-90
BUB1B	8.65782	1.15261	5.22825	1.27925	3.42957	26.0711	1.13316e-92	3.84707e-90
PPAPDC1A	6.23353	1.71184	1.51849	1.308	4.71504	26.0195	1.95112e-92	6.49908e-90
ZWINT	9.5594	0.922563	6.91868	0.874882	2.64072	26.0041	2.29468e-92	7.50191e-90
MESTIT1	1.36745	1.08841	4.55827	1.16253	-3.19081	-25.9366	4.67934e-92	1.50198e-89
SDPR	7.09838	1.63406	11.3977	0.858514	-4.29934	-25.8617	1.03056e-91	3.24884e-89
RRM2	9.97364	1.30895	6.13656	1.42723	3.83708	25.8102	1.77559e-91	5.49934e-89
MME	8.64494	1.48882	12.514	0.668269	-3.86908	-25.8002	1.97331e-91	6.00634e-89
TNS1	11.4234	0.895399	14.1874	1.17235	-2.76406	-25.7356	3.9019e-91	1.16753e-88
NDC80	8.17193	1.29229	4.52589	1.20797	3.64604	25.731	4.09665e-91	1.20537e-88
TK1	10.0281	1.10212	6.87453	1.10142	3.15353	25.7169	4.75598e-91	1.37643e-88
NKAPL	2.87562	0.885524	5.32903	0.754034	-2.45341	-25.6853	6.64057e-91	1.89085e-88
DPP6	1.49584	1.44552	5.48537	1.21344	-3.98953	-25.6834	6.77986e-91	1.89987e-88
CKS2	9.3653	0.966019	6.67707	0.851678	2.68823	25.6475	9.90368e-91	2.73187e-88
IL21R	7.19435	1.30142	3.63547	1.04294	3.55887	25.6368	1.10943e-90	3.01321e-88
KIF2C	9.01257	1.35696	5.21303	1.24868	3.79954	25.6188	1.34109e-90	3.58721e-88
DTL	8.98411	1.06434	5.88381	1.16755	3.1003	25.5956	1.71347e-90	4.51486e-88
MYOM1	4.99551	1.26102	8.76573	1.52289	-3.77022	-25.5889	1.84042e-90	4.77805e-88
CDCA5	9.05146	1.17225	5.86398	0.917504	3.18748	25.5782	2.06045e-90	5.27176e-88
C16orf59	6.89565	1.03119	3.95387	1.04303	2.94178	25.5656	2.35502e-90	5.93936e-88
OIP5	6.36882	1.04146	3.44584	0.978534	2.92297	25.5564	2.5952e-90	6.4529e-88
KIF18B	7.59672	1.39541	3.63419	1.39495	3.96253	25.5329	3.32621e-90	8.15569e-88
ASPM	9.15498	1.39302	5.19658	1.40072	3.9584	25.5162	3.96875e-90	9.59786e-88
GPAM	8.83653	1.00835	12.4333	1.9097	-3.59682	-25.4851	5.51501e-90	1.3157e-87
KIFC1	9.28422	1.19929	5.90892	1.17196	3.3753	25.4257	1.03422e-89	2.43441e-87
ARHGAP20	5.28374	1.27308	8.63887	0.821689	-3.35514	-25.4174	1.13011e-89	2.62512e-87
TDO2	6.03284	1.57567	1.7468	1.30815	4.28604	25.3635	1.99879e-89	4.58269e-87
CCDC64	8.55973	0.924429	5.52616	1.47991	3.03357	25.3579	2.12217e-89	4.80318e-87
WISP1	7.80366	1.23749	4.41515	1.08112	3.38851	25.2961	4.08196e-89	9.1219e-87
CENPF	11.0426	1.20727	7.7307	1.06672	3.31191	25.2892	4.39098e-89	9.68979e-87
ABCA10	4.13115	1.62426	8.2965	0.824356	-4.16535	-25.2694	5.41742e-89	1.18073e-86
TMEM220	5.8282	0.894194	8.10504	0.400935	-2.27684	-25.242	7.24141e-89	1.55902e-86
GTSE1	7.792	1.22483	4.4662	1.04051	3.32579	25.2087	1.03117e-88	2.19329e-86
AURKA	8.91628	1.20786	5.80139	0.690828	3.11489	25.1615	1.70034e-88	3.57355e-86
HIF3A	3.32882	1.75895	7.89733	1.10793	-4.56851	-25.1273	2.44402e-88	5.07609e-86
ADRA1A	1.36752	1.15843	5.02386	1.7267	-3.65634	-25.1252	2.5001e-88	5.13219e-86
CDC20	9.41709	1.39571	5.54607	1.35206	3.87102	25.1106	2.91831e-88	5.92182e-86
CDCA8	8.83784	1.19369	5.70034	0.840356	3.1375	25.0904	3.61616e-88	7.2545e-86
DEPDC1B	6.878	1.20811	3.56066	1.12652	3.31734	25.0514	5.46578e-88	1.08419e-85
LMNB1	10.3039	0.930296	7.69586	0.954733	2.60805	25.0309	6.79722e-88	1.33331e-85
PPAP2B	10.2393	0.728207	12.1859	0.590603	-1.94661	-24.9583	1.4691e-87	2.85005e-85
HSD17B6	6.23235	1.01917	3.46147	0.919316	2.77088	24.9548	1.52528e-87	2.92687e-85
NCAPH	8.31494	1.13881	5.21546	1.04197	3.09948	24.9206	2.19236e-87	4.16171e-85
CAV2	9.05068	1.02284	11.8476	0.958949	-2.79688	-24.9087	2.48729e-87	4.67133e-85
EXO1	7.85849	1.39329	4.07023	1.28308	3.78827	24.8742	3.58947e-87	6.67037e-85
GPRIN1	7.44175	1.0106	4.79151	0.745719	2.65023	24.8676	3.85059e-87	7.08108e-85
ANGPT4	1.111	0.944215	4.02622	1.36912	-2.91522	-24.8282	5.85434e-87	1.06549e-84
CCNB1	9.96104	0.980756	7.43167	0.641226	2.52937	24.8193	6.43446e-87	1.15912e-84
CKAP2L	7.37848	1.30395	3.86982	1.16088	3.50866	24.7744	1.03634e-86	1.84803e-84
B3GALT1	1.13214	1.0017	4.11983	1.32977	-2.98769	-24.7592	1.21831e-86	2.1508e-84
SLC2A4	4.29935	1.39983	8.37983	1.74021	-4.08048	-24.734	1.59199e-86	2.78266e-84
SKA3	7.58379	1.23685	4.24786	1.12951	3.33593	24.7097	2.06278e-86	3.57022e-84
CENPM	7.21675	1.07341	4.01377	1.43903	3.20299	24.6918	2.4947e-86	4.27586e-84
PBK	7.93056	1.33942	4.20021	1.42284	3.73034	24.6839	2.71312e-86	4.60553e-84
C16orf75	8.22257	0.956063	5.61554	0.928554	2.60703	24.6517	3.82048e-86	6.42351e-84
NEIL3	5.80664	1.37166	2.1681	1.16669	3.63854	24.6272	4.9595e-86	8.25991e-84
KIF14	7.65489	1.46616	3.75085	1.29119	3.90405	24.5707	9.04723e-86	1.49271e-83
SCARA5	5.14092	2.06422	10.4165	1.38842	-5.27557	-24.5517	1.10769e-85	1.81066e-83
NCAPG	8.79548	1.20607	5.56097	1.10716	3.2345	24.5435	1.20929e-85	1.9586e-83
RECQL4	8.77784	1.12018	5.72183	1.11751	3.05602	24.5305	1.38876e-85	2.22884e-83
C7orf41	9.4177	0.896553	11.9701	1.05551	-2.55236	-24.5257	1.46161e-85	2.32461e-83
EZH2	8.90188	0.91822	6.4219	0.874922	2.47998	24.5121	1.68835e-85	2.66126e-83
SKA1	7.21985	1.3209	3.81382	0.965233	3.40603	24.5012	1.89668e-85	2.96318e-83
RYR3	3.726	1.30402	7.05541	0.882662	-3.32941	-24.4939	2.04937e-85	3.17365e-83
RAD51	7.52021	1.06636	4.73798	0.853264	2.78223	24.4539	3.13915e-85	4.81901e-83
EPR1	8.54298	1.45462	4.42968	1.69764	4.1133	24.4488	3.31484e-85	5.04484e-83
DMD	7.82445	1.3942	11.2571	0.624533	-3.43265	-24.4433	3.51244e-85	5.29989e-83
FOXM1	9.9031	1.44309	6.13027	1.17825	3.77283	24.4415	3.57991e-85	5.3559e-83
SLC17A7	3.50269	1.1543	6.58617	1.06302	-3.08349	-24.429	4.09085e-85	6.06889e-83
PDE2A	7.05583	1.23115	10.2445	0.949151	-3.1887	-24.4217	4.42326e-85	6.50735e-83
MKI67	10.9692	1.27754	7.46966	1.32823	3.49953	24.4033	5.37842e-85	7.84716e-83
BIRC5	8.5634	1.51826	4.40527	1.6185	4.15813	24.257	2.55832e-84	3.70201e-82
CD300LG	4.78315	2.2234	10.2835	1.2126	-5.5004	-24.2545	2.6255e-84	3.76834e-82
KLHL29	6.25672	1.13618	9.03437	0.512871	-2.77764	-24.2485	2.80069e-84	3.98737e-82
SIK2	9.12282	0.719804	11.2976	1.05112	-2.17482	-24.2075	4.33556e-84	6.12319e-82
LRRC2	3.76069	1.01797	6.52764	1.0585	-2.76695	-24.2008	4.65489e-84	6.52202e-82
LOC286367	4.91852	0.959217	7.44166	0.862552	-2.52315	-24.1533	7.72906e-84	1.0744e-81
MYBL2	9.85307	1.61946	5.6136	1.43076	4.23947	24.1452	8.43015e-84	1.1627e-81
ANLN	9.64759	1.38624	6.05199	1.16452	3.59559	24.1325	9.64397e-84	1.3198e-81
TOP2A	11.3362	1.41138	7.50421	1.48479	3.83198	24.123	1.06789e-83	1.4502e-81
RAD54L	7.34591	1.27626	4.00673	1.12926	3.33918	24.1159	1.15238e-83	1.55298e-81
ATP1A2	4.54117	2.05889	9.86918	1.72193	-5.32801	-24.1066	1.27195e-83	1.70113e-81
TSLP	2.95583	1.47521	6.50096	0.556187	-3.54513	-24.0544	2.2202e-83	2.94703e-81
SGOL1	6.42854	1.3414	2.95453	1.14862	3.47401	24.015	3.38119e-83	4.4546e-81
ERCC6L	7.13321	1.10761	4.28889	0.906001	2.84433	23.9868	4.56995e-83	5.97614e-81
H2AFY	12.2273	0.434833	11.1283	0.301474	1.09903	23.9792	4.9548e-83	6.43176e-81
TPM3	13.4741	0.411646	12.2479	0.586771	1.22616	23.9628	5.90141e-83	7.60463e-81
NAALAD2	3.75784	1.03162	6.703	1.32848	-2.94516	-23.9407	7.46905e-83	9.55497e-81
AURKB	7.70738	1.46226	3.85945	1.3863	3.84793	23.9351	7.93662e-83	1.00801e-80
SPTBN1	12.4603	0.627894	14.3137	0.889259	-1.85348	-23.9046	1.09848e-82	1.38518e-80
SPAG5	9.44881	1.12207	6.64749	0.774692	2.80132	23.8854	1.34874e-82	1.6887e-80
CDC45	7.45757	1.35834	3.71914	1.57843	3.73843	23.8223	2.64624e-82	3.28991e-80
CXCL11	8.34915	1.69641	4.07759	1.2952	4.27156	23.7891	3.77509e-82	4.66052e-80
KIF11	9.58633	1.01524	6.96992	0.888784	2.61641	23.7867	3.87137e-82	4.74619e-80
BTNL9	6.46491	1.5786	10.4584	1.24532	-3.99348	-23.7818	4.08042e-82	4.96798e-80
PAQR4	10.0302	1.01572	7.48618	0.74594	2.54407	23.7669	4.78581e-82	5.7869e-80
GLYAT	2.0488	1.91094	7.51926	2.54734	-5.47045	-23.7533	5.53491e-82	6.64716e-80
FHL1	9.17646	1.44147	13.301	1.91875	-4.12456	-23.7472	5.90368e-82	7.04213e-80
RAG1AP1	10.6737	0.697304	8.95109	0.454037	1.72256	23.7408	6.32315e-82	7.49187e-80
ESPL1	8.33149	1.17848	5.15211	1.28738	3.17938	23.7376	6.54628e-82	7.70454e-80
LEPR	7.54637	1.21231	10.6295	1.00328	-3.08311	-23.7148	8.34481e-82	9.75624e-80
ITIH5	8.33071	1.50041	12.1409	1.23467	-3.81016	-23.7115	8.64438e-82	1.004e-79
ADAMTS14	6.51443	1.20376	3.2241	1.38915	3.29034	23.7003	9.74421e-82	1.12434e-79
FAM54A	6.25785	1.22924	3.24273	0.783295	3.01511	23.6865	1.12961e-81	1.29495e-79
PAFAH1B3	9.99332	0.856703	7.54603	1.14253	2.44729	23.6651	1.41983e-81	1.61714e-79
IGFBP6	7.04023	1.23945	10.2713	1.18993	-3.23106	-23.6417	1.82374e-81	2.06387e-79
AQP7P1	2.36405	1.76588	7.20445	2.08237	-4.8404	-23.6345	1.96971e-81	2.21486e-79
HPSE2	1.75818	1.48846	5.5358	1.25276	-3.77763	-23.6083	2.60727e-81	2.91321e-79
C6orf129	8.32286	0.769024	6.4272	0.523655	1.89566	23.5852	3.33765e-81	3.70584e-79
GINS1	8.49523	0.980937	6.02398	0.795367	2.47125	23.5563	4.54763e-81	5.01775e-79
PITX1	8.70252	1.75683	4.06827	1.8119	4.63426	23.5551	4.60566e-81	5.05021e-79
MMP13	7.50794	2.36637	1.69901	1.62967	5.80893	23.5184	6.82031e-81	7.43246e-79
LMOD1	8.49936	1.2894	11.5547	0.600973	-3.05537	-23.4679	1.17057e-80	1.2678e-78
KIF23	9.02718	1.09959	6.20811	1.01365	2.81907	23.4379	1.61334e-80	1.7367e-78
DST	11.5839	1.1064	14.2866	0.7554	-2.70262	-23.4005	2.40677e-80	2.5751e-78
TNXB	8.70943	1.62356	12.7597	1.30383	-4.05023	-23.3878	2.75787e-80	2.93298e-78
GPR146	6.50749	0.941246	9.06744	1.11603	-2.55995	-23.3865	2.79694e-80	2.95672e-78
HLF	6.62515	1.52445	10.2149	0.682849	-3.58971	-23.3815	2.95139e-80	3.10142e-78
CXCL10	10.1151	1.66036	6.00893	1.27602	4.10618	23.3417	4.51708e-80	4.71862e-78
SPC24	4.46719	1.2944	1.32867	0.862278	3.13852	23.3038	6.77773e-80	7.03847e-78
ADAM8	8.77779	1.06689	6.05679	0.986541	2.721	23.2997	7.08294e-80	7.31241e-78
SHCBP1	7.81978	1.12742	4.94216	1.05188	2.87763	23.2798	8.76759e-80	8.99902e-78
NPR1	7.35611	1.18596	10.5329	1.3597	-3.17681	-23.2674	1.00101e-79	1.0215e-77
E2F8	6.86152	1.41831	3.18413	1.43278	3.67738	23.2582	1.10455e-79	1.12068e-77
EZH1	9.33585	0.597794	10.8111	0.451897	-1.47523	-23.2498	1.20876e-79	1.21939e-77
CDCA3	7.87791	1.31879	4.6805	0.902466	3.19741	23.2298	1.49671e-79	1.5013e-77
FAM83D	8.37329	1.45461	4.81321	1.07522	3.56008	23.2231	1.60866e-79	1.60448e-77
HOXA4	4.69359	1.15156	7.37905	0.484125	-2.68546	-23.2176	1.70546e-79	1.69147e-77
HEPACAM	2.20682	1.78654	6.9234	1.96188	-4.71658	-23.2116	1.81872e-79	1.79373e-77
ANGPTL7	1.81782	1.94794	6.76944	1.82052	-4.95163	-23.1962	2.14451e-79	2.10328e-77
APOB	2.07648	1.71776	6.89351	2.34988	-4.81703	-23.0586	9.37177e-79	9.14084e-77
PYCR1	11.0682	0.871612	8.57842	1.25268	2.48983	23.0427	1.11068e-78	1.07736e-76
NTRK2	8.91015	1.78696	13.0054	0.599294	-4.09523	-23.0414	1.12719e-78	1.0874e-76
CAT	10.6084	0.621303	12.4193	0.937963	-1.81093	-23.0343	1.2154e-78	1.16612e-76
LOC728264	7.01808	1.48228	10.6671	1.21483	-3.64902	-23.0013	1.73203e-78	1.65283e-76
ESCO2	6.94486	1.13381	4.02265	1.17016	2.92221	22.9949	1.85452e-78	1.7602e-76
TNFRSF9	4.88923	1.37521	1.57836	0.9668	3.31088	22.993	1.89171e-78	1.7859e-76
EBF1	7.5626	1.0491	10.3513	1.21977	-2.78868	-22.9925	1.90289e-78	1.7869e-76
HOXA5	4.4556	1.29309	7.45268	0.58764	-2.99708	-22.9883	1.98952e-78	1.85836e-76
ASPA	2.93026	1.34807	6.39594	1.38992	-3.46567	-22.9503	2.99183e-78	2.77988e-76
SORBS1	9.6365	1.26978	13.025	1.50887	-3.38852	-22.9488	3.04095e-78	2.81073e-76
GSN	12.9897	0.802548	15.1721	1.01304	-2.18247	-22.9319	3.64474e-78	3.35126e-76
PALMD	8.93587	1.03307	11.5438	0.984936	-2.60791	-22.9172	4.26377e-78	3.90013e-76
HEPN1	2.08105	1.69809	6.59049	2.01409	-4.50944	-22.8582	8.02564e-78	7.30334e-76
TGFBR3	9.22787	1.41228	12.4735	0.613141	-3.24565	-22.8546	8.34649e-78	7.55635e-76
LIFR	9.09243	1.2788	12.0556	0.652666	-2.96313	-22.8132	1.30037e-77	1.17126e-75
CCNA2	8.90822	1.24597	5.89897	0.951514	3.00926	22.8054	1.4142e-77	1.26732e-75
KIF15	7.73202	1.23808	4.70549	1.02664	3.02653	22.7888	1.68992e-77	1.50676e-75
ABCB5	2.27991	1.61932	6.29975	1.47799	-4.01984	-22.7553	2.42126e-77	2.14799e-75
LRRTM2	3.26736	1.10278	5.90134	0.791276	-2.63398	-22.7399	2.85458e-77	2.51974e-75
PRRG3	1.15152	1.12336	3.85251	0.84826	-2.70099	-22.7342	3.03567e-77	2.66626e-75
HN1	11.0531	0.906452	8.90242	0.617083	2.1507	22.7212	3.48982e-77	3.04996e-75
CLEC3B	7.10271	1.40177	10.72	1.53123	-3.6173	-22.7125	3.8294e-77	3.33026e-75
LDB2	7.88419	0.904056	10.0478	0.664172	-2.16356	-22.6974	4.50444e-77	3.89811e-75
SH3D19	9.94663	0.827093	12.0252	0.806369	-2.07854	-22.6874	5.01501e-77	4.31878e-75
COL11A1	10.181	2.30184	4.72924	1.61182	5.45174	22.6443	7.96349e-77	6.82464e-75
CRIM1	10.8187	0.930044	12.9517	0.449664	-2.13297	-22.6385	8.47371e-77	7.22681e-75
NACC1	11.0077	0.560158	9.60816	0.530064	1.39957	22.6361	8.68983e-77	7.37549e-75
DCT	0.776818	0.899084	3.46305	1.50669	-2.68623	-22.6286	9.41968e-77	7.9567e-75
CCR8	4.2167	1.34423	1.06317	0.870789	3.15353	22.6193	1.04152e-76	8.7557e-75
MASP1	2.75025	1.63616	6.73999	1.40924	-3.98975	-22.595	1.35127e-76	1.13058e-74
C1QTNF9	2.13823	1.33315	5.26353	0.86703	-3.1253	-22.5929	1.38143e-76	1.15036e-74
ABCA9	6.05105	1.62199	9.90047	1.1804	-3.84943	-22.5705	1.75792e-76	1.45701e-74
PRC1	10.0664	1.0912	7.53297	0.652064	2.53339	22.5563	2.04757e-76	1.68915e-74
MAMDC2	5.95287	1.75413	9.88856	0.596949	-3.93569	-22.5471	2.26006e-76	1.85577e-74
DENND2A	5.95262	1.04661	8.49452	0.891267	-2.54189	-22.5291	2.74187e-76	2.24097e-74
CXCL9	11.472	1.70839	7.4057	1.28917	4.06632	22.5253	2.85536e-76	2.32297e-74
SLC35A2	10.137	0.552603	8.82754	0.391637	1.30949	22.4999	3.74938e-76	3.03631e-74
GDF10	3.91556	1.59621	7.76742	1.3382	-3.85187	-22.4644	5.48956e-76	4.42524e-74
RABIF	8.95829	0.478751	7.84108	0.295377	1.11721	22.4596	5.78068e-76	4.63873e-74
SDS	7.78717	1.16297	4.59722	1.60838	3.18995	22.4557	6.02821e-76	4.81547e-74
GIPC2	4.65238	1.25869	7.51537	0.624245	-2.86299	-22.4377	7.31032e-76	5.81335e-74
ADH4	1.01945	1.08736	4.17129	1.73825	-3.15185	-22.4209	8.75729e-76	6.93279e-74
AQP7P3	0.696985	0.904978	3.827	2.04291	-3.13002	-22.4191	8.9293e-76	7.00613e-74
TNMD	2.5974	1.85801	7.13904	1.69202	-4.54164	-22.4195	8.89141e-76	7.00613e-74
LOC283392	2.09191	1.89003	7.11631	2.39936	-5.0244	-22.4158	9.2489e-76	7.22478e-74
CTHRC1	10.7165	0.936973	8.1916	1.23559	2.52485	22.4151	9.31597e-76	7.24512e-74
ANGPTL1	5.34062	1.45998	8.83948	1.19814	-3.49885	-22.3862	1.27054e-75	9.8378e-74
TIGIT	7.26657	1.3056	4.12293	1.10128	3.14363	22.3842	1.29766e-75	1.00038e-73
ADRB2	5.66756	1.12043	8.32883	0.87553	-2.66126	-22.3462	1.95245e-75	1.49863e-73
CACHD1	7.86708	1.10945	10.347	0.425597	-2.47995	-22.3435	2.00953e-75	1.53577e-73
IGSF10	6.29126	1.51976	9.79231	0.938409	-3.50105	-22.3274	2.38806e-75	1.81719e-73
ATOH8	5.3104	1.45497	8.73117	1.07241	-3.42076	-22.3176	2.65301e-75	2.01014e-73
DPP3	10.3888	0.639518	8.8678	0.509698	1.52098	22.2456	5.7515e-75	4.33919e-73
CENPA	7.06152	1.45941	3.64069	1.08449	3.42083	22.2253	7.14816e-75	5.36599e-73
RNASEH2A	9.24447	0.741133	7.52003	0.510828	1.72444	22.225	7.1733e-75	5.36599e-73
CAPN11	3.55536	1.25833	6.49571	0.921714	-2.94036	-22.1937	1.00358e-74	7.4756e-73
BAI3	1.67897	1.07504	4.1574	0.705881	-2.47843	-22.1829	1.12701e-74	8.35977e-73
PAPPA2	1.60133	1.36953	5.00347	1.41925	-3.40214	-22.1505	1.59716e-74	1.17976e-72
RPLP0P2	5.85834	0.914795	3.72778	0.661391	2.13056	22.1371	1.84274e-74	1.35549e-72
NIPSNAP3B	4.73711	0.971257	7.28171	1.22177	-2.54459	-22.1317	1.95425e-74	1.43155e-72
FXYD1	4.27708	2.00813	8.76278	0.949169	-4.4857	-22.1188	2.24438e-74	1.63728e-72
CCNF	9.24366	0.751339	7.43668	0.668687	1.80699	22.1018	2.69392e-74	1.95714e-72
METTL7A	10.3249	0.79169	12.1478	0.527642	-1.8229	-22.0893	3.08105e-74	2.22921e-72
PLSCR4	8.35954	1.02258	10.6969	0.657825	-2.33731	-22.0386	5.30821e-74	3.82494e-72
MAZ	12.2943	0.587305	10.9156	0.454853	1.37869	22.0354	5.49616e-74	3.94428e-72
ANKRD29	5.36151	1.26499	8.14207	0.462908	-2.78056	-22.0202	6.47373e-74	4.62701e-72
TUBA1C	12.08	0.718576	10.4017	0.546769	1.67827	22.0159	6.78e-74	4.82638e-72
SCN4B	6.82048	1.44607	9.97837	0.437197	-3.15789	-22.0142	6.90248e-74	4.89383e-72
FAM122A	8.72366	0.442991	9.76147	0.3331	-1.03781	-22.0013	7.9274e-74	5.59801e-72
ACVR1C	4.93731	1.64126	9.36468	2.30216	-4.42737	-21.9823	9.7216e-74	6.83765e-72
AQPEP	2.89602	1.51743	7.15903	2.37101	-4.26301	-21.9504	1.36919e-73	9.59196e-72
KCNJ16	2.27931	1.94066	6.78303	1.47667	-4.50371	-21.939	1.54854e-73	1.08055e-71
BMP8A	7.70095	1.01544	5.36561	0.7246	2.33535	21.9058	2.21183e-73	1.53731e-71
ACACB	8.61904	1.35321	12.0169	1.53192	-3.39781	-21.8913	2.58408e-73	1.789e-71
TGFBR2	11.0978	0.905864	13.2069	0.709639	-2.10917	-21.8811	2.88313e-73	1.98824e-71
FANCI	9.9841	0.819822	8.06949	0.653442	1.91461	21.8793	2.94076e-73	2.02009e-71
GJB2	8.8618	1.69454	5.02223	1.09435	3.83957	21.8621	3.53834e-73	2.42116e-71
GABRD	5.41179	1.26599	2.44081	1.05554	2.97097	21.8583	3.68432e-73	2.51131e-71
UBE2S	8.69217	1.09587	6.20362	0.720836	2.48856	21.8471	4.15553e-73	2.8216e-71
MATN2	8.93234	1.41026	11.9884	0.424959	-3.05607	-21.8461	4.19939e-73	2.84046e-71
NR3C1	10.1352	0.740027	11.8528	0.574863	-1.71762	-21.8172	5.73053e-73	3.86133e-71
CFL2	8.3067	0.673135	10.0928	0.916201	-1.78608	-21.8034	6.64339e-73	4.45941e-71
C21orf34	4.24853	1.29928	7.08792	0.541215	-2.83939	-21.7738	9.13312e-73	6.08787e-71
HSPB6	7.62968	1.81309	12.0203	1.81534	-4.39064	-21.7734	9.17284e-73	6.08787e-71
LRRN4CL	4.96422	1.55596	8.52977	1.13953	-3.56555	-21.7735	9.16589e-73	6.08787e-71
NR3C2	6.71258	1.24332	9.41687	0.480165	-2.70429	-21.7423	1.28158e-72	8.47377e-71
PALM2-AKAP2	9.94917	0.712925	11.7898	0.906605	-1.84062	-21.7079	1.8543e-72	1.22148e-70
FGF2	7.14254	1.45416	10.4041	0.918633	-3.26155	-21.6865	2.33335e-72	1.53134e-70
GPRASP1	6.89213	1.04949	9.19435	0.509643	-2.30221	-21.6578	3.17735e-72	2.07751e-70
ADAMDEC1	7.6471	1.80146	3.23713	1.93477	4.40998	21.6457	3.61955e-72	2.35198e-70
AOC3	9.31017	1.32213	12.7263	1.71046	-3.41609	-21.6455	3.62377e-72	2.35198e-70
ADCYAP1R1	1.57048	1.38993	4.86686	1.31013	-3.29638	-21.5952	6.22724e-72	4.02695e-70
MAP1LC3C	2.72802	1.36743	6.05234	1.44103	-3.32432	-21.5896	6.61016e-72	4.25897e-70
SYNM	9.70652	1.73829	13.526	0.919625	-3.81943	-21.5879	6.73071e-72	4.32087e-70
CDC14B	7.73558	0.86564	9.66919	0.55018	-1.93361	-21.5506	1.00553e-71	6.43176e-70
GPRASP2	7.45636	0.810106	9.21765	0.374115	-1.76129	-21.5062	1.62028e-71	1.03265e-69
MOCS1	8.16411	0.812786	10.1962	0.962283	-2.03209	-21.4957	1.81335e-71	1.15154e-69
TCEAL7	4.56672	1.17931	7.15338	0.6391	-2.58666	-21.4946	1.83466e-71	1.1609e-69
SH3BGRL2	8.20249	1.0728	10.5136	0.432587	-2.31113	-21.4855	2.02421e-71	1.27627e-69
LPL	9.08558	1.72399	13.3545	1.99556	-4.26888	-21.4627	2.58448e-71	1.62371e-69
KCNIP2	5.52054	1.76003	10.0753	2.35047	-4.55474	-21.4581	2.71653e-71	1.70062e-69
CENPE	8.52484	1.23817	5.76599	0.816678	2.75885	21.4369	3.4106e-71	2.12759e-69
DEPDC1	7.87894	1.46988	4.53198	1.14877	3.34696	21.4341	3.51461e-71	2.18475e-69
IL4I1	8.03756	1.32754	5.03201	0.997863	3.00556	21.429	3.71261e-71	2.29974e-69
LHFP	9.26363	0.942114	11.3741	0.653658	-2.11043	-21.4062	4.74456e-71	2.92869e-69
RELT	7.74104	0.796545	5.83445	0.812517	1.90659	21.3876	5.79456e-71	3.56436e-69
HSPB7	5.24706	1.66678	9.67977	2.42274	-4.43271	-21.3868	5.84304e-71	3.5817e-69
MAB21L1	4.06891	1.45493	7.23633	0.783677	-3.16742	-21.3543	8.28704e-71	5.06226e-69
ADH1A	2.32303	1.89473	6.94963	2.12683	-4.6266	-21.346	9.06149e-71	5.51626e-69
BGN	13.5813	0.946026	11.3197	0.972819	2.26162	21.3364	1.00439e-70	6.09332e-69
PPARG	7.32313	1.11703	10.2025	1.49877	-2.87938	-21.3261	1.12253e-70	6.78672e-69
TTK	8.12534	1.35748	4.96862	1.23781	3.15672	21.3145	1.2711e-70	7.65867e-69
TMEM206	8.20319	0.656643	6.74046	0.446472	1.46272	21.2934	1.5944e-70	9.57398e-69
STAT5B	10.5918	0.575812	11.8619	0.35423	-1.27009	-21.2864	1.71874e-70	1.02856e-68
GABARAPL1	9.75299	0.623957	11.2099	0.575293	-1.45687	-21.2852	1.74172e-70	1.0388e-68
SLC7A14	0.722896	0.828708	2.88419	1.15395	-2.16129	-21.2794	1.85454e-70	1.10236e-68
RTKN2	7.61616	0.942228	5.3615	0.996672	2.25467	21.2122	3.81729e-70	2.26142e-68
ALDH1A2	5.11929	1.54657	8.45666	0.813248	-3.33737	-21.2079	3.9993e-70	2.36133e-68
CHL1	6.67871	1.70129	10.3517	0.912863	-3.67296	-21.1882	4.94237e-70	2.89876e-68
TRIM59	8.22984	0.796199	6.25011	0.971419	1.97974	21.1877	4.96611e-70	2.90304e-68
EFHA2	4.59498	1.2185	7.23602	0.692684	-2.64104	-21.1591	6.75055e-70	3.93314e-68
CD34	10.2847	0.836135	12.2528	0.834033	-1.96809	-21.1441	7.93113e-70	4.6058e-68
C2orf88	5.76161	1.19901	8.37839	0.739918	-2.61678	-21.1436	7.97679e-70	4.61712e-68
DNAJC18	6.73782	0.595553	8.03976	0.359898	-1.30193	-21.1407	8.23092e-70	4.73318e-68
NDRG2	10.305	1.15664	12.8134	0.667333	-2.50838	-21.141	8.20518e-70	4.73318e-68
TOR3A	10.5829	0.474086	9.53251	0.319731	1.05041	21.1203	1.02521e-69	5.87632e-68
GPIHBP1	5.22409	1.78537	9.11477	1.11804	-3.89068	-21.0955	1.33701e-69	7.63868e-68
COL25A1	2.84711	1.34994	5.86344	1.03469	-3.01633	-21.0906	1.40943e-69	8.02646e-68
EBF3	5.99358	1.15735	8.68274	1.10665	-2.68916	-21.0871	1.46464e-69	8.31407e-68
F8	8.39787	0.765851	10.1937	0.760098	-1.79586	-21.0789	1.59854e-69	9.04509e-68
POLQ	7.20659	1.2597	4.3867	0.982629	2.81988	21.0718	1.72586e-69	9.73428e-68
RDH5	5.04151	1.54337	8.89261	1.95029	-3.8511	-21.067	1.81617e-69	1.02111e-67
C4orf49	2.55539	1.04115	5.00289	1.05944	-2.4475	-21.0381	2.47756e-69	1.38853e-67
TRIP13	8.54696	1.13747	6.06728	0.729333	2.47967	21.0338	2.59668e-69	1.45069e-67
PYGM	3.65144	1.18413	6.8521	1.8669	-3.20066	-21.0333	2.60994e-69	1.4535e-67
ANXA1	11.5062	0.987285	13.6894	0.711692	-2.18317	-21.0326	2.62876e-69	1.45937e-67
BCL2L2	9.76587	0.483957	10.8827	0.44222	-1.11685	-21.0171	3.10674e-69	1.71932e-67
KIF18A	7.38237	1.16667	4.73647	1.00225	2.6459	21.0115	3.29773e-69	1.81932e-67
HOXA6	2.18448	1.26243	4.94414	0.841906	-2.75966	-21.0058	3.50794e-69	1.92926e-67
ADAM19	9.11299	0.926024	7.01266	0.796428	2.10033	20.9943	3.96924e-69	2.17618e-67
PPP4C	11.1122	0.578624	9.84394	0.382697	1.26825	20.9935	4.00343e-69	2.18813e-67
CD80	5.25547	1.16743	2.62429	0.973428	2.63118	20.9885	4.22237e-69	2.30067e-67
SCN2B	3.25917	1.7785	7.04854	0.930903	-3.78937	-20.951	6.31958e-69	3.4328e-67
KCTD5	9.89411	0.501583	8.8132	0.280786	1.08092	20.9378	7.2802e-69	3.94247e-67
CNIH2	5.92081	1.50102	2.64859	1.01314	3.27222	20.9259	8.27751e-69	4.46884e-67
GCOM1	7.0755	1.33658	10.1784	1.32239	-3.10292	-20.9207	8.74954e-69	4.70928e-67
C9orf125	4.73621	1.05837	7.03888	0.701808	-2.30267	-20.9104	9.77647e-69	5.24601e-67
GALNTL2	6.87566	1.55158	10.3883	1.37163	-3.51261	-20.8771	1.39778e-68	7.47768e-67
KLF15	4.85611	1.48858	8.20268	1.2664	-3.34657	-20.874	1.44532e-68	7.70868e-67
CCDC46	6.54658	0.901633	8.48852	0.549043	-1.94193	-20.8731	1.45955e-68	7.76112e-67
MAD2L1	8.72969	1.01587	6.52619	0.675789	2.2035	20.8365	2.16164e-68	1.14599e-66
PPAP2A	9.41855	0.784049	11.1822	0.670367	-1.76361	-20.8263	2.41431e-68	1.27612e-66
MYH11	9.44947	1.93326	13.5267	0.956059	-4.07723	-20.8224	2.51547e-68	1.32561e-66
SCN3A	3.65779	1.54786	6.99323	0.988573	-3.33544	-20.8134	2.77196e-68	1.45643e-66
HBB	6.32169	1.71023	10.6612	2.35675	-4.33949	-20.8101	2.87085e-68	1.50391e-66
E2F1	8.55534	1.19576	5.94397	0.85397	2.61137	20.8087	2.91412e-68	1.52207e-66
C1QTNF9B	1.86572	1.04349	4.21721	0.914535	-2.35149	-20.797	3.30599e-68	1.72165e-66
LOC90586	1.20117	0.788703	3.31698	1.25217	-2.11581	-20.7925	3.46949e-68	1.80148e-66
SLC20A1	10.6471	0.485601	9.54495	0.430246	1.10211	20.7907	3.53811e-68	1.83173e-66
CHRDL1	7.98225	1.90711	12.2094	1.53268	-4.22717	-20.7816	3.90155e-68	2.01397e-66
VIT	4.85093	1.89395	8.81185	0.841565	-3.96092	-20.7811	3.91991e-68	2.01756e-66
DLGAP2	1.69223	1.07932	4.01334	0.690501	-2.32112	-20.7513	5.39973e-68	2.77113e-66
SSTR1	2.60857	1.47751	5.71359	0.725563	-3.10502	-20.7508	5.42782e-68	2.77747e-66
CIT	8.71383	0.94937	6.59753	0.793277	2.1163	20.7385	6.19887e-68	3.16286e-66
FAM64A	6.78429	1.43711	3.53987	1.2966	3.24443	20.7371	6.28919e-68	3.19969e-66
ZBTB4	10.9072	0.528969	12.0244	0.267809	-1.11715	-20.6903	1.03996e-67	5.27573e-66
TSTA3	11.0268	0.832238	9.2373	0.542061	1.78951	20.6867	1.08096e-67	5.46797e-66
IFI30	12.1184	0.922363	9.88451	1.1191	2.2339	20.6839	1.11436e-67	5.62086e-66
FMO2	8.11383	1.76289	11.7889	0.803731	-3.67506	-20.6836	1.11785e-67	5.62236e-66
KANK1	9.44655	0.945564	11.4893	0.64705	-2.0427	-20.6785	1.18105e-67	5.92336e-66
SEMA6D	6.42471	1.31172	9.19621	0.737828	-2.7715	-20.6484	1.63081e-67	8.1559e-66
GNG11	8.80273	0.900616	10.8506	0.856097	-2.04788	-20.6456	1.68147e-67	8.38551e-66
CDO1	5.81279	1.63415	9.45179	1.40587	-3.63899	-20.6382	1.82105e-67	9.03057e-66
TIMELESS	9.93632	0.668331	8.50968	0.409262	1.42664	20.6384	1.81671e-67	9.03057e-66
SEMA3G	8.48664	1.26337	11.3136	1.11605	-2.82691	-20.6302	1.98316e-67	9.80693e-66
APCDD1	8.26744	1.16574	10.7445	0.709569	-2.47707	-20.6123	2.40419e-67	1.18558e-65
SSPN	9.13558	0.894439	11.0134	0.468411	-1.87781	-20.6072	2.5387e-67	1.24842e-65
HAGHL	6.83889	1.59066	3.3474	1.26605	3.49149	20.6066	2.55517e-67	1.25303e-65
HSPB2	5.69603	1.23888	8.3801	0.900068	-2.68407	-20.5991	2.76927e-67	1.35426e-65
ALDH1L1	4.25929	2.17351	9.11092	1.92375	-4.85163	-20.5868	3.16009e-67	1.54111e-65
MAOA	7.70779	1.81068	11.6733	1.4316	-3.96554	-20.5849	3.22555e-67	1.5687e-65
FOXO1	9.24537	0.775276	10.9651	0.655971	-1.7197	-20.5734	3.65036e-67	1.77042e-65
CASP12	1.0877	0.807815	2.94269	0.814994	-1.85499	-20.5717	3.71811e-67	1.79834e-65
KLB	4.77625	1.46081	8.60802	2.26389	-3.83177	-20.5634	4.06425e-67	1.96039e-65
PDGFD	8.31488	1.16572	10.7309	0.524806	-2.41605	-20.5619	4.13255e-67	1.9879e-65
RUSC1	10.3039	0.616787	9.01749	0.295068	1.28645	20.5452	4.94411e-67	2.37183e-65
CCDC50	10.4536	0.491872	11.6074	0.536431	-1.1538	-20.5434	5.04132e-67	2.41191e-65
AQP7	4.46486	2.35471	9.70495	2.07703	-5.24009	-20.5382	5.32885e-67	2.54258e-65
NUP210	11.2783	0.769537	9.20459	1.27155	2.07368	20.5273	5.99252e-67	2.85154e-65
AMOTL2	10.2794	0.721148	11.8582	0.569347	-1.57875	-20.5247	6.15989e-67	2.9233e-65
LOC134466	3.99542	1.14262	6.42857	0.748679	-2.43316	-20.4982	8.18858e-67	3.87564e-65
KPNA2	11.6184	0.983288	9.56323	0.525892	2.05513	20.4911	8.83177e-67	4.16888e-65
PARK2	4.97384	1.07691	7.22579	0.584121	-2.25194	-20.4856	9.37021e-67	4.41125e-65
CDCA2	7.35884	1.42363	4.24085	1.16021	3.11799	20.4811	9.83791e-67	4.61911e-65
TSHZ2	6.44276	1.33618	9.23391	0.722743	-2.79114	-20.4798	9.96985e-67	4.66412e-65
TXNIP	13.3478	0.888623	15.309	0.752627	-1.96118	-20.4797	9.98661e-67	4.66412e-65
KCNE1	3.72368	1.53139	7.22039	1.55007	-3.49672	-20.4755	1.04517e-66	4.86844e-65
NPHP3	8.19435	0.612631	9.55968	0.542576	-1.36534	-20.4697	1.11207e-66	5.16642e-65
C18orf34	3.04506	1.39246	6.02999	0.981256	-2.98494	-20.467	1.14412e-66	5.30137e-65
HMGB3	10.3481	1.02197	8.20713	0.572777	2.14099	20.4653	1.16548e-66	5.38624e-65
GNAL	5.48654	1.28989	8.17442	0.683065	-2.68787	-20.4616	1.2133e-66	5.59257e-65
CALCOCO1	10.3001	0.617883	11.5839	0.297015	-1.28379	-20.4607	1.22448e-66	5.62942e-65
ITGA7	7.57823	1.3987	10.8588	1.58834	-3.28059	-20.4324	1.65888e-66	7.60674e-65
AGAP11	4.74173	1.3301	7.5764	0.915126	-2.83467	-20.4064	2.19484e-66	1.00383e-64
ITM2A	8.83062	1.0223	10.9334	0.460933	-2.10282	-20.3965	2.4398e-66	1.11298e-64
CCNE2	7.96144	1.32623	5.17272	0.81199	2.78872	20.392	2.56153e-66	1.16549e-64
AASS	7.38763	0.968803	9.42776	0.598394	-2.04013	-20.3858	2.73757e-66	1.24239e-64
LIMS2	8.26772	0.978053	10.3241	0.597215	-2.05635	-20.3773	2.99872e-66	1.35742e-64
MYLK	10.8568	1.14327	13.3402	0.91162	-2.4834	-20.374	3.10762e-66	1.40312e-64
CTXN1	8.49248	1.25609	5.63857	1.27139	2.85391	20.3676	3.32584e-66	1.49401e-64
KLHL31	5.04933	1.21459	8.11134	1.74209	-3.06201	-20.3677	3.32223e-66	1.49401e-64
H2AFZ	11.9681	0.698497	10.529	0.320835	1.43911	20.3661	3.38114e-66	1.51499e-64
PLEKHM3	7.92576	0.805427	9.63593	0.539546	-1.71017	-20.3598	3.6162e-66	1.61621e-64
LEP	4.67639	2.79774	11.0884	2.95988	-6.41204	-20.3465	4.17233e-66	1.86006e-64
C1QTNF6	9.53356	0.940137	7.53409	0.646541	1.99947	20.3451	4.23532e-66	1.88338e-64
FOXN3	10.253	0.625031	11.7233	0.721015	-1.47033	-20.344	4.28733e-66	1.90172e-64
JAKMIP1	5.08284	1.52818	1.85615	1.00056	3.22669	20.339	4.52518e-66	1.99978e-64
PHF17	9.30189	0.614983	10.6081	0.409728	-1.30619	-20.3388	4.53106e-66	1.99978e-64
ADAM33	5.60882	1.69037	9.06498	0.735088	-3.45616	-20.3372	4.61145e-66	2.03019e-64
ENPP2	9.3404	1.13196	11.8152	0.949983	-2.4748	-20.336	4.67213e-66	2.05178e-64
TMEM132C	4.3069	2.27748	9.19884	1.72193	-4.89194	-20.327	5.14304e-66	2.25298e-64
CFL1	14.1379	0.493852	13.052	0.417544	1.08589	20.3143	5.89313e-66	2.57518e-64
HOXA2	2.85928	1.25314	5.45813	0.689258	-2.59885	-20.3026	6.68491e-66	2.91396e-64
SRPX	8.04601	1.25113	10.695	0.854798	-2.64897	-20.2876	7.85252e-66	3.41449e-64
LETMD1	9.47046	0.473753	10.5251	0.432362	-1.05467	-20.2732	9.16214e-66	3.97416e-64
ARID5B	10.4933	0.779326	12.1327	0.498304	-1.63941	-20.2711	9.37677e-66	4.05729e-64
CD36	9.85479	1.94551	14.1016	1.66652	-4.24678	-20.2497	1.17904e-65	5.08919e-64
CXCL2	4.83018	1.83442	8.66588	1.15556	-3.83569	-20.2296	1.46411e-65	6.30424e-64
MND1	5.96816	1.41109	2.86199	1.27104	3.10617	20.2252	1.53342e-65	6.58661e-64
PKD2	8.98577	0.754869	10.5756	0.497898	-1.58984	-20.2228	1.57389e-65	6.74405e-64
FAM126A	8.45904	0.94865	10.4114	0.49406	-1.95232	-20.2139	1.73143e-65	7.40112e-64
LOC55908	1.01153	1.1959	4.36998	2.23544	-3.35845	-20.2035	1.93595e-65	8.25539e-64
STK32A	1.13318	1.01605	3.46491	1.10803	-2.33172	-20.1934	2.15911e-65	9.18479e-64
DEFB132	2.04883	1.78199	6.51472	2.57742	-4.46589	-20.1929	2.16994e-65	9.20869e-64
E2F2	7.61155	1.25172	4.85188	1.14596	2.75967	20.189	2.26236e-65	9.57788e-64
CXorf36	8.64845	0.907018	10.6076	0.736582	-1.9592	-20.1862	2.33075e-65	9.84379e-64
CD302	9.39031	0.819249	11.1621	0.669117	-1.77179	-20.1831	2.41049e-65	1.01563e-63
NPY2R	1.62542	2.18141	6.73813	2.589	-5.11271	-20.1743	2.64808e-65	1.11308e-63
KL	4.99418	1.33693	7.74115	0.713746	-2.74697	-20.1649	2.92955e-65	1.22846e-63
FAM13C	5.96982	1.18502	8.41337	0.661554	-2.44355	-20.1594	3.10847e-65	1.29733e-63
GPR172A	10.5622	0.845245	8.78966	0.561433	1.77255	20.133	4.12699e-65	1.71835e-63
RBMS2	9.61024	0.553024	10.8077	0.456012	-1.19747	-20.1162	4.94219e-65	2.05293e-63
KLF4	8.9041	1.08257	11.3728	1.1715	-2.46865	-20.1084	5.36994e-65	2.22537e-63
DACT2	2.77576	1.63254	6.18759	1.08642	-3.41183	-20.0963	6.11613e-65	2.52867e-63
PGM5	6.56372	1.48797	9.58882	0.722428	-3.02509	-20.0897	6.5685e-65	2.70935e-63
C13orf36	0.747735	0.987794	3.34657	1.62747	-2.59884	-20.0821	7.12266e-65	2.92896e-63
DDX39	10.2418	0.779695	8.64713	0.402349	1.59466	20.082	7.13408e-65	2.92896e-63
TLN2	9.30937	0.791855	11.1596	0.941457	-1.85028	-20.0631	8.73002e-65	3.57586e-63
CLCN6	8.28871	0.5214	9.38067	0.341881	-1.09196	-20.0538	9.65429e-65	3.9453e-63
TTC28	8.54452	0.903708	10.3577	0.34321	-1.8132	-20.0477	1.02997e-64	4.19932e-63
PACSIN1	6.17959	1.20547	3.65666	0.828077	2.52293	20.0394	1.12633e-64	4.5816e-63
MCM10	7.75604	1.53767	4.54526	1.04063	3.21078	20.0382	1.14127e-64	4.63173e-63
EME1	6.31127	1.1492	3.92091	0.753737	2.39036	20.0205	1.37986e-64	5.58718e-63
MLF1IP	8.9691	1.02596	6.76903	0.842526	2.20007	20.0128	1.49823e-64	6.05259e-63
H2AFX	9.64633	0.932972	7.70589	0.614785	1.94045	19.9944	1.82491e-64	7.35546e-63
CNN1	7.90091	1.61863	11.4246	1.46352	-3.52365	-19.9912	1.88784e-64	7.59178e-63
KCNB1	3.09609	1.76131	6.7877	1.2612	-3.69161	-19.9775	2.18656e-64	8.77309e-63
KIF26B	7.93459	1.26427	5.08573	1.34425	2.84886	19.965	2.49962e-64	1.00064e-62
MTMR10	9.32008	0.546525	10.5007	0.466805	-1.18066	-19.9484	2.98693e-64	1.19301e-62
HOXA7	5.76286	1.37531	8.48739	0.434238	-2.72453	-19.945	3.09835e-64	1.23472e-62
PARP1	12.5005	0.549896	11.3803	0.283703	1.12018	19.9405	3.25261e-64	1.29328e-62
KIAA0408	2.40559	2.28464	7.45443	2.25968	-5.04884	-19.9276	3.73475e-64	1.48165e-62
RXRG	1.56161	1.1224	4.34242	1.6295	-2.78081	-19.9224	3.94852e-64	1.56294e-62
CORO2B	5.84144	1.21848	8.34569	0.748694	-2.50426	-19.9204	4.03444e-64	1.59338e-62
RCC2	12.3547	0.521775	11.1837	0.540531	1.17095	19.9163	4.21548e-64	1.66116e-62
PROS1	8.74222	1.03258	10.8172	0.470298	-2.07498	-19.9155	4.25019e-64	1.67111e-62
BLM	7.68167	1.01612	5.52283	0.81363	2.15883	19.9076	4.62891e-64	1.81597e-62
RACGAP1	9.84473	0.874464	8.07869	0.430215	1.76604	19.9074	4.63924e-64	1.81599e-62
ITPRIPL1	4.77387	1.05592	6.95812	0.692493	-2.18425	-19.9054	4.73788e-64	1.8505e-62
SCN4A	4.73886	1.502	8.02999	1.43753	-3.29113	-19.8914	5.50394e-64	2.14496e-62
CDT1	8.10034	1.22541	5.2793	1.43227	2.82104	19.8902	5.57488e-64	2.16782e-62
CYYR1	8.51307	0.973887	10.4631	0.42394	-1.95005	-19.8889	5.65749e-64	2.19511e-62
KY	2.85206	1.69916	6.70721	1.88697	-3.85515	-19.8885	5.67687e-64	2.1978e-62
IBSP	4.25142	2.0049	0.310073	0.534635	3.94135	19.8836	5.98793e-64	2.31315e-62
RECK	8.02857	0.891985	9.94117	0.767487	-1.9126	-19.8428	9.26575e-64	3.57156e-62
PCDH9	3.92725	1.48189	7.21439	1.51975	-3.28715	-19.8301	1.0616e-63	4.08311e-62
CYP2U1	7.60313	0.72728	9.10601	0.482208	-1.50287	-19.8254	1.11722e-63	4.28769e-62
LAGE3	9.18424	0.909282	7.36669	0.408409	1.81756	19.8155	1.24157e-63	4.7546e-62
MSRB3	9.19499	1.10238	11.3991	0.516183	-2.20415	-19.7882	1.66325e-63	6.35563e-62
CLSPN	6.87065	1.48493	3.76412	1.12411	3.10653	19.7854	1.71389e-63	6.53499e-62
FEN1	9.7601	0.75311	8.22663	0.44251	1.53348	19.7804	1.8094e-63	6.88429e-62
POLR3K	8.91401	0.63329	7.61756	0.391818	1.29645	19.7636	2.16667e-63	8.22588e-62
ACSS2	9.6655	0.604926	11.1596	0.885873	-1.49415	-19.7484	2.54911e-63	9.65706e-62
TENC1	10.1846	0.870497	12.0336	0.730072	-1.84903	-19.7418	2.7348e-63	1.03384e-61
KIF22	10.55	0.633743	9.20125	0.531475	1.34873	19.7416	2.74237e-63	1.03448e-61
RERGL	3.49452	2.03095	7.51873	0.858759	-4.02421	-19.741	2.75907e-63	1.03856e-61
KLHL33	0.873696	0.746379	2.79243	1.21072	-1.91873	-19.7389	2.82354e-63	1.06057e-61
FAM111B	8.68453	1.32123	5.71643	1.4563	2.96809	19.7243	3.29964e-63	1.23677e-61
FAM72A	5.08214	1.3647	2.29319	0.877572	2.78895	19.7204	3.44068e-63	1.2869e-61
RBMS3	4.9591	1.2886	7.58044	0.793118	-2.62134	-19.7164	3.59209e-63	1.34069e-61
ATP6V0B	11.4039	0.627286	10.1081	0.433606	1.29583	19.7002	4.27042e-63	1.5905e-61
E2F7	6.43626	1.36305	3.54561	1.15613	2.89065	19.6981	4.37021e-63	1.62425e-61
ACSM5	4.30054	1.40783	7.58189	1.77853	-3.28135	-19.6779	5.42753e-63	2.01297e-61
ANO6	10.8496	0.642307	12.3476	0.806441	-1.49802	-19.6765	5.50925e-63	2.039e-61
FAM72B	7.01666	1.27764	4.44311	0.723829	2.57355	19.6721	5.7757e-63	2.13314e-61
CRY2	9.7143	0.657326	11.0903	0.509059	-1.376	-19.6694	5.94397e-63	2.19071e-61
TLCD1	7.55103	1.05475	5.36762	0.77021	2.18341	19.6602	6.55533e-63	2.411e-61
DNAJB4	8.27254	0.710662	9.80508	0.658554	-1.53254	-19.6578	6.72855e-63	2.46956e-61
MYH1	0.886302	1.0229	4.19012	2.55965	-3.30382	-19.6434	7.85176e-63	2.87583e-61
TMTC1	8.40247	1.44067	11.2528	0.647214	-2.85029	-19.6398	8.16151e-63	2.98309e-61
EGFLAM	7.52436	0.92712	9.42643	0.638539	-1.90208	-19.6212	9.95793e-63	3.62911e-61
FAM196B	3.10401	1.67259	6.99952	2.12859	-3.89551	-19.6211	9.97007e-63	3.62911e-61
FZD4	9.85403	0.988873	12.2	1.32742	-2.34598	-19.6185	1.02474e-62	3.72237e-61
ADH1C	3.7511	2.13738	8.01408	1.12115	-4.26299	-19.6125	1.09288e-62	3.96176e-61
AIM1L	4.52354	1.6398	1.2569	0.848798	3.26664	19.6024	1.21813e-62	4.40675e-61
SVEP1	8.50477	1.58107	11.825	1.3095	-3.32027	-19.5891	1.40373e-62	5.06778e-61
RAD51AP1	7.87362	1.11714	5.57516	0.801581	2.29845	19.5889	1.40768e-62	5.07166e-61
FRMD1	1.6808	1.33765	5.06313	2.13336	-3.38233	-19.5844	1.47633e-62	5.30817e-61
TIMP4	4.89447	2.14067	9.57426	2.18218	-4.67979	-19.578	1.58187e-62	5.6761e-61
CRHBP	2.93903	1.17892	5.90188	1.85561	-2.96285	-19.57	1.72325e-62	6.17085e-61
C3orf64	8.6929	0.678702	10.0447	0.343771	-1.35176	-19.5626	1.86452e-62	6.66319e-61
GHR	7.74166	1.59127	11.069	1.29959	-3.32738	-19.5505	2.12383e-62	7.57458e-61
MMP27	1.19127	0.968767	3.61007	1.50377	-2.4188	-19.5467	2.21064e-62	7.86826e-61
PRR19	5.90642	0.817858	3.99876	1.05383	1.90766	19.5416	2.33377e-62	8.28983e-61
ENTHD1	2.89404	1.09883	0.664757	0.715703	2.22928	19.5397	2.3822e-62	8.44487e-61
SYNPO2	9.6533	1.2831	12.2453	0.810035	-2.59199	-19.5287	2.68173e-62	9.48764e-61
CENPK	6.46448	0.990895	4.26183	1.08735	2.20265	19.527	2.73092e-62	9.64234e-61
TIMM17A	10.6203	0.542941	9.52783	0.315007	1.09243	19.5102	3.26724e-62	1.1513e-60
HNRNPAB	11.8439	0.541216	10.7337	0.377646	1.11019	19.5098	3.28342e-62	1.15469e-60
TMEM100	4.75562	1.68443	8.27457	1.38839	-3.51895	-19.5045	3.47295e-62	1.21892e-60
EEPD1	7.55899	0.793483	9.25349	0.731216	-1.69451	-19.5005	3.62522e-62	1.26983e-60
PHYHIP	4.27832	1.34842	6.98899	0.828778	-2.71068	-19.4884	4.12781e-62	1.44302e-60
CCDC3	8.26521	1.00225	10.6559	1.39326	-2.39072	-19.4859	4.23985e-62	1.47925e-60
SCN3B	4.07541	1.37467	6.79938	0.7157	-2.72397	-19.4847	4.2947e-62	1.49544e-60
TMEM47	8.64452	1.07851	10.7748	0.536872	-2.13025	-19.471	4.97056e-62	1.72737e-60
EDNRB	7.5549	1.19017	9.91696	0.647091	-2.36206	-19.4447	6.58959e-62	2.28551e-60
NFKBIL2	8.59159	1.05962	6.33207	0.990637	2.25952	19.4377	7.09913e-62	2.45741e-60
SAMD14	4.24075	1.0307	2.05494	0.937992	2.18581	19.4328	7.48198e-62	2.58487e-60
CDC14C	2.01606	0.829776	3.77474	0.751625	-1.75869	-19.4229	8.31346e-62	2.86093e-60
KLF9	9.81886	0.850903	11.6172	0.767122	-1.79838	-19.388	1.20831e-61	4.15009e-60
NLGN1	2.50633	1.59085	5.68415	0.970524	-3.17781	-19.3848	1.24979e-61	4.28422e-60
CCDC85A	5.00546	1.36198	7.7965	1.03101	-2.79103	-19.3779	1.34633e-61	4.60624e-60
HELLS	7.41975	0.941196	5.26289	1.18034	2.15686	19.3752	1.38521e-61	4.72094e-60
TMEM22	5.69271	0.819835	7.57746	1.03875	-1.88475	-19.3648	1.54798e-61	5.26552e-60
PTRF	12.1852	0.89759	14.0389	0.716276	-1.85378	-19.3533	1.75063e-61	5.9434e-60
FGF1	7.65426	1.24513	10.1297	0.733957	-2.4754	-19.3466	1.88039e-61	6.37167e-60
ARHGAP11A	8.70922	1.08537	6.54092	0.670843	2.1683	19.346	1.89431e-61	6.40654e-60
DIXDC1	9.0329	0.91809	10.8363	0.460907	-1.80336	-19.3404	2.01056e-61	6.78669e-60
CES1	6.88607	1.90939	10.9248	1.77914	-4.03875	-19.3131	2.69103e-61	9.06629e-60
C5orf4	8.21918	1.42427	10.9592	0.514796	-2.74005	-19.2864	3.58234e-61	1.20462e-59
C9orf5	10.4866	0.569285	11.6586	0.448457	-1.17192	-19.2684	4.34047e-61	1.45678e-59
PDE11A	4.11009	1.65452	7.45717	1.19488	-3.34707	-19.2592	4.79253e-61	1.60545e-59
GNAI1	7.86994	1.07886	10.1702	1.05802	-2.30026	-19.242	5.75805e-61	1.9216e-59
TEF	8.82044	0.790879	10.4507	0.645545	-1.63028	-19.2357	6.16125e-61	2.04841e-59
PROC	3.45784	1.2317	1.03565	0.687846	2.42219	19.2271	6.74873e-61	2.23951e-59
CBX7	9.15456	0.930943	10.966	0.444275	-1.81142	-19.2229	7.06393e-61	2.33533e-59
TYMS	9.3696	1.07072	7.14905	0.916173	2.22054	19.223	7.05317e-61	2.33533e-59
PLD5	1.17179	1.26976	3.81004	1.10333	-2.63825	-19.2144	7.7298e-61	2.55069e-59
SAMD5	6.02458	1.46054	9.23612	1.64033	-3.21154	-19.214	7.76712e-61	2.55822e-59
PID1	6.29695	1.27795	8.93106	1.06245	-2.63411	-19.2082	8.26468e-61	2.71703e-59
CCT3	13.1145	0.568136	11.9809	0.359114	1.13359	19.2002	9.00105e-61	2.95362e-59
PELI2	6.84801	1.14677	9.05648	0.468309	-2.20847	-19.1996	9.05625e-61	2.96622e-59
CKMT2	3.46416	1.50857	6.64304	1.42215	-3.17888	-19.1896	1.00834e-60	3.29653e-59
GSTM5	5.05915	1.85008	8.87777	1.56621	-3.81863	-19.1858	1.04925e-60	3.42393e-59
C17orf103	8.21404	0.817119	9.91962	0.730556	-1.70558	-19.1743	1.18679e-60	3.86561e-59
SLC16A3	9.40557	1.14137	6.99298	1.0938	2.41258	19.1736	1.19569e-60	3.88742e-59
PDK4	9.25055	1.81485	12.9512	1.43172	-3.70065	-19.1723	1.21201e-60	3.93323e-59
SMYD1	2.68939	2.12274	7.60097	2.8439	-4.91159	-19.1672	1.28081e-60	4.1489e-59
ICOS	6.09979	1.35369	3.35061	1.03853	2.74918	19.1669	1.28418e-60	4.1522e-59
CENPL	7.83128	0.718849	6.44249	0.311967	1.38879	19.1608	1.37089e-60	4.42444e-59
C1orf135	6.36334	1.12528	4.1779	0.556897	2.18544	19.1553	1.4546e-60	4.68606e-59
C10orf90	2.47895	1.91327	6.26499	1.20642	-3.78605	-19.1438	1.6449e-60	5.28946e-59
NMT2	8.16777	0.819415	9.90205	0.792694	-1.73427	-19.1381	1.74781e-60	5.61014e-59
JAM2	7.22394	1.03319	9.22606	0.501683	-2.00212	-19.131	1.88546e-60	6.041e-59
LTA	5.00649	1.29573	2.39832	0.945483	2.60817	19.1292	1.92247e-60	6.14841e-59
C14orf180	2.6895	2.20615	7.52752	2.50138	-4.83802	-19.1207	2.10461e-60	6.71877e-59
FANCA	8.07074	1.15867	5.6107	1.14859	2.46004	19.1192	2.13811e-60	6.81341e-59
ORC6L	7.09312	1.33084	4.42816	0.938645	2.66496	19.1153	2.22831e-60	7.08803e-59
TPO	3.07155	1.45236	5.94814	0.952731	-2.8766	-19.0731	3.49841e-60	1.10881e-58
HBA2	6.20557	1.61228	10.0245	2.3365	-3.81895	-19.0695	3.63567e-60	1.15025e-58
KLF11	9.19904	0.579733	10.3898	0.48413	-1.19073	-19.0508	4.44164e-60	1.40273e-58
COMP	10.022	2.11993	5.51613	2.15411	4.50583	19.0486	4.54549e-60	1.43296e-58
GPLD1	3.46246	1.34414	6.381	1.48695	-2.91854	-19.0469	4.62709e-60	1.45609e-58
PEAR1	6.94312	1.11131	9.11644	0.647922	-2.17332	-19.0444	4.75417e-60	1.49342e-58
LSM4	10.8368	0.68833	9.48539	0.40946	1.35146	19.0396	5.00127e-60	1.56825e-58
SHE	7.35638	1.01605	9.4074	0.77958	-2.05102	-19.0371	5.13692e-60	1.60793e-58
IL12B	3.31189	1.26762	0.817821	0.794454	2.49407	19.0342	5.30015e-60	1.65609e-58
VAMP2	10.3002	0.586312	11.4276	0.256598	-1.12741	-19.0273	5.70376e-60	1.77905e-58
ZC3H12B	4.57379	0.810098	6.18141	0.545581	-1.60762	-19.0175	6.33626e-60	1.97284e-58
CASC5	7.39133	1.43935	4.48665	1.12116	2.90468	19.0052	7.22526e-60	2.24568e-58
COX7A1	6.21416	1.22176	8.78631	1.20341	-2.57215	-18.9872	8.75291e-60	2.71571e-58
PCNA	11.3113	0.685728	9.97491	0.389029	1.33637	18.9776	9.69852e-60	3.00382e-58
STAB2	2.34134	1.70079	5.87487	1.58442	-3.53353	-18.9683	1.07086e-59	3.31084e-58
DPYSL2	10.7793	0.716219	12.1749	0.411081	-1.39557	-18.9618	1.14828e-59	3.54401e-58
CDH13	7.89151	0.866044	9.64932	0.706956	-1.75781	-18.9486	1.32219e-59	4.07365e-58
ORC1L	6.94564	1.25009	4.36234	1.14071	2.5833	18.9355	1.51962e-59	4.67377e-58
NMUR1	3.38913	1.22149	6.20192	1.66927	-2.81278	-18.9335	1.55332e-59	4.7691e-58
CA3	4.2491	1.95937	8.39375	2.01297	-4.14464	-18.9079	2.03955e-59	6.25109e-58
MRAS	9.42596	1.00421	11.4786	0.868918	-2.05262	-18.9052	2.10116e-59	6.42875e-58
CCR7	7.85779	1.31091	5.21725	1.04356	2.64054	18.9037	2.13407e-59	6.51815e-58
CDC6	8.76223	1.41847	5.95443	1.00297	2.8078	18.8919	2.42008e-59	7.37893e-58
MTHFD2	10.9488	0.732631	9.50177	0.502073	1.44707	18.8783	2.79875e-59	8.51881e-58
STIL	8.4297	1.07069	6.31163	0.75408	2.11807	18.8771	2.83369e-59	8.61033e-58
FREM1	5.6795	1.53736	8.71768	1.08523	-3.03818	-18.8676	3.1374e-59	9.51679e-58
FAM72D	5.95477	1.32801	3.36213	0.844047	2.59264	18.8612	3.35751e-59	1.01622e-57
FERMT2	9.76877	0.8503	11.6089	0.959528	-1.84018	-18.861	3.36549e-59	1.01622e-57
KCTD4	0.515262	0.743512	2.23744	1.0398	-1.72218	-18.8609	3.36743e-59	1.01622e-57
FAM180B	1.85842	1.31506	4.98369	1.97742	-3.12527	-18.8566	3.52672e-59	1.06247e-57
LRRC15	10.6299	1.631	7.2618	1.522	3.36808	18.8464	3.93348e-59	1.18299e-57
UTRN	10.8894	0.872538	12.5974	0.566577	-1.70803	-18.8435	4.05635e-59	1.21787e-57
C2orf40	4.59366	2.41916	9.13928	0.891712	-4.54561	-18.8351	4.43753e-59	1.3278e-57
USP44	2.58709	1.25012	5.01214	0.757849	-2.42505	-18.8281	4.78036e-59	1.42796e-57
RSPO3	6.11124	1.1891	8.49615	0.945268	-2.38492	-18.8227	5.06317e-59	1.50989e-57
MPL	3.69389	0.754473	5.17373	0.500798	-1.47984	-18.8201	5.20655e-59	1.55003e-57
LIPE	7.81974	1.78159	11.7364	2.15601	-3.91669	-18.8124	5.65203e-59	1.67982e-57
NRN1	7.69723	1.1199	9.97358	0.967368	-2.27635	-18.8116	5.6975e-59	1.69048e-57
GPD1	7.02871	2.61417	12.4177	2.44913	-5.38904	-18.8057	6.07106e-59	1.7983e-57
CAPZA3	0.745598	0.915491	2.91196	1.36958	-2.16636	-18.7996	6.47431e-59	1.91453e-57
MCM2	10.2962	0.867071	8.52713	0.76556	1.76908	18.7912	7.0807e-59	2.09035e-57
ESM1	6.91218	1.14241	4.5204	1.15263	2.39178	18.778	8.15203e-59	2.4026e-57
BMX	3.9375	1.60811	7.0549	1.0009	-3.1174	-18.7751	8.40872e-59	2.47413e-57
SNCA	5.34653	0.944452	7.22498	0.722844	-1.87846	-18.7591	9.97562e-59	2.93028e-57
EPB42	0.88801	1.20267	4.12031	2.38387	-3.2323	-18.7568	1.02202e-58	2.99215e-57
FN1	16.0266	1.26172	13.4134	1.21957	2.61319	18.757	1.02042e-58	2.99215e-57
C4orf12	3.68444	1.04191	5.69042	0.605851	-2.00598	-18.7495	1.10532e-58	3.23068e-57
C14orf139	6.71226	1.07544	9.12019	1.39174	-2.40793	-18.748	1.12215e-58	3.27444e-57
C7orf58	7.34113	1.27994	10.0909	1.44409	-2.74977	-18.7456	1.15146e-58	3.34958e-57
SYNGR3	5.38791	1.36122	2.7466	0.865938	2.64131	18.7456	1.15169e-58	3.34958e-57
POLE2	6.55604	0.861439	4.7651	0.845553	1.79094	18.7446	1.16352e-58	3.37841e-57
LGI4	5.49268	1.13933	7.7842	0.949673	-2.29152	-18.7299	1.3609e-58	3.94506e-57
ABCA8	6.23479	2.31632	10.6654	1.28854	-4.43058	-18.7238	1.45306e-58	4.20529e-57
PDE1C	3.71286	1.78661	7.27342	1.4206	-3.56056	-18.7151	1.59442e-58	4.60685e-57
ABCA5	8.00042	1.02118	9.93566	0.493928	-1.93524	-18.7133	1.62572e-58	4.68961e-57
TMEM178	4.28797	1.33709	6.99654	1.16969	-2.70856	-18.7123	1.64274e-58	4.731e-57
SGK2	3.39883	1.62096	6.86518	1.81348	-3.46635	-18.7078	1.72366e-58	4.95593e-57
SIRPG	6.2405	1.32519	3.55344	1.1689	2.68706	18.7018	1.83625e-58	5.27109e-57
C20orf194	8.69335	0.690792	10.0282	0.419978	-1.33482	-18.7	1.87137e-58	5.36319e-57
ABLIM1	11.1724	0.794887	12.7013	0.464613	-1.5289	-18.6999	1.87447e-58	5.36334e-57
GPC3	7.39519	1.88035	10.9876	1.04577	-3.59237	-18.6984	1.90544e-58	5.44315e-57
ANKRD53	3.34079	1.18707	5.83629	1.24271	-2.4955	-18.6944	1.98806e-58	5.66998e-57
AQP1	11.4606	1.16481	13.6602	0.544799	-2.19965	-18.6937	2.00142e-58	5.69887e-57
FAM70A	5.59037	1.21521	7.95384	0.809232	-2.36347	-18.6906	2.07021e-58	5.88528e-57
GPR109A	5.66327	1.28247	8.45218	1.52751	-2.78891	-18.6886	2.11374e-58	5.99935e-57
ZBED2	5.00569	1.59877	1.89781	1.06942	3.10788	18.6812	2.2883e-58	6.48439e-57
P2RY12	4.21407	1.28931	6.7975	1.06937	-2.58343	-18.6802	2.31149e-58	6.53958e-57
MMP1	7.36906	2.96684	1.76034	1.46297	5.60872	18.6739	2.47265e-58	6.98433e-57
TMC2	1.32346	0.910646	3.49152	1.40684	-2.16806	-18.6719	2.52429e-58	7.11883e-57
RCBTB2	8.07023	0.615944	9.2382	0.299174	-1.16798	-18.6606	2.84759e-58	8.01777e-57
AHNAK	14.62	0.981292	16.5282	0.658279	-1.90818	-18.6595	2.88263e-58	8.1035e-57
ALDH1A1	8.87122	1.15433	11.2012	1.00551	-2.32995	-18.6536	3.07028e-58	8.61728e-57
SLC16A12	2.5826	1.63494	5.77558	1.15749	-3.19299	-18.6402	3.54092e-58	9.92244e-57
ASB1	8.3827	0.545668	9.42873	0.306842	-1.04604	-18.6392	3.57653e-58	1.00063e-56
FAM149A	5.37226	1.18044	7.72932	0.971992	-2.35706	-18.6341	3.77775e-58	1.05526e-56
MRAP	2.1967	2.24406	7.16937	2.87634	-4.97267	-18.6294	3.97065e-58	1.10739e-56
GPR116	9.38008	0.887846	11.2316	0.909713	-1.85148	-18.623	4.25069e-58	1.18362e-56
LRRC70	5.29109	0.996418	7.28044	0.820534	-1.98936	-18.6223	4.28125e-58	1.19025e-56
GYS2	0.818531	0.81195	3.62425	2.42704	-2.80571	-18.6043	5.18997e-58	1.44062e-56
TRIM11	9.5645	0.650763	8.24447	0.583021	1.32004	18.6002	5.42062e-58	1.50229e-56
DMGDH	4.09313	1.2411	6.79948	1.5167	-2.70635	-18.5964	5.64288e-58	1.56143e-56
ZAK	10.2601	0.754052	11.8289	0.767241	-1.5688	-18.5956	5.69033e-58	1.5721e-56
TAL1	5.61976	0.980271	7.56528	0.789445	-1.94552	-18.5775	6.90037e-58	1.8975e-56
MEIS2	6.75906	1.03827	8.71372	0.513001	-1.95466	-18.5654	7.85176e-58	2.15575e-56
OXTR	6.99876	1.72849	11.2163	2.87475	-4.21751	-18.5615	8.18584e-58	2.24399e-56
PDZD2	8.49266	1.26509	11.0712	1.19315	-2.57853	-18.554	8.85767e-58	2.42439e-56
PER1	9.15339	1.11857	11.3727	0.908592	-2.21927	-18.5536	8.90067e-58	2.43239e-56
CDK5	8.40269	0.659855	7.12678	0.434213	1.27591	18.5534	8.91478e-58	2.43248e-56
PTPN7	8.23273	1.1081	6.0147	0.951937	2.21804	18.5423	1.00345e-57	2.73378e-56
ECT2	10.0982	0.907884	8.36258	0.548639	1.73559	18.541	1.01776e-57	2.76851e-56
GYG2	7.83327	1.39967	11.1385	2.16129	-3.30521	-18.539	1.03916e-57	2.82235e-56
FAM162B	3.45964	1.11639	5.62348	0.772949	-2.16384	-18.5371	1.06074e-57	2.87654e-56
TMEM8A	10.3758	0.638443	9.11843	0.490491	1.25738	18.5227	1.23616e-57	3.34711e-56
THSD1	6.68962	0.837672	8.26563	0.419876	-1.57601	-18.5184	1.29405e-57	3.49848e-56
CLDN19	2.63991	1.91631	6.71917	2.19404	-4.07926	-18.509	1.43082e-57	3.86233e-56
PLIN4	8.69225	2.5751	13.8936	2.36104	-5.20134	-18.5056	1.48376e-57	3.99913e-56
FAM107A	6.88748	1.68718	10.0812	0.953225	-3.19371	-18.4999	1.57562e-57	4.24023e-56
ZFP106	10.6001	0.65863	12.045	0.828871	-1.44493	-18.4983	1.60311e-57	4.30765e-56
DPT	9.14801	1.41031	12.1892	1.69326	-3.04123	-18.4915	1.72389e-57	4.62516e-56
SLAMF8	9.1971	1.09397	6.96097	1.06155	2.23613	18.4901	1.7486e-57	4.68435e-56
RHOF	7.7101	1.20185	5.28576	1.0946	2.42434	18.4888	1.77297e-57	4.74243e-56
HAS3	6.29172	1.55209	9.47808	1.54493	-3.18636	-18.4796	1.95522e-57	5.22202e-56
SQLE	10.8056	1.09324	8.61036	0.974117	2.1952	18.4772	2.00578e-57	5.34894e-56
AKAP12	9.0539	1.32001	11.7399	1.26095	-2.68604	-18.4761	2.03044e-57	5.40654e-56
SH2D2A	6.72131	1.19575	4.37798	0.924779	2.34333	18.4686	2.19893e-57	5.84637e-56
RGN	3.99497	1.74222	7.19707	0.595632	-3.2021	-18.4668	2.24019e-57	5.94711e-56
ZNF781	4.2813	0.862337	5.93004	0.542737	-1.64874	-18.4644	2.29802e-57	6.09149e-56
TACC1	10.6532	0.888999	12.467	0.858398	-1.81373	-18.4622	2.35465e-57	6.23222e-56
PTPN21	8.21343	0.948907	9.98024	0.429001	-1.76681	-18.4547	2.54849e-57	6.73519e-56
PLA2R1	7.62817	1.03788	9.64065	0.746585	-2.01248	-18.4513	2.64317e-57	6.97496e-56
GPX3	10.2846	1.33191	13.2725	1.8205	-2.98785	-18.446	2.79691e-57	7.36965e-56
C11orf87	0.594153	0.771311	2.45346	1.26361	-1.85931	-18.4323	3.23573e-57	8.51321e-56
GMIP	9.11863	0.625689	7.8061	0.680073	1.31253	18.4304	3.30086e-57	8.67164e-56
MYOCD	2.68758	1.39779	5.45628	1.17951	-2.7687	-18.4152	3.87838e-57	1.01737e-55
ASAM	7.65887	1.14284	10.008	1.15934	-2.34909	-18.413	3.96993e-57	1.03984e-55
SAV1	9.6974	0.597226	10.8268	0.336303	-1.12942	-18.4043	4.35786e-57	1.13976e-55
TMEM63B	10.4021	0.576844	9.31392	0.314107	1.08822	18.4026	4.43714e-57	1.15878e-55
WDR34	10.6973	0.76084	9.14687	0.739709	1.55039	18.3995	4.58359e-57	1.19525e-55
RELN	4.76147	1.99064	8.52976	1.19999	-3.76829	-18.3962	4.7466e-57	1.23594e-55
RNF186	1.37338	1.38825	4.41292	1.78133	-3.03955	-18.3926	4.93281e-57	1.28253e-55
ZBTB16	4.16285	2.34718	8.56712	1.2912	-4.40427	-18.3848	5.35877e-57	1.39123e-55
PFKFB1	3.17246	1.61726	6.73386	2.11619	-3.56139	-18.3839	5.41284e-57	1.40321e-55
CDKN1C	7.63599	1.11474	9.77603	0.766251	-2.14005	-18.3764	5.85764e-57	1.51629e-55
CST1	6.73511	3.1958	0.828569	1.415	5.90654	18.3751	5.94157e-57	1.53576e-55
SPRY1	9.28651	1.02541	11.2143	0.573545	-1.92779	-18.3689	6.34867e-57	1.63859e-55
B4GALT3	10.5855	0.594008	9.45723	0.359241	1.12829	18.3668	6.4864e-57	1.67169e-55
FHL5	4.37771	1.4767	7.24396	1.11531	-2.86626	-18.3627	6.77828e-57	1.74437e-55
FBXL6	9.02977	0.89381	7.33704	0.545641	1.69273	18.3486	7.8743e-57	2.02348e-55
ISG15	10.5604	1.66353	7.37894	1.13145	3.18144	18.344	8.26691e-57	2.12128e-55
TDRD10	3.33243	1.19837	5.57713	0.657355	-2.2447	-18.3394	8.68587e-57	2.22555e-55
LTBP4	9.51792	1.01837	11.5054	0.804002	-1.98748	-18.3271	9.89705e-57	2.53221e-55
ECM2	8.37934	1.19141	10.903	1.38715	-2.52367	-18.3203	1.06317e-56	2.71624e-55
ZHX3	9.23007	0.622924	10.4301	0.44068	-1.20004	-18.3181	1.08837e-56	2.77661e-55
MCAM	10.8981	0.812347	12.7537	1.18558	-1.85559	-18.3148	1.12768e-56	2.87273e-55
SYN2	4.46907	1.87115	7.94247	0.942464	-3.4734	-18.3042	1.26137e-56	3.20869e-55
CILP2	7.49713	1.46859	4.7229	0.911139	2.77423	18.299	1.33406e-56	3.3887e-55
INHBA	7.85968	1.47182	5.04464	1.02117	2.81504	18.2984	1.34195e-56	3.40385e-55
AKAP6	5.75641	1.07939	7.89737	0.952889	-2.14096	-18.2826	1.5866e-56	4.01863e-55
RCC1	9.92292	0.813044	8.06464	1.19505	1.85828	18.2759	1.70513e-56	4.31265e-55
ECE2	7.88247	1.01773	5.94609	0.677666	1.93638	18.2753	1.7145e-56	4.33015e-55
DAAM2	8.21957	0.96303	10.1528	0.905017	-1.93318	-18.2736	1.74655e-56	4.40479e-55
CHST11	7.72212	0.822935	6.13535	0.607168	1.58677	18.2688	1.83776e-56	4.62821e-55
SLC19A3	5.69873	2.12308	10.1703	2.4552	-4.47153	-18.2635	1.94445e-56	4.88994e-55
REEP4	9.06639	0.743853	7.66702	0.440688	1.39937	18.26	2.01815e-56	5.06807e-55
ISM1	7.28675	1.39552	9.89457	0.789646	-2.60783	-18.2554	2.11975e-56	5.31564e-55
PLIN1	7.65033	2.72298	13.091	2.53749	-5.4407	-18.2474	2.30712e-56	5.77728e-55
RHOJ	7.22525	0.927533	8.92939	0.406252	-1.70413	-18.2397	2.50241e-56	6.25745e-55
LOC399959	7.46671	1.08168	9.4515	0.470372	-1.9848	-18.2339	2.66319e-56	6.65007e-55
C1orf190	3.87507	1.01083	5.75051	0.525626	-1.87544	-18.2301	2.77266e-56	6.91362e-55
ANGPTL5	0.988121	0.941161	3.71217	2.22941	-2.72405	-18.2215	3.03676e-56	7.5615e-55
EPAS1	11.5443	0.855424	13.2862	0.868965	-1.7419	-18.2185	3.13642e-56	7.79863e-55
IL11RA	7.25864	0.891474	8.89535	0.392604	-1.63671	-18.2181	3.14791e-56	7.8162e-55
MYCT1	7.47677	0.959223	9.35018	0.79552	-1.87341	-18.1932	4.09891e-56	1.01632e-54
DCTPP1	10.0988	0.581957	8.96333	0.471241	1.13546	18.1888	4.29441e-56	1.0633e-54
MPDZ	9.24784	0.821377	10.7955	0.51947	-1.5477	-18.1836	4.54188e-56	1.123e-54
ABCA6	6.56232	1.48025	9.36721	1.0052	-2.80489	-18.1757	4.93968e-56	1.21965e-54
AKR1C1	6.83928	1.9891	10.7593	1.76103	-3.91998	-18.1735	5.05259e-56	1.24579e-54
CXCR3	7.14342	1.32378	4.55584	1.12425	2.58758	18.151	6.41794e-56	1.58023e-54
CIDEC	5.56577	2.77719	11.0848	2.60879	-5.51906	-18.1196	8.956e-56	2.20208e-54
ALS2CR4	9.14284	0.564495	10.264	0.516743	-1.12118	-18.115	9.39849e-56	2.30766e-54
PSRC1	7.65864	0.967834	5.74732	0.876311	1.91133	18.1104	9.87102e-56	2.42032e-54
CHRNA6	3.24444	1.41226	0.631455	0.784164	2.61298	18.1037	1.05948e-55	2.59417e-54
RDM1	3.58566	1.33682	1.07327	0.873875	2.51239	18.1023	1.07582e-55	2.63055e-54
NECAB1	5.02147	1.34509	7.51041	0.747662	-2.48894	-18.1021	1.07791e-55	2.63201e-54
LOC145820	2.83182	1.16116	5.09293	0.986944	-2.26111	-18.0745	1.44413e-55	3.52137e-54
GGTA1	7.51216	0.932489	9.30788	0.739745	-1.79573	-18.0649	1.59887e-55	3.89329e-54
ROBO4	8.6003	0.844405	10.3073	0.86315	-1.70703	-18.0597	1.68964e-55	4.10867e-54
SLC12A8	8.75008	0.710401	7.01256	1.25599	1.73752	18.0577	1.72539e-55	4.18982e-54
HDGF	13.1085	0.645148	11.9227	0.325351	1.18587	18.0519	1.8344e-55	4.44842e-54
PKHD1L1	3.00519	1.47584	6.15776	1.86023	-3.15257	-18.0485	1.90306e-55	4.6086e-54
PPP1CA	11.7771	0.574305	10.6926	0.388327	1.0845	18.04	2.08216e-55	5.03539e-54
KCNAB1	5.84733	1.07806	7.9059	0.818895	-2.05857	-18.0377	2.13243e-55	5.14289e-54
C5orf53	7.77144	0.651267	9.02373	0.510687	-1.25229	-18.0327	2.24831e-55	5.41495e-54
RNF150	5.42921	1.60279	8.44656	1.10304	-3.01735	-18.0309	2.29231e-55	5.51342e-54
CREB5	6.66902	1.16982	8.88047	0.830613	-2.21145	-18.0252	2.43383e-55	5.84583e-54
P4HA3	7.02975	1.27428	4.422	1.38832	2.60775	18.0212	2.54112e-55	6.09524e-54
NBLA00301	3.40929	1.09949	5.47167	0.732865	-2.06238	-18.0194	2.58936e-55	6.20251e-54
RBP4	6.03372	2.40112	10.858	2.44	-4.82423	-18.0074	2.9396e-55	7.03193e-54
HIST1H2AM	3.56851	1.44748	0.903655	0.807761	2.66486	18.0072	2.94703e-55	7.04018e-54
OLR1	8.46817	1.19667	5.80247	1.71456	2.6657	18.0038	3.0548e-55	7.28776e-54
YAP1	11.0245	0.710116	12.3302	0.377909	-1.30574	-18.0026	3.09382e-55	7.37089e-54
RGS6	3.49945	1.65643	6.51687	0.808534	-3.01742	-17.9975	3.26618e-55	7.77105e-54
SGCG	2.39728	1.65573	6.03252	2.28562	-3.63523	-17.9949	3.35515e-55	7.97197e-54
SCN9A	3.93932	1.07329	6.17355	1.25109	-2.23423	-17.994	3.38816e-55	8.0396e-54
NDN	7.9435	0.981971	9.81804	0.75608	-1.87455	-17.9916	3.47589e-55	8.23668e-54
PSME2	11.4311	0.762772	10.0314	0.403912	1.39965	17.9808	3.89828e-55	9.22522e-54
PGM5P2	1.32633	0.749478	2.82824	0.750071	-1.50191	-17.9782	4.00486e-55	9.46476e-54
FAM83H	11.4118	0.788839	9.40649	1.52343	2.00533	17.9702	4.36126e-55	1.02795e-53
MAML2	8.13765	1.15001	10.2677	0.702212	-2.13005	-17.961	4.80887e-55	1.13044e-53
GBP5	9.41137	1.60588	6.4434	0.973588	2.96796	17.9464	5.60824e-55	1.31659e-53
TK2	9.3989	0.51332	10.4894	0.639037	-1.0905	-17.9364	6.23897e-55	1.46272e-53
PRKD1	6.5127	1.00536	8.33506	0.470039	-1.82236	-17.9353	6.30851e-55	1.47706e-53
EGR1	11.6016	1.50336	14.4978	1.26045	-2.89629	-17.9329	6.47043e-55	1.51297e-53
OVCH2	0.941536	1.08819	3.57902	1.92027	-2.63748	-17.9322	6.52062e-55	1.52269e-53
WHAMML2	4.39782	0.983634	6.25711	0.725473	-1.85929	-17.9238	7.13007e-55	1.6628e-53
LMNB2	10.59	0.767638	9.10483	0.654495	1.48519	17.92	7.41808e-55	1.72769e-53
PLK4	7.81941	0.939589	6.06461	0.630036	1.7548	17.9191	7.48804e-55	1.74168e-53
CLCA4	1.79698	1.73118	5.43814	2.12834	-3.64116	-17.9122	8.05394e-55	1.87084e-53
MARCKSL1	12.8159	0.69304	11.1784	1.15696	1.63749	17.909	8.3359e-55	1.9338e-53
CRTAP	11.6578	0.498561	12.7325	0.652621	-1.07472	-17.9061	8.59118e-55	1.9904e-53
ANGPT1	6.01608	1.38341	8.76216	1.36411	-2.74608	-17.9025	8.93345e-55	2.06699e-53
CDNF	4.42839	0.850069	6.01704	0.577593	-1.58864	-17.8952	9.642e-55	2.22801e-53
SLC7A10	2.96987	1.91739	7.17939	2.69116	-4.20952	-17.8889	1.03138e-54	2.38012e-53
KIT	8.9136	1.5817	12.0895	1.6466	-3.17592	-17.8881	1.03973e-54	2.39627e-53
C16orf88	9.27196	0.52939	8.22995	0.492204	1.04201	17.8852	1.07281e-54	2.46929e-53
SBK1	9.31331	1.06687	6.91138	1.598	2.40193	17.8846	1.07916e-54	2.48067e-53
EHBP1	9.60926	0.538726	10.7752	0.718243	-1.16592	-17.8814	1.11681e-54	2.56388e-53
GINS2	8.33528	1.06616	6.20271	1.09367	2.13257	17.8688	1.27603e-54	2.92559e-53
EMCN	8.22464	1.05829	10.1766	0.652149	-1.95194	-17.8651	1.32713e-54	3.03881e-53
FLJ37543	0.916877	0.765696	2.62247	1.11709	-1.7056	-17.8582	1.42676e-54	3.25427e-53
CCL16	0.954309	0.904704	2.75783	0.915386	-1.80352	-17.8557	1.46552e-54	3.33835e-53
WASF3	7.43338	1.24348	9.72785	0.777152	-2.29446	-17.8551	1.47429e-54	3.354e-53
SEMA7A	7.7957	0.896928	6.08152	0.730822	1.71418	17.85	1.55592e-54	3.53516e-53
BOLA2	10.1136	0.662911	8.89122	0.403226	1.22243	17.8392	1.74522e-54	3.96016e-53
WHAMML1	5.42022	0.913151	7.14202	0.683272	-1.7218	-17.8388	1.75117e-54	3.96858e-53
EHD2	10.6263	0.947023	12.5224	0.982326	-1.89601	-17.8319	1.88486e-54	4.26607e-53
DIAPH3	7.37082	1.3052	4.91731	0.965827	2.45351	17.8307	1.90914e-54	4.31549e-53
NCAM1	5.44333	1.49211	8.17863	0.888943	-2.73531	-17.8283	1.95718e-54	4.41843e-53
AVPR2	3.73294	1.47002	6.45653	0.971208	-2.7236	-17.8279	1.96677e-54	4.4344e-53
TM4SF18	6.85136	1.12758	8.90376	0.615562	-2.05241	-17.825	2.02796e-54	4.56654e-53
PRCD	2.79772	0.911628	4.51962	0.695858	-1.7219	-17.8192	2.15542e-54	4.84736e-53
2019-09-10	10.0159	0.652408	11.2028	0.342145	-1.18688	-17.8187	2.16712e-54	4.86747e-53
PCYOX1	11.1765	0.626605	12.4419	0.670574	-1.26546	-17.813	2.30231e-54	5.16455e-53
LPHN3	4.31967	1.70461	7.41187	0.914968	-3.0922	-17.8027	2.56635e-54	5.74953e-53
CXCL12	11.1459	1.05446	13.0983	0.699511	-1.95239	-17.7942	2.80668e-54	6.27999e-53
CLEC5A	6.3105	1.40817	3.66107	1.06541	2.64943	17.7938	2.81958e-54	6.30088e-53
MFAP2	9.66332	1.17564	7.46354	0.8536	2.19979	17.7897	2.94302e-54	6.56841e-53
KLHL13	6.71447	1.60997	9.75811	1.26291	-3.04363	-17.788	2.99927e-54	6.68549e-53
MMP9	10.5637	1.65844	7.08715	2.06343	3.47655	17.7862	3.05445e-54	6.79265e-53
SEMA3D	5.61998	1.67303	8.64135	0.855641	-3.02136	-17.7862	3.05504e-54	6.79265e-53
F10	4.73225	1.36939	7.37414	1.21496	-2.64188	-17.7757	3.41348e-54	7.58008e-53
CD5	7.9508	1.19718	5.6705	0.996475	2.2803	17.744	4.7749e-54	1.059e-52
PKD1L2	3.29928	1.52881	6.38795	1.68658	-3.08867	-17.7385	5.06067e-54	1.12097e-52
ACADL	2.92589	2.13508	6.97201	1.73662	-4.04612	-17.7353	5.23502e-54	1.15668e-52
PDIA4	12.2939	0.569665	11.1944	0.501837	1.09951	17.733	5.36409e-54	1.18372e-52
IL33	7.79502	1.61149	10.6524	0.624026	-2.85738	-17.7316	5.4426e-54	1.19955e-52
CLIC5	7.06695	0.960984	8.94682	0.923014	-1.87987	-17.727	5.7116e-54	1.25726e-52
TNFRSF18	6.63385	1.37555	4.02119	1.13711	2.61266	17.7192	6.20532e-54	1.36424e-52
BAK1	9.04657	0.61557	7.89774	0.441233	1.14883	17.7142	6.53642e-54	1.43525e-52
PLAC9	5.59895	1.70151	8.83329	1.42311	-3.23435	-17.7041	7.27938e-54	1.5964e-52
TMEM132A	10.6828	1.15965	8.33927	1.29072	2.34358	17.6943	8.06716e-54	1.76697e-52
KIAA1211	7.17989	1.3514	4.5055	1.385	2.67439	17.6917	8.29378e-54	1.81435e-52
KIF24	7.60021	0.781257	6.07588	0.746255	1.52433	17.686	8.80908e-54	1.9247e-52
CLEC4GP1	0.957023	1.04279	3.17538	1.37972	-2.21836	-17.6811	9.27843e-54	2.02474e-52
CCR4	5.893	1.33836	3.32035	1.19886	2.57265	17.6787	9.51254e-54	2.07326e-52
ST6GALNAC3	5.34683	0.964176	7.21983	0.90745	-1.87301	-17.6784	9.54623e-54	2.07804e-52
MMRN2	9.41783	0.943552	11.2001	0.761734	-1.78232	-17.6721	1.01984e-53	2.21726e-52
DCN	13.1921	1.17287	15.4137	0.968944	-2.2216	-17.6666	1.08112e-53	2.34472e-52
MEOX2	6.15246	1.56921	8.99477	0.906308	-2.8423	-17.6666	1.08062e-53	2.34472e-52
AP1S1	9.96212	0.620077	8.78771	0.502332	1.1744	17.6653	1.09624e-53	2.3746e-52
SPARCL1	12.2289	1.09081	14.1552	0.415031	-1.92637	-17.6575	1.19033e-53	2.57525e-52
KIF4B	3.04694	0.982921	1.24378	0.64192	1.80316	17.6567	1.20016e-53	2.59334e-52
FOSB	8.85566	2.09816	12.8366	1.77415	-3.98093	-17.6418	1.40444e-53	3.03105e-52
PDCD1	5.78002	1.4722	3.05424	1.05516	2.72578	17.6412	1.41406e-53	3.04809e-52
ARL4A	8.49489	0.79626	10.0667	0.81363	-1.57184	-17.6317	1.56305e-53	3.36514e-52
PLEKHH2	6.84959	1.27612	9.14197	0.683812	-2.29237	-17.6228	1.71602e-53	3.68997e-52
SCN5A	2.71275	1.29591	5.20235	1.17647	-2.4896	-17.6222	1.72728e-53	3.70967e-52
ADAMTS1	9.84615	1.2024	12.0819	0.905072	-2.23579	-17.5925	2.36215e-53	5.05472e-52
ACO1	9.72385	0.649044	11.3342	1.24475	-1.61038	-17.5894	2.44136e-53	5.21789e-52
PAK3	2.87859	1.52876	5.78008	1.31653	-2.9015	-17.5852	2.55155e-53	5.44681e-52
C9orf140	8.82341	1.13614	6.35715	1.61728	2.46626	17.585	2.5579e-53	5.45376e-52
ADHFE1	5.87148	1.24106	8.16911	0.912997	-2.29763	-17.573	2.90455e-53	6.18539e-52
SLC25A22	9.32382	0.794238	7.80191	0.716094	1.5219	17.5718	2.93976e-53	6.25284e-52
CCL14	7.52492	1.88932	10.9029	1.00114	-3.378	-17.5662	3.12036e-53	6.62897e-52
TTYH3	11.1567	0.758734	9.68732	0.722451	1.4694	17.5636	3.20624e-53	6.80324e-52
LIMK1	10.2528	0.596341	9.08719	0.59015	1.16559	17.5509	3.66579e-53	7.76901e-52
TCF21	0.843104	0.773917	2.51028	1.08139	-1.66717	-17.5498	3.70741e-53	7.84779e-52
PIK3R2	11.0262	0.581632	9.90967	0.527266	1.1165	17.5459	3.86155e-53	8.16429e-52
NNAT	4.13776	1.6773	7.46624	1.80187	-3.32848	-17.5443	3.92773e-53	8.29427e-52
FABP4	8.63853	2.80826	13.8188	2.05384	-5.18022	-17.5391	4.15011e-53	8.75341e-52
FLAD1	10.2885	0.653766	9.1333	0.278881	1.15523	17.527	4.71764e-53	9.93857e-52
CLDND2	1.33055	0.945871	3.33795	1.27472	-2.0074	-17.5242	4.85539e-53	1.02166e-51
INMT	6.14213	1.4013	8.70531	0.969999	-2.56318	-17.5031	6.06402e-53	1.27294e-51
FUT7	4.61129	1.43148	1.99878	0.974645	2.61251	17.4993	6.31276e-53	1.32201e-51
PPP1R1A	6.53842	2.22233	10.6693	1.74485	-4.13092	-17.4931	6.74135e-53	1.41009e-51
SLC16A7	4.56522	1.35578	7.38858	1.74607	-2.82336	-17.4722	8.40259e-53	1.75549e-51
GPR17	2.1435	1.31527	4.58829	1.03999	-2.44478	-17.4625	9.30447e-53	1.94162e-51
PCOLCE2	5.72082	2.22391	10.072	2.30095	-4.35122	-17.4615	9.40179e-53	1.95961e-51
MLXIPL	4.54277	1.89472	8.21232	1.88304	-3.66955	-17.4432	1.14026e-52	2.37385e-51
DNA2	7.41	0.970062	5.62755	0.711721	1.78246	17.435	1.24328e-52	2.58525e-51
CCDC36	3.33659	0.973047	5.31446	1.16623	-1.97786	-17.4253	1.37711e-52	2.86017e-51
N4BP2L1	7.92782	0.787403	9.34163	0.469887	-1.41381	-17.4225	1.41801e-52	2.94166e-51
CLDN11	6.93372	1.53617	9.66274	0.831105	-2.72902	-17.4213	1.43659e-52	2.97671e-51
PLXNA4	7.07689	1.43624	10.0185	1.77174	-2.94164	-17.4209	1.44162e-52	2.98363e-51
CASQ2	4.31738	1.66197	7.45569	1.46796	-3.13832	-17.418	1.48759e-52	3.07517e-51
SOBP	6.19952	1.03954	8.03972	0.531586	-1.8402	-17.416	1.51812e-52	3.13461e-51
LRRN3	4.75227	1.38364	7.37545	1.25209	-2.62318	-17.4032	1.73753e-52	3.58344e-51
ARRDC3	10.7129	0.738401	12.1551	0.761272	-1.44223	-17.4023	1.75376e-52	3.61271e-51
MGLL	10.3348	1.05248	12.4306	1.17919	-2.09583	-17.4005	1.78779e-52	3.6785e-51
APOA1BP	11.0784	0.616587	9.97763	0.342359	1.1008	17.4003	1.79083e-52	3.68048e-51
PCNX	10.1892	0.601226	11.3015	0.46066	-1.11236	-17.3982	1.83207e-52	3.76085e-51
FBLN5	9.88839	0.990409	11.7121	0.75279	-1.82373	-17.3878	2.04332e-52	4.18964e-51
COL6A6	5.18763	1.83808	8.5307	1.29448	-3.34308	-17.3734	2.37704e-52	4.86501e-51
TRDN	1.41556	1.56023	5.00807	2.64193	-3.5925	-17.3734	2.37822e-52	4.86501e-51
SP140	7.18094	1.18451	5.01505	0.864982	2.16589	17.3716	2.42292e-52	4.95072e-51
HOXA3	5.20393	1.31274	7.48093	0.485285	-2.27701	-17.3713	2.42992e-52	4.95928e-51
PGA3	0.903208	1.0988	3.51575	1.99286	-2.61254	-17.3609	2.71259e-52	5.5298e-51
MANF	10.3651	0.592875	9.27481	0.442327	1.09028	17.3558	2.86152e-52	5.82667e-51
LEF1	8.68533	1.01989	6.59367	1.27757	2.09167	17.35	3.04099e-52	6.18498e-51
KCTD12	10.9971	0.818223	12.4962	0.60977	-1.49915	-17.335	3.56279e-52	7.22959e-51
PLAUR	9.46266	0.967786	7.63273	0.881863	1.82993	17.3187	4.22835e-52	8.57029e-51
MCOLN2	6.49231	1.03632	4.48181	1.06617	2.0105	17.3177	4.27427e-52	8.65343e-51
FLJ10357	9.59825	0.730172	10.9225	0.505602	-1.32422	-17.3118	4.5485e-52	9.19808e-51
FGD4	8.21248	0.773947	9.6005	0.486595	-1.38802	-17.3116	4.55428e-52	9.19922e-51
KIAA1524	7.74505	1.05499	5.86587	0.630606	1.87918	17.3035	4.95919e-52	1.00057e-50
PCDHGB7	6.52709	1.33902	8.82807	0.423711	-2.30098	-17.2988	5.20988e-52	1.04995e-50
CES4	1.64779	1.49624	4.67602	1.81713	-3.02823	-17.2974	5.29203e-52	1.06529e-50
BOC	8.8186	1.08353	10.704	0.468231	-1.88543	-17.2972	5.30291e-52	1.06626e-50
HIST2H2AA3	9.49217	1.42316	6.95181	0.88026	2.54037	17.2956	5.38959e-52	1.08246e-50
RAPGEF3	7.80188	1.17058	9.88096	0.689434	-2.07908	-17.2827	6.17094e-52	1.23798e-50
AKR1C3	7.99698	1.35359	10.5506	1.24066	-2.55359	-17.2741	6.75826e-52	1.35426e-50
FTO	10.075	0.666392	11.2838	0.469441	-1.20878	-17.2669	7.2888e-52	1.45892e-50
TUSC5	5.52043	2.95826	11.0426	2.57958	-5.52217	-17.2661	7.35232e-52	1.46997e-50
LLGL2	10.4844	0.836696	8.63031	1.31343	1.85408	17.2605	7.79924e-52	1.55755e-50
MRGPRF	6.48969	1.16393	8.59031	0.812293	-2.10063	-17.2456	9.11554e-52	1.81837e-50
SALL4	4.56569	1.23271	2.34215	0.85891	2.22354	17.2421	9.45861e-52	1.88468e-50
HTR2A	1.98199	1.3536	4.63319	1.47778	-2.6512	-17.2405	9.62099e-52	1.91487e-50
RASSF9	4.65138	1.25191	6.84455	0.644987	-2.19317	-17.2357	1.01174e-51	2.0114e-50
CDH20	1.34906	1.11095	3.87154	1.85547	-2.52248	-17.231	1.06318e-51	2.1113e-50
PARVA	10.6717	0.573041	11.7662	0.554118	-1.09446	-17.2295	1.07985e-51	2.14198e-50
HS3ST4	1.96617	1.90305	5.71391	2.13109	-3.74774	-17.2266	1.11346e-51	2.20617e-50
S100B	6.52804	1.97086	10.0222	1.19014	-3.49414	-17.226	1.12019e-51	2.21702e-50
SCN11A	3.0579	1.11886	5.11867	0.908355	-2.06077	-17.2255	1.12619e-51	2.22641e-50
CNTNAP3	4.93519	1.80281	8.03536	0.674189	-3.10018	-17.2234	1.1518e-51	2.27448e-50
RHOXF1	1.01918	0.914561	2.99627	1.35851	-1.97709	-17.2223	1.16423e-51	2.29646e-50
EIF3L	12.4683	0.551809	13.4683	0.39043	-1.00003	-17.2107	1.31582e-51	2.58681e-50
GZMK	7.95463	1.36627	5.39766	1.22681	2.55697	17.2048	1.40045e-51	2.75012e-50
AOC2	3.78319	1.02804	5.9231	1.38348	-2.13991	-17.2002	1.46844e-51	2.88042e-50
SEMA6A	8.0173	1.17613	10.0332	0.409239	-2.01591	-17.1984	1.49783e-51	2.93482e-50
GPR109B	4.33987	1.10297	6.41436	1.01597	-2.07449	-17.1974	1.51309e-51	2.96142e-50
LOC644538	5.90097	0.837677	7.42761	0.636895	-1.52663	-17.1963	1.53019e-51	2.99159e-50
LIMD2	9.10743	1.16527	7.02964	0.756644	2.07779	17.182	1.7784e-51	3.473e-50
EDA	5.50317	1.00548	7.25608	0.500764	-1.75292	-17.1811	1.79558e-51	3.50267e-50
IRF7	9.56484	1.10288	7.58738	0.752972	1.97746	17.1764	1.88647e-51	3.6759e-50
GFAP	2.93005	1.925	6.40064	1.39587	-3.4706	-17.1576	2.29706e-51	4.46612e-50
PYCRL	9.13093	0.919805	7.45496	0.711535	1.67597	17.1568	2.31827e-51	4.50018e-50
VIP	1.17133	0.88152	2.91256	1.00773	-1.74123	-17.1567	2.31968e-51	4.50018e-50
PASK	8.40573	0.660714	7.1107	0.730774	1.29504	17.1504	2.47795e-51	4.80195e-50
PCK1	3.80489	2.52177	8.80955	2.95407	-5.00466	-17.1484	2.53133e-51	4.90001e-50
HADH	10.4281	0.538203	11.5888	0.798939	-1.16069	-17.138	2.82123e-51	5.45521e-50
TIFAB	4.3592	1.37069	1.86276	1.07577	2.49645	17.1314	3.02513e-51	5.83669e-50
GRIA4	3.08586	2.15033	7.21158	2.22296	-4.12572	-17.1261	3.19676e-51	6.16109e-50
CSRNP3	2.32857	1.38291	5.0406	1.55647	-2.71203	-17.1251	3.23047e-51	6.21734e-50
ERG	8.20055	0.930344	9.85861	0.615483	-1.65805	-17.1251	3.23299e-51	6.21734e-50
CCDC69	9.13065	0.964337	11.1517	1.3416	-2.02101	-17.1135	3.64827e-51	7.00832e-50
SMC4	10.9622	0.830149	9.5185	0.418489	1.44371	17.1102	3.78021e-51	7.2539e-50
GRIK1	1.29532	1.38751	4.28975	2.09428	-2.99443	-17.0992	4.24047e-51	8.11945e-50
SOX7	6.98034	0.980706	8.78645	0.833741	-1.80611	-17.0849	4.92861e-51	9.41663e-50
P2RX6	1.76141	1.1405	4.10344	1.50553	-2.34203	-17.0842	4.96485e-51	9.47562e-50
LAMP3	8.5422	1.4125	5.91748	1.26913	2.62472	17.0815	5.10375e-51	9.7302e-50
PFN1	13.4949	0.568284	12.4756	0.394148	1.01928	17.081	5.13048e-51	9.77061e-50
ANGPTL2	10.1622	1.01048	12.0686	0.976214	-1.9064	-17.0784	5.27475e-51	1.00345e-49
AGMAT	5.49651	0.929583	3.72577	0.937782	1.77074	17.0752	5.4556e-51	1.03674e-49
LRIG3	8.43296	0.988897	10.1209	0.368357	-1.68795	-17.0748	5.4762e-51	1.03954e-49
STBD1	8.61553	0.78885	10.3413	1.23184	-1.72578	-17.074	5.52223e-51	1.04715e-49
TYMP	10.9097	1.18701	8.71293	1.04844	2.19678	17.0611	6.32075e-51	1.19728e-49
SLIT3	9.07399	1.30538	11.4494	1.0463	-2.37536	-17.0589	6.47177e-51	1.22457e-49
USHBP1	5.06061	1.18942	7.15988	0.757758	-2.09927	-17.0429	7.65143e-51	1.44624e-49
CALR	14.2596	0.585105	13.2214	0.377615	1.03818	17.0423	7.69797e-51	1.45348e-49
FLJ13197	3.76147	1.18669	5.84626	0.726533	-2.08479	-17.0329	8.4963e-51	1.6025e-49
ODF3L1	2.21696	1.16213	4.42609	1.17915	-2.20913	-17.0284	8.9075e-51	1.67826e-49
SLC25A27	5.46831	1.42388	7.91595	0.669028	-2.44765	-17.0197	9.75654e-51	1.83627e-49
TSPAN7	7.92528	1.41768	10.3812	0.754616	-2.45594	-17.0074	1.11017e-50	2.08721e-49
GSG2	5.93425	1.10052	3.96149	0.811064	1.97276	17.0057	1.13015e-50	2.12251e-49
NCRNA00086	4.91679	1.37161	7.36529	0.98369	-2.4485	-17.0052	1.13565e-50	2.13059e-49
CXCL13	9.05858	2.17563	4.54584	3.00538	4.51274	16.9998	1.20264e-50	2.25387e-49
RGS19	8.66115	0.689126	7.38734	0.609658	1.27381	16.9965	1.24512e-50	2.33101e-49
HES6	7.04187	1.45169	4.50327	0.870271	2.5386	16.9961	1.24984e-50	2.33735e-49
PCDHGA3	3.513	1.28733	5.77808	0.821031	-2.26508	-16.9916	1.31053e-50	2.44826e-49
TNFSF4	7.15185	0.995297	5.31719	0.877533	1.83466	16.9905	1.3251e-50	2.47287e-49
EPB41L2	10.3562	0.827504	11.8833	0.732258	-1.52717	-16.9867	1.37849e-50	2.56979e-49
ANTXR2	9.52618	0.752708	11.037	0.939933	-1.51082	-16.978	1.51023e-50	2.8124e-49
CLIP4	8.15253	1.13279	10.1068	0.579373	-1.95429	-16.9778	1.51431e-50	2.81703e-49
KIAA1199	7.4236	1.74616	4.31428	1.24846	3.10932	16.9755	1.55054e-50	2.8814e-49
ELMOD3	8.45667	0.567698	9.74686	0.976629	-1.29018	-16.9743	1.56983e-50	2.91417e-49
CRYAB	9.22838	2.0331	12.7565	1.15249	-3.52812	-16.9584	1.85415e-50	3.43836e-49
DCUN1D3	7.45098	0.509073	8.54337	0.765696	-1.09239	-16.9568	1.88644e-50	3.49457e-49
C19orf40	6.12202	0.617632	4.99944	0.501691	1.12257	16.9447	2.14084e-50	3.96168e-49
CENPI	5.96949	1.40352	3.52856	0.818791	2.44093	16.9446	2.14317e-50	3.96184e-49
C9orf100	7.20016	0.9996	5.4736	0.532635	1.72656	16.94	2.2488e-50	4.15275e-49
SNRPB	11.6207	0.685928	10.4042	0.470829	1.21646	16.9391	2.26906e-50	4.18579e-49
TFPI	8.41745	1.11478	10.3921	0.773897	-1.97463	-16.9351	2.36827e-50	4.36423e-49
CSK	10.6277	0.57876	9.54316	0.555399	1.08456	16.9337	2.40171e-50	4.42125e-49
G0S2	7.31808	1.70054	10.7282	2.15236	-3.41011	-16.9236	2.66957e-50	4.90923e-49
FANCD2	8.86079	0.824816	7.24203	0.967323	1.61876	16.9206	2.75465e-50	5.06041e-49
CDC25A	7.22554	1.29381	4.92083	0.94897	2.30471	16.9168	2.86676e-50	5.2609e-49
TRHDE	2.07272	1.6358	5.50989	2.37241	-3.43717	-16.9117	3.02476e-50	5.54508e-49
TUBB3	9.40328	1.65936	6.49106	1.08857	2.91222	16.9038	3.28432e-50	6.01467e-49
LSR	11.3427	0.834281	9.68803	1.01862	1.6547	16.9004	3.40342e-50	6.22631e-49
MMRN1	6.32398	1.90805	9.77878	1.57764	-3.4548	-16.8982	3.48422e-50	6.36754e-49
NOTCH4	8.66657	0.849209	10.2105	0.711859	-1.54391	-16.897	3.52755e-50	6.44005e-49
KCNJ10	4.77219	1.55898	2.07415	0.896582	2.69805	16.8861	3.95187e-50	7.20727e-49
ZWILCH	8.88206	0.600937	7.80234	0.462736	1.07972	16.8836	4.05758e-50	7.39243e-49
DAB2IP	9.99732	0.686659	11.2164	0.491658	-1.21913	-16.8697	4.69306e-50	8.54138e-49
TOR2A	8.36469	0.637658	7.23681	0.442497	1.12788	16.8624	5.0639e-50	9.20681e-49
STRA6	7.47361	1.04076	5.0298	1.95164	2.44381	16.862	5.08807e-50	9.24123e-49
NME1	10.8657	0.966138	9.21089	0.488923	1.65479	16.8588	5.25935e-50	9.5425e-49
FGF10	2.33895	1.93255	5.64947	1.0026	-3.31051	-16.8569	5.36415e-50	9.72266e-49
ITSN1	9.58923	0.640114	11.0544	1.13687	-1.46515	-16.8544	5.50515e-50	9.96799e-49
PLAC1	3.62387	1.76793	0.640541	0.709281	2.98333	16.8512	5.69135e-50	1.02946e-48
STRBP	10.259	0.56353	9.19121	0.580968	1.06779	16.8485	5.85573e-50	1.05702e-48
SLC47A2	1.20698	0.990403	3.00144	0.835533	-1.79446	-16.8313	7.01415e-50	1.26484e-48
CPEB1	3.19917	1.39339	5.58111	0.717346	-2.38194	-16.8234	7.61838e-50	1.371e-48
CIDEA	3.90165	2.67356	8.87383	2.60877	-4.97218	-16.8214	7.7724e-50	1.39729e-48
WSCD2	3.36892	1.69492	6.26335	0.865332	-2.89443	-16.8212	7.79128e-50	1.39926e-48
ETV7	7.10192	1.35526	4.70896	0.975897	2.39296	16.8108	8.6854e-50	1.55825e-48
C8orf30A	9.77164	0.808236	8.39583	0.389318	1.37581	16.7951	1.02347e-49	1.83435e-48
DNMT1	11.081	0.586867	9.9888	0.567347	1.09216	16.7929	1.04764e-49	1.87577e-48
NFKBIE	8.94409	0.803444	7.47121	0.730802	1.47289	16.7836	1.15371e-49	2.06359e-48
ROBLD3	10.0225	0.699314	8.78369	0.512705	1.23878	16.7814	1.18155e-49	2.11125e-48
ADH1B	8.18959	3.23198	13.8124	2.10153	-5.62284	-16.7812	1.184e-49	2.11348e-48
C19orf28	10.1569	0.655585	8.94852	0.611036	1.20839	16.7735	1.28254e-49	2.28706e-48
TBX15	6.72563	1.06741	8.78168	1.21265	-2.05605	-16.7691	1.34224e-49	2.39112e-48
LOC401093	5.9578	1.02026	7.78448	0.820676	-1.82668	-16.7645	1.40838e-49	2.50641e-48
CKAP2	9.6273	0.770146	8.27858	0.523232	1.34872	16.7605	1.46865e-49	2.61104e-48
DUSP6	10.1145	1.02057	11.8517	0.516046	-1.7372	-16.7589	1.49419e-49	2.65376e-48
LOC285419	1.34251	0.941893	3.02389	0.744846	-1.68138	-16.7545	1.56429e-49	2.77548e-48
ELANE	0.745881	0.9073	2.58052	1.2107	-1.83464	-16.7515	1.61411e-49	2.86099e-48
CDCA4	8.73976	0.684495	7.51303	0.5507	1.22673	16.7472	1.68753e-49	2.98814e-48
LARP6	7.35929	0.996	9.10796	0.704351	-1.74867	-16.741	1.80102e-49	3.1859e-48
C10orf108	1.92229	1.2324	4.10903	0.947651	-2.18675	-16.7374	1.87065e-49	3.30576e-48
FBXO43	4.18658	1.09654	2.24564	0.828669	1.94094	16.7335	1.94833e-49	3.43615e-48
ACOT7	9.22237	0.823954	7.79188	0.527732	1.43049	16.732	1.97725e-49	3.48367e-48
CYP3A4	0.541911	0.778965	2.20442	1.20403	-1.66251	-16.7261	2.10449e-49	3.70046e-48
C3orf55	3.66054	1.59797	6.58558	1.48213	-2.92503	-16.7256	2.11449e-49	3.71435e-48
C1QTNF7	4.28186	1.68267	7.36636	1.57647	-3.0845	-16.7168	2.31917e-49	4.06983e-48
EZR	12.8613	0.635	11.5856	0.832262	1.27567	16.715	2.36338e-49	4.14331e-48
PIK3R1	11.232	0.995302	12.9371	0.566082	-1.70508	-16.7129	2.41385e-49	4.22759e-48
BMPER	3.75992	1.67952	6.71808	1.24829	-2.95816	-16.7034	2.66604e-49	4.66465e-48
WSCD1	4.92378	1.26014	7.09349	0.768523	-2.16971	-16.7023	2.69821e-49	4.71626e-48
C12orf48	7.2145	0.901652	5.6491	0.591159	1.5654	16.6971	2.84764e-49	4.97252e-48
EMX2OS	4.6768	1.39328	7.2319	1.31411	-2.55511	-16.6967	2.85825e-49	4.98612e-48
SNTB2	9.45795	0.551764	10.4847	0.546215	-1.0268	-16.6966	2.86149e-49	4.98685e-48
NFAT5	10.2619	0.661836	11.4325	0.498065	-1.17056	-16.6883	3.12027e-49	5.43247e-48
SLC2A6	7.15573	1.10214	5.21653	0.815553	1.93919	16.6826	3.31364e-49	5.76344e-48
AKR1C2	6.33842	2.33805	10.5434	2.01216	-4.20493	-16.6724	3.68393e-49	6.39489e-48
ASXL3	2.50608	1.44892	4.94901	0.701994	-2.44293	-16.6622	4.09691e-49	7.1048e-48
INTS7	9.68755	0.643009	8.59225	0.344288	1.0953	16.6561	4.36859e-49	7.5685e-48
LRWD1	8.4521	0.680801	7.2196	0.601376	1.23249	16.6496	4.6741e-49	8.08987e-48
TRPC1	6.23722	0.914098	7.79295	0.50115	-1.55573	-16.6485	4.7252e-49	8.17029e-48
RNF180	6.3032	1.14482	8.20669	0.426823	-1.90348	-16.6404	5.14291e-49	8.88385e-48
NPR2	7.202	1.00668	8.95354	0.695412	-1.75153	-16.6394	5.19527e-49	8.96553e-48
UGP2	11.2453	0.496025	12.32	0.800166	-1.07467	-16.6322	5.60459e-49	9.66245e-48
RGL1	9.07319	0.778061	10.4408	0.578597	-1.36764	-16.631	5.67106e-49	9.76749e-48
C11orf48	9.45151	0.606556	8.42496	0.302352	1.02654	16.6241	6.09463e-49	1.04868e-47
IFI6	12.2107	1.59914	9.43012	1.11848	2.78059	16.621	6.29531e-49	1.08216e-47
EMP1	11.5273	0.974771	13.3262	0.96431	-1.79886	-16.6177	6.51612e-49	1.11902e-47
ALG3	10.0403	0.651912	8.93537	0.33745	1.10489	16.6159	6.64066e-49	1.1393e-47
C14orf49	5.35887	1.12929	7.56631	1.39648	-2.20744	-16.6068	7.29624e-49	1.24935e-47
KAT2B	8.38492	0.736855	9.72437	0.676277	-1.33945	-16.6056	7.3899e-49	1.26416e-47
FCGR1A	7.17315	1.12549	4.93513	1.46967	2.23802	16.6027	7.62107e-49	1.30244e-47
PPP1R14B	10.4687	0.896366	8.9326	0.54807	1.53609	16.6008	7.77213e-49	1.32697e-47
C1orf31	8.63676	0.672111	7.50133	0.338175	1.13542	16.5991	7.91097e-49	1.34937e-47
RHPN1	9.14319	1.18616	6.8629	1.38955	2.28029	16.5978	8.02142e-49	1.36689e-47
STMN1	11.9706	1.03086	10.2379	0.499407	1.73275	16.5968	8.10543e-49	1.37988e-47
HIST1H3H	4.31989	1.72879	1.39316	0.942663	2.92673	16.5942	8.32642e-49	1.41613e-47
ATAD2	10.6447	1.05031	8.82484	0.71915	1.81989	16.5907	8.63175e-49	1.46665e-47
C13orf15	8.50613	0.810154	9.9619	0.706637	-1.45577	-16.5812	9.53149e-49	1.61797e-47
TBC1D4	9.86809	0.743133	11.1369	0.438336	-1.26884	-16.5793	9.72157e-49	1.64865e-47
BMP3	1.75994	1.68001	4.95727	1.91097	-3.19733	-16.5756	1.0101e-48	1.71135e-47
EFEMP1	10.5311	1.37798	12.8655	0.766048	-2.33442	-16.5736	1.03112e-48	1.7453e-47
GRIA1	1.9176	1.83182	5.16833	1.51583	-3.25073	-16.5588	1.20293e-48	2.03415e-47
PTH1R	4.29205	1.4455	6.89375	1.29458	-2.6017	-16.5559	1.23999e-48	2.09282e-47
CLDN5	7.15613	1.55587	9.82405	0.997835	-2.66792	-16.5551	1.25131e-48	2.1099e-47
POU6F1	7.18023	0.779959	8.47515	0.305376	-1.29492	-16.5548	1.25478e-48	2.11372e-47
ARHGAP39	8.82551	0.85386	7.1477	1.08324	1.67781	16.5476	1.35228e-48	2.27579e-47
FBXL19	9.15936	0.692608	7.8463	0.774681	1.31305	16.5445	1.39656e-48	2.34808e-47
PPEF1	4.90352	1.32923	2.18159	1.90883	2.72193	16.5389	1.48082e-48	2.48738e-47
CD300LF	6.12805	0.935121	4.38095	0.995104	1.7471	16.537	1.50941e-48	2.53032e-47
KLHL10	1.22475	0.710769	2.52265	0.680166	-1.2979	-16.537	1.51068e-48	2.53032e-47
DONSON	8.36061	0.82794	6.98296	0.352255	1.37765	16.5343	1.55323e-48	2.59912e-47
EPHB1	5.60859	1.4505	8.26286	1.42118	-2.65427	-16.5278	1.66245e-48	2.77661e-47
ADRBK2	9.27161	0.717074	10.7438	1.03459	-1.4722	-16.524	1.7283e-48	2.88387e-47
CABP1	2.34179	1.04947	4.30201	1.12294	-1.96021	-16.516	1.87983e-48	3.1308e-47
ARHGEF10	8.90092	0.758123	10.1718	0.374368	-1.27086	-16.5065	2.07458e-48	3.44864e-47
ZNF695	5.62734	1.65261	2.81372	1.02012	2.81362	16.5036	2.13803e-48	3.55077e-47
GALE	9.34252	0.87783	7.79037	0.719521	1.55215	16.497	2.28953e-48	3.79881e-47
HIST1H3D	4.87529	1.81467	1.71717	1.36066	3.15812	16.4856	2.57707e-48	4.26788e-47
DTX1	6.5574	1.07599	8.58727	1.20565	-2.02986	-16.4851	2.59078e-48	4.28656e-47
NEXN	7.66982	0.941649	9.33479	0.777936	-1.66498	-16.4802	2.72579e-48	4.50572e-47
SAMD1	8.43657	0.599099	7.37593	0.490573	1.06064	16.4792	2.75495e-48	4.54966e-47
MAGI1	9.02143	0.859708	10.4661	0.457434	-1.44466	-16.4716	2.98244e-48	4.92075e-47
TRAF2	9.14576	0.706544	7.82068	0.772483	1.32508	16.4661	3.15592e-48	5.20211e-47
USP53	9.39306	0.896082	10.9098	0.52443	-1.51677	-16.4648	3.20172e-48	5.27269e-47
RFC2	9.62883	0.617291	8.59732	0.294826	1.03151	16.462	3.29362e-48	5.41897e-47
LCA5	7.01832	0.977344	8.66131	0.535664	-1.643	-16.4495	3.75051e-48	6.16093e-47
LOC283867	3.08082	1.52527	0.570834	0.595232	2.50999	16.4495	3.75156e-48	6.16093e-47
MBNL2	10.2397	0.829501	11.6241	0.409044	-1.38439	-16.4442	3.96308e-48	6.50225e-47
C2orf84	1.68906	0.958729	3.70019	1.4844	-2.01113	-16.4392	4.17626e-48	6.84565e-47
PER2	9.29038	0.749462	10.6911	0.814831	-1.40071	-16.4381	4.22261e-48	6.91521e-47
C17orf91	6.87629	0.711371	8.29207	0.954861	-1.41578	-16.4378	4.23955e-48	6.93651e-47
LGALS12	4.23121	2.38692	8.64263	2.50663	-4.41141	-16.4359	4.32057e-48	7.06253e-47
BCHE	3.58014	1.53998	6.33796	1.39696	-2.75782	-16.434	4.40763e-48	7.19818e-47
S1PR1	9.04609	0.990167	10.7961	0.831854	-1.75002	-16.43	4.59567e-48	7.49141e-47
HBA1	2.93982	2.6051	7.93926	3.1556	-4.99943	-16.4213	5.02882e-48	8.18992e-47
SYNE1	9.8988	0.867478	11.3836	0.580376	-1.48482	-16.4211	5.03862e-48	8.19832e-47
D4S234E	4.91067	1.54656	7.66908	1.38261	-2.75842	-16.4133	5.46446e-48	8.88301e-47
CAB39L	9.02367	1.0039	10.6992	0.515977	-1.67554	-16.4126	5.50389e-48	8.93888e-47
RNASE4	9.63707	1.10352	11.5202	0.728647	-1.88314	-16.411	5.60077e-48	9.07953e-47
SCT	2.71302	1.46211	0.312446	0.578049	2.40058	16.4017	6.16636e-48	9.98724e-47
SMS	11.1867	0.629676	10.1298	0.341037	1.05691	16.3949	6.61673e-48	1.06971e-46
DBF4	8.33999	0.755213	7.05344	0.48902	1.28655	16.3907	6.91521e-48	1.11694e-46
PIF1	5.50042	1.3954	3.16732	0.758138	2.3331	16.3882	7.09278e-48	1.14457e-46
IL9R	3.34048	1.21393	1.27847	0.781041	2.06201	16.3861	7.25221e-48	1.16923e-46
OSBPL1A	10.1273	0.742561	11.3668	0.383985	-1.23958	-16.3834	7.45571e-48	1.20094e-46
NVL	9.78187	0.66344	8.68304	0.29978	1.09883	16.3804	7.68859e-48	1.23732e-46
PCDHGB6	5.14244	1.29806	7.28366	0.577564	-2.14122	-16.3801	7.71661e-48	1.2407e-46
SOX12	9.81484	0.910607	8.24657	0.657551	1.56828	16.3721	8.38198e-48	1.34646e-46
CTLA4	6.10671	1.29463	3.79693	1.17359	2.30978	16.3701	8.5628e-48	1.37425e-46
SPHKAP	1.91265	2.03529	5.69753	2.22585	-3.78488	-16.3692	8.64402e-48	1.38603e-46
INPP1	7.7056	0.662265	8.804	0.313119	-1.0984	-16.3598	9.52492e-48	1.5245e-46
P2RY6	6.9114	1.08776	4.98551	0.948258	1.92589	16.3575	9.75668e-48	1.56018e-46
SAMD4A	8.14729	0.924833	9.79113	0.822257	-1.64383	-16.3536	1.01642e-47	1.62241e-46
UACA	10.3832	0.590728	11.3935	0.397772	-1.01034	-16.3518	1.03524e-47	1.65095e-46
TSEN54	9.19733	0.703087	7.95838	0.592761	1.23895	16.3441	1.12118e-47	1.7864e-46
ADM2	7.99395	1.18119	5.67047	1.56582	2.32348	16.3429	1.13533e-47	1.80731e-46
CFD	8.11005	1.91196	11.4713	1.61911	-3.36123	-16.3407	1.16122e-47	1.8452e-46
SELL	9.1233	1.31786	6.84352	1.00457	2.27977	16.3408	1.16034e-47	1.8452e-46
RLTPR	6.41393	1.59525	3.65132	1.22849	2.7626	16.3392	1.17926e-47	1.87217e-46
NFIB	10.9182	1.15001	12.7897	0.398639	-1.87151	-16.3303	1.29416e-47	2.05275e-46
ZNF204P	6.31203	1.37805	8.55876	0.515237	-2.24674	-16.3225	1.40233e-47	2.22233e-46
TAP1	12.0147	1.10807	10.1929	0.491928	1.82175	16.3209	1.42709e-47	2.25954e-46
BCL6	10.0139	0.762707	11.3035	0.482076	-1.2896	-16.3108	1.5833e-47	2.50462e-46
IQSEC3	3.92257	1.30165	6.22259	1.14383	-2.30002	-16.3082	1.62719e-47	2.56944e-46
CXCR5	5.64237	1.72915	2.67424	1.27204	2.96813	16.3022	1.73159e-47	2.73186e-46
BDH2	8.90156	0.628197	9.94482	0.318976	-1.04325	-16.2979	1.81129e-47	2.85505e-46
C19orf69	0.471259	0.512563	1.61401	0.922138	-1.14275	-16.2929	1.90707e-47	3.00334e-46
RBP7	7.39528	1.3559	9.71471	0.974624	-2.31943	-16.2903	1.95877e-47	3.07927e-46
ANKRD22	7.67675	1.26685	5.24601	1.57129	2.43074	16.2898	1.97045e-47	3.09486e-46
IKBKE	8.6798	0.803894	7.18318	0.893371	1.49662	16.2876	2.01516e-47	3.16228e-46
CC2D2A	7.6585	0.815004	8.99436	0.346492	-1.33586	-16.2863	2.04127e-47	3.20041e-46
ROBO3	5.79328	1.13536	7.67801	0.606745	-1.88473	-16.2838	2.09598e-47	3.28327e-46
HN1L	12.1457	0.619917	11.0846	0.43809	1.06115	16.2781	2.22423e-47	3.48108e-46
NMNAT2	5.3104	1.5456	7.9805	1.20545	-2.6701	-16.2681	2.46681e-47	3.8539e-46
YIF1B	9.43069	0.674771	8.28818	0.44193	1.14251	16.2579	2.74208e-47	4.27639e-46
GRIN2B	0.862428	1.07083	2.8532	1.19863	-1.99077	-16.2498	2.98059e-47	4.64209e-46
PCDH18	8.65279	1.07309	10.5494	0.960138	-1.89657	-16.2498	2.98183e-47	4.64209e-46
HSH2D	7.99544	1.36723	5.63014	1.08488	2.3653	16.2451	3.12894e-47	4.86682e-46
CDC7	7.8567	1.03725	6.06601	0.809013	1.79069	16.2427	3.21012e-47	4.98868e-46
MOSC1	8.04785	1.03018	10.1822	1.5943	-2.13436	-16.2423	3.22117e-47	5.00146e-46
F3	8.35477	1.35142	10.5987	0.752405	-2.24391	-16.2415	3.24921e-47	5.04056e-46
SYNGR2	12.3476	0.663155	11.2319	0.412222	1.11571	16.2412	3.26003e-47	5.0529e-46
VAV2	10.1673	0.562085	9.11431	0.640769	1.05298	16.2395	3.31676e-47	5.13633e-46
ZNF25	8.10141	0.606945	9.155	0.482435	-1.05359	-16.236	3.44034e-47	5.32303e-46
DLC1	9.56617	1.00073	11.3436	0.922119	-1.7774	-16.2341	3.50697e-47	5.41663e-46
EBF2	3.7302	1.46595	6.35078	1.401	-2.62058	-16.2325	3.56682e-47	5.50426e-46
PTPRQ	1.80532	1.79032	5.21514	2.19873	-3.40982	-16.2258	3.82342e-47	5.89507e-46
BHMT2	5.53456	1.42424	8.25796	1.77335	-2.7234	-16.2176	4.15981e-47	6.40814e-46
CENPO	7.26375	0.758122	5.97959	0.516233	1.28415	16.2054	4.72477e-47	7.27211e-46
LOC339290	8.69393	0.714161	9.89951	0.471164	-1.20558	-16.2028	4.85173e-47	7.46101e-46
RGNEF	8.07946	0.958209	9.65782	0.490867	-1.57837	-16.1989	5.049e-47	7.75088e-46
KLF10	10.5444	0.638342	11.7398	0.736124	-1.1953	-16.1977	5.11519e-47	7.84566e-46
C7orf51	2.77768	1.26647	4.88068	0.727931	-2.10301	-16.1964	5.18124e-47	7.93667e-46
DDR2	7.41408	1.36849	9.92788	1.48429	-2.51379	-16.1964	5.18352e-47	7.93667e-46
MMD	8.53521	0.772646	10.4853	1.77278	-1.95006	-16.195	5.25887e-47	8.04506e-46
CCBE1	3.23413	1.26624	5.50057	1.2294	-2.26644	-16.1946	5.28256e-47	8.07432e-46
MXI1	9.56815	0.743368	10.8016	0.414368	-1.2335	-16.1917	5.44122e-47	8.30962e-46
SNRNP25	9.40957	0.696186	8.21503	0.526244	1.19455	16.186	5.77525e-47	8.81212e-46
RUNDC3B	4.90058	1.14007	6.77974	0.605559	-1.87916	-16.1763	6.38499e-47	9.71729e-46
VAMP8	11.3375	0.58525	10.1852	0.795139	1.15229	16.1739	6.53978e-47	9.9443e-46
GOLGA9P	0.612687	0.605425	1.9101	1.01968	-1.29741	-16.1674	7.00069e-47	1.06269e-45
SLC37A1	9.41268	0.698321	8.14678	0.716063	1.2659	16.1664	7.07282e-47	1.07179e-45
NANS	10.4418	0.652234	9.34312	0.428882	1.09869	16.1629	7.33327e-47	1.11031e-45
NRXN1	3.10473	1.84267	6.23162	1.32857	-3.12689	-16.1606	7.51127e-47	1.13628e-45
RAPGEF2	9.3143	0.617231	10.3584	0.420019	-1.04415	-16.1603	7.52852e-47	1.13792e-45
THRB	8.53691	1.26227	10.5681	0.431766	-2.03116	-16.1582	7.69402e-47	1.16193e-45
CTTNBP2	5.08835	1.62431	7.71328	0.631677	-2.62493	-16.1578	7.72954e-47	1.1663e-45
CYBRD1	11.6971	1.20256	13.6889	0.690909	-1.99181	-16.1539	8.04501e-47	1.21287e-45
BAX	9.36272	0.706892	8.13216	0.595137	1.23056	16.1505	8.33486e-47	1.25549e-45
CXCR2P1	5.69107	2.03382	2.318	1.204	3.37307	16.145	8.82389e-47	1.32802e-45
PVRL3	5.26601	1.24637	7.36463	0.847836	-2.09861	-16.1423	9.078e-47	1.3651e-45
CUBN	5.03392	0.954529	6.71283	0.861929	-1.67891	-16.1375	9.53594e-47	1.43274e-45
CSRNP1	9.53426	0.887383	11.2503	1.15894	-1.71608	-16.1354	9.74935e-47	1.46356e-45
KCNMB1	6.7283	1.28558	9.1158	1.47547	-2.3875	-16.1292	1.03948e-46	1.55913e-45
GIMAP8	8.3544	0.833406	9.82349	0.762273	-1.46908	-16.124	1.09677e-46	1.64367e-45
CLEC4G	1.43455	1.31265	3.9587	1.69418	-2.52415	-16.1217	1.12324e-46	1.68049e-45
TMEM195	1.95841	1.34341	4.40335	1.43017	-2.44494	-16.1217	1.12287e-46	1.68049e-45
GBE1	8.88802	0.627019	10.244	1.08533	-1.35599	-16.1162	1.18853e-46	1.77666e-45
PAK7	2.40119	1.70671	5.68169	2.20583	-3.28051	-16.1127	1.232e-46	1.84009e-45
RPUSD1	9.04025	0.761347	7.74291	0.56866	1.29733	16.1106	1.25999e-46	1.8803e-45
TMEM88	4.77518	1.11784	6.65787	0.773334	-1.88269	-16.1092	1.2773e-46	1.90451e-45
S100P	8.2413	2.81938	3.52784	1.85351	4.71346	16.1053	1.33027e-46	1.98014e-45
PI16	6.26442	2.39315	10.3835	1.95099	-4.11912	-16.1035	1.35525e-46	2.01563e-45
LOC144571	4.77479	0.758884	6.08938	0.633118	-1.31459	-16.1031	1.3606e-46	2.0219e-45
HMGA1	11.1006	0.981573	9.4142	0.784819	1.68642	16.1003	1.40039e-46	2.07926e-45
KLHL21	9.94073	0.756985	11.1754	0.35959	-1.23465	-16.0998	1.40823e-46	2.08915e-45
ANKAR	4.48791	0.749442	5.75885	0.542752	-1.27094	-16.099	1.41981e-46	2.10456e-45
ZDHHC12	9.43756	0.711425	8.24198	0.477435	1.19559	16.0987	1.42483e-46	2.11023e-45
SCN2A	4.13611	1.73226	7.18867	1.61071	-3.05256	-16.0951	1.47844e-46	2.1878e-45
ABCD2	4.83212	1.3131	7.55105	2.07681	-2.71893	-16.0938	1.49855e-46	2.2157e-45
ARHGEF6	10.0073	0.876101	11.515	0.708881	-1.50775	-16.09	1.55833e-46	2.30215e-45
DNAH14	7.21895	0.805397	5.62396	1.13435	1.59499	16.0899	1.55967e-46	2.30221e-45
LOC100128191	6.1858	0.841927	4.77691	0.551705	1.40888	16.0895	1.56669e-46	2.31064e-45
TACR1	5.61692	1.74354	8.46396	0.894528	-2.84704	-16.0795	1.73748e-46	2.56039e-45
NUDT7	5.71126	0.926345	7.22368	0.464541	-1.51242	-16.0774	1.77454e-46	2.61282e-45
FGFBP2	3.40753	1.68881	6.54875	1.9741	-3.14122	-16.0773	1.77645e-46	2.61346e-45
ALDOC	7.83663	1.31088	10.0663	0.997138	-2.22968	-16.0716	1.88379e-46	2.76906e-45
PRDM5	4.65477	1.13822	6.49469	0.497217	-1.83991	-16.062	2.08202e-46	3.0579e-45
LOC284578	2.31622	1.81159	5.2643	0.899634	-2.94808	-16.0614	2.09363e-46	3.0724e-45
FAT4	7.51186	1.29531	9.64389	0.745854	-2.13203	-16.0527	2.29148e-46	3.35716e-45
SLC10A6	2.83317	1.35374	5.13353	1.03206	-2.30035	-16.0518	2.31182e-46	3.38415e-45
CCDC158	2.8464	1.64718	5.56102	0.974938	-2.71462	-16.0398	2.61668e-46	3.82725e-45
CX3CL1	10.2317	1.36779	12.5828	1.12995	-2.35115	-16.0377	2.67563e-46	3.91022e-45
C20orf24	10.6715	0.641277	9.61816	0.350736	1.0533	16.0338	2.78577e-46	4.06782e-45
HOXA9	5.18677	1.51911	7.65812	0.773898	-2.47135	-16.0246	3.06168e-46	4.46702e-45
TMED3	11.5614	0.638964	10.3043	0.891171	1.25707	16.0223	3.13461e-46	4.56964e-45
RHOU	8.82776	1.03646	10.5327	0.602451	-1.7049	-16.0194	3.23101e-46	4.7063e-45
AOX1	7.0442	1.58654	9.76555	1.30669	-2.72135	-16.0151	3.37618e-46	4.91369e-45
MRPL14	9.75879	0.722953	8.55546	0.467551	1.20332	16.012	3.48631e-46	5.0698e-45
C20orf103	7.46272	1.56721	4.65631	1.60766	2.80641	16.0085	3.614e-46	5.25115e-45
JAM3	8.84946	0.888149	10.2766	0.361436	-1.42711	-16.0065	3.68944e-46	5.35637e-45
LOXL4	6.45428	1.57003	9.00116	0.781446	-2.54688	-16.0051	3.7455e-46	5.43329e-45
HYAL1	5.36738	1.11093	7.21289	0.72747	-1.84551	-15.9908	4.34024e-46	6.29085e-45
ANK2	7.95861	1.21877	10.1047	1.16458	-2.14613	-15.985	4.60606e-46	6.66519e-45
ARHGEF15	8.05439	0.938778	9.6985	0.870853	-1.64411	-15.9829	4.7097e-46	6.80959e-45
PFKFB3	10.8712	0.962038	12.695	1.21787	-1.82374	-15.9815	4.77487e-46	6.89344e-45
SOX17	5.94297	1.10363	7.89297	1.07151	-1.95	-15.9815	4.77551e-46	6.89344e-45
MEOX1	6.6243	1.46631	9.05579	0.958668	-2.43149	-15.9746	5.12734e-46	7.39526e-45
SASH1	10.0777	0.994935	11.6837	0.467766	-1.60609	-15.9666	5.5701e-46	8.02731e-45
GLDN	5.17828	1.43911	7.72041	1.40989	-2.54213	-15.9549	6.28222e-46	9.03977e-45
PTPRB	9.05089	1.11695	10.9511	0.89394	-1.90026	-15.947	6.81544e-46	9.79005e-45
FBXO6	8.72254	0.700636	7.56348	0.444242	1.15906	15.9441	7.02259e-46	1.00794e-44
LOC201651	0.880227	0.835647	2.43945	1.01258	-1.55922	-15.9355	7.67708e-46	1.10009e-44
NCALD	8.74525	1.26326	10.8334	0.821974	-2.08816	-15.928	8.29742e-46	1.18802e-44
FAM110A	9.20927	0.838128	7.71099	0.869529	1.49828	15.9139	9.59314e-46	1.37131e-44
SPG20	9.66802	0.782927	10.9205	0.32526	-1.25247	-15.9093	1.0056e-45	1.43515e-44
F12	6.62965	1.48432	3.99807	1.49766	2.63158	15.9091	1.00729e-45	1.43641e-44
YDJC	8.36531	0.849675	6.82907	0.924622	1.53624	15.9081	1.01826e-45	1.45088e-44
TAPBP	12.5916	0.636466	11.5344	0.424983	1.05721	15.9071	1.02818e-45	1.46383e-44
ZNF483	3.81618	1.1259	5.75829	0.994909	-1.9421	-15.8984	1.12504e-45	1.60044e-44
C1orf112	8.24241	0.7788	6.97499	0.43214	1.26742	15.8908	1.21716e-45	1.73009e-44
FOXP2	3.45213	1.51587	6.01592	1.20197	-2.56379	-15.8862	1.27594e-45	1.81218e-44
OASL	8.4882	1.43296	6.1351	0.900387	2.35311	15.886	1.27839e-45	1.8142e-44
PTPN6	10.1988	0.678668	8.97755	0.726451	1.22124	15.8798	1.36224e-45	1.92855e-44
TNFRSF10D	5.67271	1.34212	7.8245	0.62567	-2.15179	-15.8795	1.3663e-45	1.93275e-44
RIMBP2	2.38534	1.35849	4.60526	0.815283	-2.21992	-15.8786	1.37943e-45	1.94976e-44
CNKSR2	2.66724	1.45845	5.16493	1.25246	-2.49769	-15.8744	1.44052e-45	2.03448e-44
AIM2	5.60474	1.57991	3.00431	1.02494	2.60043	15.8715	1.48433e-45	2.09468e-44
TMOD1	7.16087	1.04023	8.92294	0.834673	-1.76207	-15.8683	1.53394e-45	2.16295e-44
CYP46A1	3.51299	1.05443	5.26759	0.747201	-1.7546	-15.8659	1.57279e-45	2.21597e-44
SAA1	8.72613	2.20493	12.4346	1.70569	-3.70844	-15.8631	1.61782e-45	2.27759e-44
TOMM40	10.1537	0.728204	8.93255	0.541531	1.22115	15.8598	1.674e-45	2.3548e-44
C6orf115	9.76023	0.85361	8.30747	0.704347	1.45277	15.8595	1.67941e-45	2.36053e-44
KLHDC1	5.33117	1.05766	7.02356	0.482822	-1.69239	-15.8575	1.7136e-45	2.40667e-44
C20orf20	8.76428	0.644121	7.72425	0.324853	1.04004	15.857	1.7227e-45	2.41753e-44
C8orf79	5.78839	1.66252	8.47711	0.911141	-2.68872	-15.8452	1.94664e-45	2.72746e-44
FEZ1	6.37296	1.01045	8.04861	0.704567	-1.67565	-15.8411	2.0293e-45	2.83877e-44
NRG2	3.51654	1.85437	6.49453	0.929352	-2.97799	-15.8408	2.03662e-45	2.84676e-44
CNRIP1	7.3233	0.857152	8.88414	0.974946	-1.56084	-15.8366	2.12519e-45	2.96821e-44
COBLL1	9.18038	0.861027	10.6892	0.837503	-1.50879	-15.8302	2.27123e-45	3.16966e-44
SNTG2	1.51754	1.36162	3.90598	1.33861	-2.38844	-15.83	2.27439e-45	3.17157e-44
FAM89A	6.6546	1.00243	8.63634	1.47111	-1.98174	-15.8275	2.33356e-45	3.25151e-44
STXBP2	10.6016	0.655766	9.15549	1.22802	1.44611	15.8247	2.40276e-45	3.3453e-44
ADCY4	7.28541	1.00426	8.93789	0.663825	-1.65248	-15.8174	2.59058e-45	3.60395e-44
ZNF668	8.18907	0.667275	7.06558	0.520098	1.12349	15.8073	2.87434e-45	3.99556e-44
PDE7B	6.00509	1.02186	7.67606	0.642018	-1.67097	-15.8059	2.91415e-45	4.04772e-44
HIST1H2BO	2.62661	1.43475	0.361642	0.544832	2.26497	15.7962	3.21958e-45	4.46844e-44
C14orf128	5.36343	0.831277	6.71834	0.505391	-1.35492	-15.7923	3.35179e-45	4.64828e-44
RGS7BP	2.57176	1.43549	4.96093	1.06768	-2.38917	-15.7788	3.85279e-45	5.33886e-44
RHOQ	10.4967	0.564001	11.682	0.959415	-1.18531	-15.7769	3.92652e-45	5.43677e-44
SH3TC2	4.85017	1.21305	6.80835	0.682006	-1.95819	-15.7735	4.06804e-45	5.6283e-44
JPH2	5.85345	1.71174	8.66696	1.16067	-2.81352	-15.772	4.12995e-45	5.70949e-44
DRP2	4.11754	1.10399	2.17277	1.12215	1.94477	15.7717	4.1421e-45	5.7218e-44
LOC400804	0.548095	0.574629	1.73089	0.933981	-1.18279	-15.769	4.26011e-45	5.88022e-44
TTC23	7.94642	0.695078	9.04091	0.239812	-1.09449	-15.763	4.52935e-45	6.24696e-44
FCRL3	5.36981	1.65368	2.61638	1.24714	2.75344	15.7578	4.77746e-45	6.58401e-44
ARHGAP24	7.55045	0.799814	8.86997	0.554302	-1.31952	-15.7552	4.90917e-45	6.76025e-44
FAM172A	8.70787	0.651166	9.754	0.336827	-1.04613	-15.7509	5.12798e-45	7.05057e-44
C15orf42	7.39408	1.29991	5.28687	0.780474	2.10721	15.7496	5.19975e-45	7.14368e-44
TEAD1	10.2132	0.812661	11.611	0.740598	-1.39784	-15.7429	5.56777e-45	7.64335e-44
DKK4	0.48107	0.885821	2.11425	1.07527	-1.63318	-15.7411	5.67339e-45	7.7778e-44
PCDHGA6	4.52643	1.14672	6.36266	0.595814	-1.83624	-15.7411	5.67453e-45	7.7778e-44
FLJ42875	1.72952	1.12648	3.6195	0.897662	-1.88998	-15.7375	5.88541e-45	8.06059e-44
RAD54B	7.49992	1.01956	5.84117	0.643642	1.65875	15.7178	7.20742e-45	9.85591e-44
LMX1A	1.50962	1.16605	3.78296	1.68186	-2.27334	-15.717	7.26905e-45	9.93249e-44
LOC339524	6.44145	1.13527	8.51842	1.35393	-2.07697	-15.7127	7.59181e-45	1.03655e-43
FLRT2	7.78597	1.28677	9.8366	0.646055	-2.05062	-15.7081	7.96024e-45	1.08601e-43
MBOAT7	10.7617	0.719124	9.54158	0.614161	1.22017	15.7048	8.23484e-45	1.12261e-43
TRAIP	6.83992	0.738287	5.56642	0.690541	1.2735	15.6984	8.79293e-45	1.19684e-43
C21orf45	8.35008	0.654485	7.28527	0.409648	1.06481	15.6929	9.30312e-45	1.26531e-43
SLC4A4	4.40957	1.6871	7.38069	1.75525	-2.97112	-15.6925	9.33994e-45	1.26934e-43
CDH5	9.80624	0.851209	11.281	0.819045	-1.47471	-15.6865	9.94037e-45	1.34717e-43
GREM2	4.18753	1.64273	6.87321	1.11424	-2.68568	-15.6865	9.94316e-45	1.34717e-43
GPR84	5.33756	1.23653	3.20204	1.17954	2.13553	15.6837	1.02307e-44	1.38507e-43
GPR68	7.77174	0.954696	6.1899	0.713584	1.58184	15.6808	1.05358e-44	1.42528e-43
OGN	7.32523	2.43822	11.1707	1.08661	-3.84546	-15.6725	1.14731e-44	1.5497e-43
MFAP4	9.67589	1.53367	12.2201	1.17032	-2.54419	-15.6717	1.15702e-44	1.56162e-43
C21orf58	6.91449	0.974322	5.30597	0.713474	1.60852	15.6692	1.18681e-44	1.59938e-43
APOO	8.27486	0.628302	7.26451	0.353068	1.01035	15.6601	1.30276e-44	1.75133e-43
COL4A3BP	9.66355	0.656579	10.7669	0.536395	-1.10335	-15.6601	1.30353e-44	1.75133e-43
IDH2	11.9365	0.817481	10.527	0.775753	1.40953	15.6542	1.38435e-44	1.8585e-43
DUSP1	11.1775	1.32774	13.358	0.952392	-2.18054	-15.6433	1.54803e-44	2.07666e-43
GGCT	11.0084	0.758792	9.7747	0.491687	1.23371	15.6427	1.55776e-44	2.08813e-43
DMRT2	3.45053	1.47508	6.03575	1.5244	-2.58522	-15.6394	1.61151e-44	2.1579e-43
RCAN1	10.0879	1.09887	11.9347	0.919405	-1.8468	-15.6393	1.61225e-44	2.1579e-43
GABRA2	1.33974	1.34144	3.76621	1.56784	-2.42647	-15.631	1.75546e-44	2.34425e-43
DBNDD1	9.49333	1.07619	7.64905	1.00566	1.84428	15.6234	1.89798e-44	2.53264e-43
KREMEN2	5.03664	2.03822	1.79934	1.06421	3.2373	15.623	1.90682e-44	2.54252e-43
MCM4	10.9893	0.954801	9.43378	0.643962	1.55552	15.6217	1.93202e-44	2.57418e-43
FAM82A1	5.80464	0.752628	6.98523	0.30754	-1.18059	-15.6081	2.2214e-44	2.95751e-43
ID4	7.92832	1.74417	10.6665	0.76794	-2.73821	-15.606	2.26757e-44	3.01671e-43
PGP	8.71391	0.709886	7.56005	0.467106	1.15386	15.605	2.29306e-44	3.04832e-43
C16orf53	10.3055	0.640717	9.25774	0.441635	1.04772	15.6025	2.35131e-44	3.1234e-43
DTYMK	8.95188	0.683508	7.84084	0.449532	1.11105	15.6023	2.35623e-44	3.12758e-43
CBX4	9.64756	0.857474	8.22266	0.675147	1.4249	15.6007	2.394e-44	3.17534e-43
ADIPOQ	7.76915	3.37198	13.3998	2.77834	-5.63067	-15.598	2.4617e-44	3.26267e-43
VWCE	3.32293	1.17121	5.25343	0.881441	-1.93051	-15.5942	2.55876e-44	3.38624e-43
EPSTI1	8.62131	1.07227	6.82789	0.886503	1.79343	15.5941	2.56367e-44	3.39019e-43
CD6	8.24473	1.22328	6.23337	0.906173	2.01136	15.5917	2.62575e-44	3.46708e-43
TMEM37	7.38182	1.09405	9.57909	1.73395	-2.19727	-15.5917	2.62546e-44	3.46708e-43
C11orf82	7.42007	1.025	5.73618	0.755267	1.6839	15.5821	2.89798e-44	3.82369e-43
ARPC1B	11.6418	0.781869	10.2858	0.778327	1.35598	15.5811	2.92757e-44	3.85985e-43
CDH23	6.24187	1.23778	8.33186	1.08844	-2.09	-15.5801	2.95644e-44	3.8921e-43
LTB	7.75536	1.87828	4.63226	1.51505	3.1231	15.5802	2.95455e-44	3.8921e-43
PRRT4	3.18757	1.69603	6.29307	2.09348	-3.1055	-15.5743	3.13715e-44	4.12691e-43
RNFT2	6.38757	1.14567	4.56761	0.618946	1.81997	15.5701	3.27556e-44	4.30578e-43
SAA2	6.95571	2.2655	10.7931	2.04386	-3.83739	-15.5663	3.40828e-44	4.47692e-43
PENK	2.59169	1.89376	5.93478	2.05728	-3.34309	-15.5649	3.45671e-44	4.53716e-43
TFR2	4.99972	1.6924	2.31787	0.899543	2.68185	15.5632	3.51653e-44	4.61225e-43
IRS2	8.93608	1.22226	10.8837	0.693824	-1.94765	-15.558	3.70911e-44	4.85761e-43
CABLES2	8.60052	0.739759	7.40131	0.489951	1.19921	15.5563	3.774e-44	4.93528e-43
STXBP1	8.80029	0.887588	10.2391	0.593802	-1.4388	-15.5534	3.88753e-44	5.07998e-43
GPR124	9.76313	0.896525	11.2473	0.704574	-1.48419	-15.5496	4.04236e-44	5.27449e-43
SGOL2	8.12253	0.797913	6.83463	0.513193	1.2879	15.5462	4.18641e-44	5.45841e-43
FOS	11.4624	1.64489	14.2317	1.44458	-2.76935	-15.5459	4.19586e-44	5.46669e-43
ATP1A3	4.91029	1.66866	2.2473	0.982044	2.66299	15.5406	4.43285e-44	5.76695e-43
ACSL1	11.0071	1.06935	13.0982	1.60111	-2.09107	-15.5363	4.63326e-44	6.02323e-43
AMOTL1	9.80955	1.03766	11.4208	0.392518	-1.6113	-15.527	5.09375e-44	6.617e-43
CLEC1A	5.83042	0.817635	7.19887	0.692111	-1.36845	-15.5263	5.12737e-44	6.65577e-43
TIMM17B	9.49166	0.707698	8.34813	0.462213	1.14353	15.5255	5.17415e-44	6.71157e-43
SHMT1	9.11787	0.626477	10.2121	0.650283	-1.09421	-15.52	5.47193e-44	7.08741e-43
PRKAR2B	9.62863	1.06616	11.7314	1.63842	-2.10278	-15.5076	6.2136e-44	8.03626e-43
MAP7D3	7.28642	0.944952	8.91563	0.939659	-1.62921	-15.5059	6.31704e-44	8.16406e-43
GPR133	5.52125	1.4305	7.99003	1.43525	-2.46877	-15.5054	6.35313e-44	8.2047e-43
TCF7L2	9.16369	0.760912	10.3632	0.382506	-1.19955	-15.505	6.37524e-44	8.22722e-43
ECSCR	6.32558	0.972538	7.93055	0.765592	-1.60497	-15.5018	6.59252e-44	8.50142e-43
LOC285830	4.64886	0.861418	6.03361	0.553487	-1.38474	-15.4908	7.37852e-44	9.50806e-43
HCG11	8.40937	0.832358	9.71605	0.401299	-1.30668	-15.4906	7.39201e-44	9.51849e-43
IGFL2	3.82481	1.71115	1.05917	1.17782	2.76565	15.4812	8.13269e-44	1.04418e-42
SGCB	9.59833	0.69711	10.7806	0.642113	-1.18225	-15.476	8.57551e-44	1.09943e-42
HIST1H2BD	8.97744	1.3624	6.69659	1.18844	2.28085	15.4732	8.83228e-44	1.13153e-42
CD2	9.06809	1.15055	7.14668	0.989695	1.92141	15.468	9.31447e-44	1.19158e-42
PTPRM	9.50708	0.907035	11.0521	0.862008	-1.54499	-15.4667	9.43474e-44	1.20609e-42
GRAMD3	8.86514	0.708057	10.2671	1.10228	-1.40195	-15.4654	9.56336e-44	1.22165e-42
PSD2	2.65594	1.25137	4.89912	1.47234	-2.24318	-15.4591	1.01937e-43	1.30123e-42
IGSF9	9.67876	1.05727	7.2013	2.31809	2.47746	15.4564	1.04774e-43	1.33647e-42
SNRPA1	9.10138	0.73049	7.97166	0.270353	1.12973	15.449	1.13023e-43	1.43962e-42
SKAP2	9.23225	0.747887	10.4156	0.415776	-1.18333	-15.4433	1.19865e-43	1.52456e-42
SOD3	8.04004	1.41364	10.3792	1.16723	-2.33914	-15.4405	1.2335e-43	1.56776e-42
EGFR	7.91941	1.82395	10.7383	0.725432	-2.81894	-15.4402	1.23674e-43	1.57075e-42
VWF	11.7911	1.00435	13.5391	1.06178	-1.74802	-15.4337	1.32212e-43	1.67799e-42
FOXO4	8.82378	0.686994	9.91607	0.404697	-1.09229	-15.4319	1.3457e-43	1.70668e-42
ELTD1	9.19793	0.874153	10.701	0.876269	-1.50305	-15.4315	1.35152e-43	1.71283e-42
RIBC2	5.36606	1.09646	3.44455	1.19572	1.92151	15.4236	1.46504e-43	1.85537e-42
OLFML2A	9.44751	0.938486	10.9118	0.446188	-1.46427	-15.4182	1.54854e-43	1.95971e-42
DNAJC5B	4.27345	1.36786	1.93529	1.34977	2.33817	15.4137	1.62139e-43	2.05043e-42
SLC25A39	11.3882	0.666551	10.332	0.384427	1.05622	15.4054	1.76501e-43	2.22727e-42
C8orf51	6.4711	0.961431	4.84968	0.889031	1.62142	15.402	1.82668e-43	2.30345e-42
GRM8	2.91548	1.12526	1.07397	0.877674	1.84151	15.401	1.84543e-43	2.32543e-42
MRPL13	9.87951	0.708582	8.78012	0.302933	1.09939	15.3979	1.90506e-43	2.39885e-42
SSX2IP	9.33096	0.671978	8.09954	0.85565	1.23142	15.3965	1.93281e-43	2.43206e-42
PRNP	10.8997	0.854354	12.2286	0.392453	-1.3289	-15.3954	1.9541e-43	2.4571e-42
FCGR1C	5.41593	1.06772	3.51726	1.23792	1.89867	15.3944	1.97462e-43	2.48114e-42
LRFN5	3.84309	1.3882	6.05787	0.900591	-2.21479	-15.3813	2.25609e-43	2.83279e-42
APBA1	6.78052	1.12839	8.52449	0.479806	-1.74397	-15.3778	2.33851e-43	2.93419e-42
MT1M	4.61844	1.56247	7.09162	0.943682	-2.47318	-15.3751	2.40417e-43	3.01443e-42
ZNF132	6.05432	0.781532	7.27904	0.413434	-1.22472	-15.3593	2.82349e-43	3.53517e-42
GOLGA6L5	4.1715	1.13992	5.96471	0.648271	-1.79322	-15.3538	2.98759e-43	3.73798e-42
HCN2	3.73587	1.56271	1.31355	0.731664	2.42232	15.3529	3.01342e-43	3.76762e-42
UNC5B	10.1384	0.944736	8.65632	0.517623	1.48207	15.3488	3.14228e-43	3.92596e-42
PLAGL1	7.90754	1.12451	9.64716	0.507879	-1.73962	-15.3434	3.3209e-43	4.14619e-42
KLHL3	6.61195	0.919842	8.08589	0.627316	-1.47394	-15.3426	3.3489e-43	4.1782e-42
NR2F6	10.2289	0.702246	9.11438	0.433546	1.11454	15.3383	3.49547e-43	4.35799e-42
ACAD11	8.14672	0.683064	9.28855	0.611926	-1.14183	-15.3339	3.65814e-43	4.55436e-42
HPD	1.17688	1.3875	3.89827	2.1661	-2.72139	-15.3287	3.85563e-43	4.79009e-42
ADD3	10.346	0.874673	11.7328	0.545571	-1.38679	-15.3269	3.9299e-43	4.87893e-42
LOC257358	1.60354	0.766521	2.97756	0.924024	-1.37402	-15.3268	3.93391e-43	4.88048e-42
CHTF18	8.34296	1.07321	6.51802	1.06015	1.82494	15.3217	4.14224e-43	5.13533e-42
ACTA2	12.4268	1.0797	14.2228	0.956938	-1.79602	-15.3215	4.15165e-43	5.14338e-42
CRYBG3	7.97885	1.1618	9.81277	0.703422	-1.83392	-15.32	4.2141e-43	5.21709e-42
CCDC78	5.88122	1.86377	2.90078	1.28256	2.98044	15.3193	4.24504e-43	5.25171e-42
MXD3	7.64223	0.863085	6.25186	0.621289	1.39037	15.3167	4.35769e-43	5.3873e-42
RNASE7	2.14938	1.65129	4.96952	1.67341	-2.82014	-15.312	4.57364e-43	5.64637e-42
CHD9	9.71119	0.796943	10.9807	0.522885	-1.26949	-15.3094	4.69664e-43	5.79417e-42
ARRB1	8.93058	0.780385	10.1506	0.418644	-1.22006	-15.3069	4.81599e-43	5.93311e-42
SLC22A3	5.25838	1.56717	7.79443	1.18634	-2.53606	-15.3057	4.87599e-43	6.00284e-42
CCDC19	5.96755	1.51696	3.53674	1.06713	2.43081	15.3051	4.90316e-43	6.03209e-42
CTPS	9.56381	0.832879	8.25028	0.498488	1.31353	15.3034	4.98918e-43	6.13364e-42
OCIAD2	9.66166	0.634426	8.55496	0.695595	1.1067	15.2937	5.50828e-43	6.7671e-42
PPM1F	9.44185	0.644215	10.4461	0.330675	-1.00423	-15.2902	5.70798e-43	7.00756e-42
KATNAL1	8.30578	0.659183	9.40125	0.581563	-1.09547	-15.2837	6.09685e-43	7.47977e-42
LRP4	6.24374	1.25913	8.22615	0.762497	-1.98241	-15.2831	6.1379e-43	7.52489e-42
TRPC6	5.96152	1.00103	7.53955	0.61021	-1.57803	-15.2823	6.18532e-43	7.57777e-42
DHDPSL	2.80487	1.65435	5.44942	1.15891	-2.64455	-15.2779	6.4692e-43	7.91457e-42
IL2RG	9.88156	1.155	8.03636	0.802488	1.8452	15.2739	6.74065e-43	8.24095e-42
EPYC	4.3895	2.48001	0.637575	0.735592	3.75192	15.2677	7.17394e-43	8.76462e-42
CNTN6	1.14571	1.18945	3.17169	1.20774	-2.02598	-15.2562	8.06931e-43	9.83809e-42
CRB3	7.97837	0.707241	6.04757	2.00519	1.9308	15.2562	8.065e-43	9.83809e-42
PSENEN	10.4855	0.650012	9.46724	0.366547	1.01827	15.2559	8.0911e-43	9.85785e-42
YPEL4	3.89387	0.99672	5.49493	0.734142	-1.60106	-15.2352	9.98938e-43	1.21622e-41
RUNX1T1	4.83282	1.49809	7.15797	0.806277	-2.32515	-15.226	1.09712e-42	1.33485e-41
PPP4R1L	5.2405	0.954555	6.7402	0.584973	-1.49969	-15.2202	1.16391e-42	1.41221e-41
ATP1B2	5.10836	1.25041	7.0192	0.524678	-1.91085	-15.2192	1.17488e-42	1.42454e-41
ARHGAP10	8.05525	0.780422	9.31522	0.596221	-1.25997	-15.2176	1.19504e-42	1.44752e-41
C20orf160	6.1048	0.930333	7.61666	0.746437	-1.51185	-15.2174	1.19676e-42	1.44808e-41
GRM4	4.923	2.17676	1.55883	1.12326	3.36417	15.2158	1.21718e-42	1.47078e-41
LPAR2	8.72414	0.656381	7.37509	1.15395	1.34905	15.2094	1.2985e-42	1.56797e-41
PLP1	4.18465	2.14804	7.46134	0.895476	-3.27669	-15.2091	1.3024e-42	1.5716e-41
IL18	7.90239	0.983336	6.32442	0.728105	1.57797	15.2083	1.31336e-42	1.58375e-41
ADORA2A	8.00687	1.29515	6.0184	0.604667	1.98847	15.2041	1.37102e-42	1.65102e-41
C1orf183	5.12205	1.03826	6.75721	0.661764	-1.63516	-15.201	1.41473e-42	1.7025e-41
GIYD2	9.03926	0.876817	7.65814	0.557629	1.38112	15.1967	1.47781e-42	1.77599e-41
ABCG2	5.69396	1.34912	7.80405	0.811836	-2.11009	-15.1938	1.52189e-42	1.82772e-41
LIG1	9.68767	0.601478	8.48924	0.989085	1.19844	15.1917	1.55367e-42	1.86461e-41
EIF4E3	9.39317	0.732718	10.5671	0.536893	-1.17396	-15.1842	1.67719e-42	2.01149e-41
FHOD3	7.4455	1.11241	9.19842	0.723123	-1.75292	-15.1806	1.74054e-42	2.08605e-41
PTGFR	5.36183	1.60691	7.91215	1.12026	-2.55031	-15.177	1.80525e-42	2.16214e-41
TCP11L2	6.64602	1.01657	8.24596	0.654563	-1.59994	-15.1734	1.87189e-42	2.24043e-41
DOK3	7.75952	0.853116	6.35892	0.739508	1.4006	15.17	1.93755e-42	2.31745e-41
LPCAT2	8.79905	0.800402	10.0787	0.584532	-1.27965	-15.1663	2.01214e-42	2.40504e-41
SH3BP1	8.86201	0.820689	7.48844	0.787352	1.37357	15.1608	2.12689e-42	2.54046e-41
EPM2A	7.05012	0.604	8.08703	0.642424	-1.03691	-15.1607	2.13001e-42	2.54247e-41
LPPR1	2.25184	1.65464	5.01453	1.58288	-2.76269	-15.1605	2.13396e-42	2.54546e-41
BMP5	2.19673	2.06862	5.40567	1.17459	-3.20894	-15.1574	2.20115e-42	2.62207e-41
SLC7A5	10.8884	1.49146	8.44079	1.30781	2.44757	15.1552	2.25079e-42	2.67939e-41
PPARA	8.26389	0.913256	9.71163	0.632981	-1.44775	-15.1486	2.40806e-42	2.86468e-41
ABCC9	7.52266	1.21445	9.65637	1.43067	-2.13371	-15.1455	2.48478e-42	2.95395e-41
TF	6.73717	2.43736	10.4967	1.30808	-3.75952	-15.1427	2.55656e-42	3.03725e-41
EPDR1	7.49081	1.12622	9.33446	0.978598	-1.84365	-15.1345	2.77871e-42	3.29894e-41
NTF3	2.5412	1.47922	4.88694	1.0509	-2.34575	-15.1268	3.00274e-42	3.56253e-41
MYL9	11.8487	1.01779	13.4484	0.666068	-1.59975	-15.1267	3.0081e-42	3.56649e-41
PRIMA1	5.69087	1.52306	8.01004	0.676775	-2.31918	-15.1263	3.01852e-42	3.57645e-41
KCNA6	4.08693	1.36634	6.26981	1.02601	-2.18288	-15.1245	3.07492e-42	3.64082e-41
SFRP1	10.3782	2.55887	14.2529	1.03113	-3.87464	-15.1228	3.12751e-42	3.70061e-41
GULP1	6.83438	1.22593	8.70996	0.593165	-1.87558	-15.1153	3.37576e-42	3.99167e-41
TEK	7.91103	1.08072	9.66563	0.902176	-1.7546	-15.1131	3.45108e-42	4.07801e-41
SNX20	6.45816	1.12321	4.67571	0.807084	1.78245	15.1065	3.68916e-42	4.35351e-41
KIAA1614	5.05063	0.942029	6.54181	0.660766	-1.49118	-15.1061	3.70445e-42	4.36863e-41
C6orf125	9.85553	0.670622	8.79909	0.446869	1.05645	15.0962	4.09718e-42	4.82855e-41
KCNMB2	1.48572	1.0548	3.30557	1.17653	-1.81985	-15.094	4.18901e-42	4.93019e-41
TNNT3	2.90229	2.09068	6.352	1.93172	-3.44971	-15.0925	4.25458e-42	5.00402e-41
NEDD9	10.0274	0.948307	11.5342	0.690225	-1.5068	-15.0917	4.29017e-42	5.04252e-41
TRAF3IP3	7.85803	1.08995	6.10458	0.8696	1.75345	15.0858	4.55162e-42	5.34627e-41
SYNPO	10.5828	0.769146	12.0453	1.15279	-1.46246	-15.0857	4.5558e-42	5.34762e-41
SLC12A4	9.4158	0.667045	10.4655	0.443957	-1.04967	-15.0811	4.773e-42	5.59884e-41
TMOD2	8.22128	0.884675	9.58277	0.474914	-1.36148	-15.077	4.97622e-42	5.83335e-41
MRPS12	9.22184	0.79281	7.98281	0.503948	1.23903	15.0708	5.30151e-42	6.20643e-41
C3orf36	3.16168	0.973156	1.57896	0.834016	1.58272	15.0663	5.54999e-42	6.48871e-41
SLC7A3	2.18593	1.8663	5.46722	2.24826	-3.28129	-15.0661	5.55813e-42	6.49392e-41
KLF6	11.8117	0.753583	13.0788	0.758695	-1.26713	-15.0654	5.59948e-42	6.53792e-41
ANKDD1A	6.06113	0.743053	7.35841	0.867817	-1.29729	-15.0628	5.74791e-42	6.70235e-41
PCCA	8.20523	0.793114	9.44218	0.500344	-1.23696	-15.0516	6.43952e-42	7.50384e-41
SEPP1	12.1602	1.28012	14.0944	0.537453	-1.93423	-15.0484	6.65004e-42	7.74405e-41
DSC1	2.51293	1.45537	5.20727	2.05538	-2.69434	-15.0469	6.7531e-42	7.85888e-41
HSPE1	10.8625	0.712577	9.77735	0.332011	1.08513	15.043	7.02404e-42	8.16881e-41
FAM189A2	6.61892	1.87931	9.54036	1.18362	-2.92144	-15.0404	7.21001e-42	8.37956e-41
NAB1	9.61473	0.665732	10.6426	0.375171	-1.02784	-15.0394	7.28287e-42	8.45867e-41
KLHL4	3.3932	1.22376	5.50752	1.39455	-2.11432	-15.0332	7.75529e-42	9.00144e-41
SLC4A5	8.08039	0.624064	7.01886	0.663173	1.06153	15.0288	8.10692e-42	9.39722e-41
TRIB3	9.68272	0.954969	8.09996	0.914543	1.58276	15.0282	8.15814e-42	9.45038e-41
GYPC	8.77191	0.933445	10.3023	0.847459	-1.53041	-15.0256	8.37865e-42	9.68812e-41
ODZ1	3.68371	1.58735	6.12884	0.916032	-2.44512	-15.0256	8.37983e-42	9.68812e-41
MAP4K1	7.7161	1.2113	5.75738	1.02525	1.95871	15.0215	8.72832e-42	1.00844e-40
ZNF677	4.7926	1.18485	6.57188	0.451394	-1.77929	-15.0178	9.06641e-42	1.04682e-40
KANK3	6.34931	1.06022	8.01863	0.750755	-1.66932	-15.0139	9.43211e-42	1.08833e-40
DPEP1	4.33008	1.67864	1.70819	1.13197	2.62188	14.9969	1.12053e-41	1.2904e-40
PCDHGA2	4.69765	1.66984	7.21503	0.725181	-2.51737	-14.996	1.12977e-41	1.30019e-40
LAMA3	8.89263	1.80129	11.6648	1.05439	-2.77219	-14.9955	1.13623e-41	1.30677e-40
PTCH1	7.17867	1.08586	8.81371	0.459271	-1.63504	-14.9842	1.274e-41	1.46332e-40
DBX2	2.1347	1.24164	4.09965	0.930662	-1.96495	-14.9828	1.29115e-41	1.48205e-40
BMP2	5.13642	1.40786	7.3943	1.15469	-2.25789	-14.9817	1.30659e-41	1.4988e-40
ASTN1	3.39684	1.65428	6.06379	1.40377	-2.66695	-14.9775	1.3633e-41	1.56283e-40
CYP7A1	0.779207	0.694877	1.91135	0.619536	-1.13214	-14.9605	1.61927e-41	1.85507e-40
TPRN	9.05535	1.0323	7.41065	0.818347	1.6447	14.9528	1.74892e-41	2.00229e-40
MRPS34	10.1833	0.777401	8.93979	0.634561	1.2435	14.9249	2.31836e-41	2.64908e-40
TIGD3	4.02174	0.989244	2.44833	0.786006	1.57341	14.9199	2.43837e-41	2.78261e-40
SOX5	3.95342	1.5452	6.42057	1.26687	-2.46715	-14.9182	2.48118e-41	2.82963e-40
HIST1H2BK	10.6569	1.23677	8.78701	0.612043	1.8699	14.9159	2.5402e-41	2.89507e-40
TMEM133	5.80119	0.802752	7.03522	0.480027	-1.23403	-14.9151	2.5613e-41	2.91724e-40
MASP2	3.80864	1.05068	5.47363	0.821166	-1.66499	-14.9056	2.81912e-41	3.20675e-40
NAP1L2	5.13834	1.43176	7.28618	0.636939	-2.14784	-14.8995	2.99717e-41	3.4049e-40
ABCB1	6.59342	1.20527	8.49101	0.905748	-1.8976	-14.8993	3.00201e-41	3.4082e-40
CHPF	11.1622	0.77696	9.92346	0.629223	1.23874	14.895	3.13599e-41	3.55802e-40
IRF9	10.801	0.770437	9.59439	0.55205	1.20664	14.8911	3.26127e-41	3.69778e-40
DNASE1L3	4.41412	1.63492	6.93929	1.06734	-2.52517	-14.884	3.50411e-41	3.97057e-40
ITGAX	8.95465	0.957622	7.30037	1.1283	1.65429	14.8822	3.56773e-41	4.04007e-40
NACAD	5.40913	1.3412	7.40355	0.511161	-1.99442	-14.8754	3.82246e-41	4.32298e-40
ZFP36	11.3067	1.14603	13.2439	1.2551	-1.93714	-14.8617	4.38788e-41	4.95609e-40
PACRG	2.50741	1.26762	4.55495	1.13699	-2.04754	-14.8502	4.92881e-41	5.5635e-40
LOC646982	0.954374	0.677789	2.15551	0.870434	-1.20113	-14.8492	4.97947e-41	5.6171e-40
LOC158376	4.19448	1.31718	6.27629	1.04423	-2.08181	-14.8424	5.33419e-41	6.01339e-40
COL1A1	16.3324	1.31157	14.0619	1.57532	2.27055	14.8415	5.38132e-41	6.06265e-40
TNNI3K	3.22902	1.60252	5.6299	0.754297	-2.40088	-14.8348	5.75546e-41	6.4759e-40
HRNR	2.39982	1.18936	4.37844	1.2311	-1.97862	-14.8339	5.80904e-41	6.53202e-40
H3F3A	12.4851	0.641223	11.472	0.498698	1.01302	14.8322	5.91112e-41	6.64258e-40
EFCAB1	2.99868	1.76088	5.90031	1.7579	-2.90163	-14.8253	6.33264e-41	7.09818e-40
MIF	11.9763	1.12678	10.1695	0.983051	1.80673	14.8133	7.15116e-41	8.00549e-40
XRCC2	6.31279	1.05977	4.61103	0.931584	1.70175	14.812	7.24039e-41	8.10025e-40
SAC3D1	7.84711	0.893834	6.43552	0.710992	1.41159	14.8059	7.70168e-41	8.61085e-40
OSCAR	6.74546	0.969565	5.15836	0.940264	1.5871	14.8038	7.8647e-41	8.782e-40
WDR76	7.94787	0.758325	6.78645	0.470988	1.16142	14.8002	8.15326e-41	9.09846e-40
HTR1D	3.83713	1.74713	1.24406	0.723221	2.59308	14.7998	8.19278e-41	9.13102e-40
C2CD2	9.53258	0.679568	10.8442	1.10614	-1.3116	-14.7913	8.91972e-41	9.93494e-40
C4orf31	4.77179	1.79496	7.47849	0.974677	-2.7067	-14.7864	9.3708e-41	1.04308e-39
PDLIM3	8.90211	1.23832	10.9306	1.21531	-2.02853	-14.7862	9.3895e-41	1.0445e-39
PLA2G4A	6.3819	1.38025	8.4411	0.650389	-2.0592	-14.7678	1.13024e-40	1.25571e-39
COPE	11.2161	0.666145	10.1702	0.513672	1.04585	14.763	1.18589e-40	1.31672e-39
NOD2	7.64337	1.01665	6.00841	0.917655	1.63496	14.7591	1.23381e-40	1.36905e-39
ZNF395	10.2484	0.735522	11.3471	0.344487	-1.09873	-14.7552	1.28343e-40	1.42233e-39
LAG3	6.90332	1.60027	4.48519	0.916076	2.41813	14.7503	1.34782e-40	1.49274e-39
HIST2H3C	2.47494	1.28299	0.574561	0.543395	1.90038	14.7458	1.41037e-40	1.56006e-39
DSEL	7.53772	1.20232	9.35032	0.67178	-1.8126	-14.7384	1.51949e-40	1.67971e-39
IER5L	8.39503	1.1016	6.63469	0.974572	1.76034	14.7243	1.75018e-40	1.93231e-39
ALAS2	0.400853	0.593734	2.18402	2.01235	-1.78317	-14.7152	1.91802e-40	2.11498e-39
KCNJ2	6.69066	1.04754	8.31497	0.770749	-1.62431	-14.7113	1.99594e-40	2.19814e-39
CCDC152	5.79551	1.08536	7.43018	0.613064	-1.63466	-14.7061	2.10121e-40	2.31264e-39
GPR19	4.81916	1.30289	2.86685	0.697378	1.95231	14.7021	2.18873e-40	2.40746e-39
CHAF1B	8.52758	0.868472	7.13736	0.780222	1.39022	14.6956	2.33544e-40	2.56724e-39
CDKN2D	7.82076	0.832057	6.52739	0.624019	1.29337	14.6952	2.34536e-40	2.57494e-39
SLC14A2	2.14252	1.56763	4.9076	2.06362	-2.76508	-14.6953	2.34418e-40	2.57494e-39
LPCAT1	10.8834	0.74323	9.76534	0.411715	1.1181	14.6871	2.54338e-40	2.78887e-39
MYO1G	7.92528	1.14279	6.11446	0.979117	1.81082	14.6867	2.55371e-40	2.79846e-39
PROX1	3.14194	1.654	5.71752	1.27733	-2.57558	-14.6866	2.55668e-40	2.79998e-39
PRELP	9.55736	1.48765	11.8855	1.18902	-2.32815	-14.6812	2.69926e-40	2.94881e-39
ZNF367	7.65039	0.988172	6.16202	0.568065	1.48838	14.6801	2.729e-40	2.97945e-39
MT1X	8.92193	1.27696	10.8521	0.775016	-1.93016	-14.6698	3.02676e-40	3.30249e-39
NCRNA00087	4.44298	1.18162	6.20328	0.599961	-1.76029	-14.6696	3.03263e-40	3.30686e-39
EYS	3.31418	1.01822	5.0715	1.25875	-1.75732	-14.6603	3.32868e-40	3.62744e-39
HFM1	1.31669	1.07844	3.04443	0.990151	-1.72774	-14.6571	3.4397e-40	3.74611e-39
PSMG3	9.18954	0.732846	8.08116	0.44223	1.10838	14.6534	3.56894e-40	3.88447e-39
KIFC2	9.15823	1.14392	7.42578	0.715235	1.73245	14.6512	3.64802e-40	3.96809e-39
UBE2Q2P1	3.48758	1.08918	5.18121	0.842539	-1.69363	-14.65	3.69293e-40	4.01447e-39
PARP12	10.1128	0.711587	9.04854	0.377894	1.0643	14.646	3.84311e-40	4.17515e-39
SAMD10	7.76526	0.763086	6.47665	0.875604	1.2886	14.6432	3.95174e-40	4.28715e-39
SLCO5A1	3.81588	1.39706	1.58994	1.25914	2.22595	14.6376	4.18265e-40	4.5301e-39
C13orf33	7.0638	1.28101	9.24004	1.51389	-2.17625	-14.6328	4.38606e-40	4.74458e-39
PNKD	10.3209	0.694963	9.27594	0.398149	1.04495	14.6312	4.45802e-40	4.81947e-39
MAPK13	10.1858	0.679132	8.90425	1.07601	1.28153	14.6288	4.56922e-40	4.93063e-39
ARHGAP6	5.71405	1.1391	7.42118	0.64946	-1.70713	-14.624	4.79161e-40	5.16745e-39
PRICKLE2	8.84773	1.12632	10.5278	0.60702	-1.68006	-14.6222	4.88105e-40	5.26068e-39
PTPN14	7.47111	1.13133	9.21398	0.831318	-1.74287	-14.6218	4.89942e-40	5.27727e-39
PRUNE2	6.84718	1.2526	8.80017	1.00225	-1.95299	-14.6193	5.02428e-40	5.40845e-39
RHBDF2	9.44514	0.759123	8.28517	0.517054	1.15996	14.6185	5.06361e-40	5.44747e-39
QKI	10.7155	0.6613	11.786	0.640386	-1.07056	-14.6169	5.14591e-40	5.53264e-39
ARAP3	8.087	0.806257	9.2994	0.473695	-1.2124	-14.614	5.29858e-40	5.69331e-39
RPS6KB2	9.62884	0.684976	8.58463	0.45595	1.04421	14.6129	5.35777e-40	5.75341e-39
LHX6	6.8374	1.01385	8.41888	0.820425	-1.58148	-14.5918	6.62109e-40	7.08416e-39
THOC4	10.0682	0.851733	8.78719	0.512158	1.28099	14.5892	6.79115e-40	7.26172e-39
MFSD2B	4.6919	1.12673	2.95951	0.829755	1.73239	14.5887	6.82537e-40	7.2939e-39
C10orf10	10.5958	1.1204	12.4268	1.15454	-1.83105	-14.5859	7.02014e-40	7.4975e-39
PREX2	5.2131	1.86238	8.05668	1.31125	-2.84358	-14.5855	7.05019e-40	7.52504e-39
GK	7.45224	0.762433	6.27852	0.561033	1.17372	14.5847	7.10831e-40	7.58248e-39
PDGFRA	10.137	1.08413	11.7372	0.521556	-1.60012	-14.5823	7.2824e-40	7.75882e-39
PLCXD3	3.87553	1.86988	6.73078	1.32126	-2.85525	-14.5801	7.44543e-40	7.92772e-39
FCGR1B	6.99076	1.03678	5.22411	1.25142	1.76665	14.5799	7.45866e-40	7.93702e-39
CD3D	7.60297	1.2547	5.652	1.00874	1.95097	14.5688	8.33181e-40	8.8555e-39
LOC728723	3.5829	0.813676	4.88511	0.762207	-1.30221	-14.5681	8.39135e-40	8.91341e-39
RNF125	7.92409	0.823903	9.21285	0.683333	-1.28875	-14.5615	8.96742e-40	9.51959e-39
ITGAL	9.69116	1.04551	8.07638	0.806217	1.61478	14.5563	9.44609e-40	1.00157e-38
C10orf128	4.26894	1.0641	5.91462	0.828323	-1.64568	-14.5562	9.45652e-40	1.00207e-38
LCK	8.30147	1.20279	6.43794	0.951659	1.86353	14.5513	9.93176e-40	1.0518e-38
UNC13C	1.18804	0.909537	2.75129	1.13567	-1.56324	-14.5497	1.00876e-39	1.06767e-38
VOPP1	10.4636	0.651172	9.45472	0.507216	1.00892	14.5448	1.05927e-39	1.12046e-38
BCL2L12	8.25311	0.839392	6.97781	0.571601	1.2753	14.5436	1.07239e-39	1.13365e-38
TINAGL1	9.26112	1.2477	11.0677	0.429159	-1.80654	-14.536	1.15723e-39	1.22188e-38
ABHD6	6.96809	0.726856	8.15941	0.764319	-1.19132	-14.5331	1.19117e-39	1.25696e-38
ZBP1	6.33602	1.54272	3.97921	1.11972	2.35682	14.533	1.19281e-39	1.25793e-38
SDF2L1	8.44246	0.91425	6.978	0.873166	1.46446	14.5303	1.2252e-39	1.29133e-38
ZNF296	6.61588	1.10913	4.68078	1.45953	1.93511	14.5295	1.23536e-39	1.30126e-38
AFAP1L1	7.76029	0.777864	9.11526	1.01598	-1.35497	-14.526	1.27944e-39	1.34608e-38
SHROOM4	7.83118	0.94486	9.25369	0.605674	-1.42251	-14.5175	1.39226e-39	1.46304e-38
CCR5	8.54244	1.0751	6.83675	0.986622	1.70569	14.5163	1.41018e-39	1.48098e-38
HIST1H2BE	3.68167	1.14895	1.94949	0.752065	1.73219	14.5142	1.43928e-39	1.51064e-38
APOC2	6.75806	1.4394	4.29689	1.78764	2.46117	14.5134	1.45145e-39	1.52251e-38
CSRP1	12.4111	0.751482	13.6864	0.907428	-1.27524	-14.5009	1.64356e-39	1.72301e-38
ZNF660	3.21191	1.01984	4.73477	0.61113	-1.52287	-14.5007	1.64665e-39	1.72522e-38
RGS2	8.9738	1.26683	10.998	1.21747	-2.02419	-14.4884	1.86237e-39	1.95007e-38
C14orf80	7.55969	1.05112	5.87149	1.03283	1.6882	14.4875	1.87956e-39	1.96691e-38
PPP1R14A	4.55069	1.72069	7.07497	0.851435	-2.52428	-14.4816	1.99344e-39	2.08485e-38
ETS2	10.1288	0.766987	11.2918	0.530189	-1.16297	-14.4814	1.99792e-39	2.08752e-38
THRA	9.10386	0.881017	10.3934	0.408877	-1.28959	-14.4814	1.99836e-39	2.08752e-38
SPINT2	13.2781	0.708343	11.5619	1.81929	1.71616	14.4769	2.08913e-39	2.18104e-38
PDE5A	8.2992	1.2594	10.1346	0.559366	-1.83543	-14.4722	2.19022e-39	2.28523e-38
DCAF13	10.4305	0.78727	9.28889	0.306764	1.1416	14.4629	2.40363e-39	2.50642e-38
LRRC59	11.9691	0.740057	10.8755	0.397606	1.09369	14.4626	2.40998e-39	2.51156e-38
CAMK2N2	4.29006	1.33065	2.29267	0.87158	1.99739	14.455	2.60216e-39	2.71024e-38
PHLDB1	10.6435	0.68158	11.7904	0.807188	-1.14693	-14.4535	2.64154e-39	2.74963e-38
LRCH2	5.03873	1.055	6.62944	0.717766	-1.59071	-14.4482	2.78383e-39	2.89604e-38
GPBAR1	3.75185	1.00217	5.68749	1.72748	-1.93564	-14.4455	2.85932e-39	2.97282e-38
ABLIM3	8.42226	1.5594	10.7226	0.860274	-2.30039	-14.4441	2.90008e-39	3.01342e-38
CMA1	2.45629	1.77606	5.29441	1.73995	-2.83812	-14.4371	3.10868e-39	3.22827e-38
LOC338758	4.67602	0.7987	5.86947	0.498982	-1.19346	-14.4357	3.15477e-39	3.27421e-38
NPAS4	1.04188	0.99085	2.67712	1.10568	-1.63524	-14.4339	3.21046e-39	3.33005e-38
SMAD9	4.18776	1.29746	6.11141	0.765393	-1.92365	-14.4284	3.39248e-39	3.51472e-38
CTNNAL1	8.643	0.752398	9.77975	0.520661	-1.13675	-14.4258	3.48194e-39	3.60317e-38
PROKR1	0.620812	1.01659	2.51637	1.62468	-1.89556	-14.4225	3.59807e-39	3.71247e-38
ALX4	2.01886	1.60063	4.58541	1.59912	-2.56655	-14.4222	3.60881e-39	3.72137e-38
THSD7B	4.19696	1.69521	6.68677	0.903552	-2.48981	-14.4217	3.62632e-39	3.73506e-38
RAB33A	4.65248	0.952797	3.19801	0.722011	1.45447	14.4188	3.73172e-39	3.84138e-38
C21orf62	0.984885	0.748902	2.2222	0.839306	-1.23731	-14.4171	3.79768e-39	3.90701e-38
LGR4	8.95803	1.18027	10.6637	0.477329	-1.70569	-14.4153	3.86537e-39	3.97433e-38
PUSL1	7.87778	0.825465	6.62466	0.602866	1.25312	14.4031	4.36601e-39	4.47864e-38
DKK3	9.63806	1.03998	11.2863	0.986886	-1.64821	-14.4017	4.42678e-39	4.53835e-38
LOC728819	3.44553	1.19854	5.17394	0.4782	-1.72841	-14.394	4.78049e-39	4.88962e-38
TPD52	12.2765	0.937467	10.6428	1.26245	1.63373	14.3934	4.81171e-39	4.9187e-38
FGF7	7.44331	1.18336	9.21642	0.79558	-1.77311	-14.3826	5.35751e-39	5.47347e-38
CPS1	5.49518	1.57179	7.76941	0.690842	-2.27423	-14.3824	5.36968e-39	5.48273e-38
CCNE1	6.83678	1.66007	4.44922	0.644906	2.38756	14.3812	5.43365e-39	5.54484e-38
GPR132	7.15559	0.921302	5.73167	0.768544	1.42392	14.381	5.44151e-39	5.54965e-38
DRD2	2.96694	1.74615	5.72871	1.66288	-2.76177	-14.3758	5.73368e-39	5.84088e-38
XPNPEP2	4.07156	1.43279	6.45331	1.67356	-2.38176	-14.3688	6.14789e-39	6.25201e-38
DGAT2	9.22497	1.45726	11.7967	2.04938	-2.57174	-14.3658	6.33455e-39	6.43812e-38
NOVA1	6.18898	2.1657	9.27864	0.698984	-3.08966	-14.3632	6.50149e-39	6.60399e-38
STAT1	13.18	0.970786	11.756	0.527729	1.42398	14.362	6.57384e-39	6.6698e-38
PNPLA2	10.8187	0.829419	12.3133	1.23005	-1.49461	-14.3604	6.68073e-39	6.77436e-38
PJA2	11.2165	0.703671	12.2438	0.353482	-1.02728	-14.3513	7.31826e-39	7.41231e-38
TCEAL2	3.1922	1.65487	5.68694	1.19829	-2.49474	-14.3468	7.65476e-39	7.74868e-38
ZDHHC15	5.04088	1.35173	6.97069	0.456809	-1.92981	-14.3438	7.88675e-39	7.97438e-38
CCDC82	7.94493	0.849909	9.1842	0.43141	-1.23926	-14.3407	8.13291e-39	8.21857e-38
HYMAI	1.11493	0.927552	2.55817	0.817734	-1.44324	-14.3384	8.31625e-39	8.39903e-38
PDP2	6.80226	0.817559	8.14529	0.917906	-1.34303	-14.3338	8.70681e-39	8.78845e-38
NAT14	8.13119	0.986596	6.56145	0.975711	1.56974	14.3288	9.15539e-39	9.23596e-38
PPL	10.1232	1.04777	11.6718	0.641171	-1.54863	-14.3255	9.46297e-39	9.53535e-38
TMEM35	3.31304	1.40892	5.4259	0.989975	-2.11286	-14.3237	9.62962e-39	9.69774e-38
DENND1C	8.13743	0.79996	6.74977	1.07644	1.38767	14.3228	9.72093e-39	9.77854e-38
SEMA5A	9.12418	1.19201	10.9825	1.07291	-1.8583	-14.3212	9.87122e-39	9.92406e-38
ADAMTSL4	7.74134	1.11539	9.50283	1.07003	-1.76149	-14.3212	9.87829e-39	9.92551e-38
MICAL2	10.8581	0.822184	9.61918	0.593413	1.23895	14.3192	1.0075e-38	1.01174e-37
PFKFB4	7.71588	0.688935	6.54715	0.865747	1.16873	14.3146	1.05446e-38	1.0583e-37
PFDN6	9.12942	0.742674	8.03261	0.450252	1.09681	14.3035	1.17809e-38	1.18036e-37
CENPH	7.64943	0.687585	6.61346	0.496242	1.03598	14.3014	1.20246e-38	1.2041e-37
WLS	9.36334	1.36813	11.3098	0.457542	-1.94642	-14.2989	1.23237e-38	1.23335e-37
LAMC1	12.0148	0.766253	13.2158	0.709979	-1.20108	-14.2953	1.27802e-38	1.27758e-37
PCDHB4	6.12619	1.20893	7.85162	0.443712	-1.72542	-14.2945	1.28726e-38	1.2861e-37
XIRP1	5.13829	1.89743	2.14814	1.82529	2.99015	14.2943	1.29039e-38	1.28849e-37
SETD7	10.9729	0.756703	12.1318	0.616661	-1.15891	-14.2918	1.32305e-38	1.31887e-37
CD99L2	9.75058	0.577445	10.7544	0.782499	-1.00381	-14.2916	1.32521e-38	1.32027e-37
PNP	10.0439	0.742942	8.92842	0.52751	1.11552	14.2897	1.35085e-38	1.34506e-37
SLA2	6.58079	1.18174	4.79785	0.88327	1.78294	14.288	1.37392e-38	1.36726e-37
WDR67	7.84997	0.81611	6.67308	0.367686	1.17689	14.2853	1.41106e-38	1.40343e-37
RETSAT	10.8678	0.724433	12.2426	1.22924	-1.37481	-14.2823	1.45407e-38	1.44539e-37
SLC24A2	3.03855	1.85072	0.403226	0.668068	2.63532	14.2813	1.46816e-38	1.45857e-37
GPR44	2.8777	1.10372	4.53765	0.810504	-1.65995	-14.2747	1.56833e-38	1.55722e-37
GAS2	3.32151	1.28149	5.2878	1.07758	-1.96629	-14.2715	1.61927e-38	1.60689e-37
PHLDB2	8.89094	1.05903	10.5051	0.85283	-1.61413	-14.2705	1.63459e-38	1.62118e-37
CNTFR	5.31133	2.3726	8.78805	1.40865	-3.47672	-14.2628	1.76496e-38	1.7495e-37
ALDH3A1	2.48988	1.92052	5.39551	1.49694	-2.90563	-14.252	1.96452e-38	1.94513e-37
CRTAC1	4.17792	1.94358	7.01043	1.09405	-2.83251	-14.2498	2.00864e-38	1.98658e-37
PTTG3P	1.73088	0.988724	0.312402	0.432909	1.41847	14.2467	2.07139e-38	2.04635e-37
ART4	1.90502	1.36684	4.00297	1.16443	-2.09795	-14.2459	2.0873e-38	2.06092e-37
GPRC5B	9.24203	1.00406	10.6653	0.327552	-1.42331	-14.2455	2.09588e-38	2.06824e-37
TUFT1	10.0191	0.782573	8.83712	0.596627	1.18198	14.2409	2.19379e-38	2.16364e-37
MUSTN1	4.63283	1.32193	6.6995	1.24717	-2.06667	-14.2317	2.4032e-38	2.36885e-37
KANK2	10.2404	0.745048	11.4342	0.779549	-1.19378	-14.2266	2.52865e-38	2.48907e-37
C5orf20	5.13359	1.39586	2.9829	1.22473	2.15068	14.2259	2.54612e-38	2.50414e-37
KIAA1109	10.5869	0.810025	11.785	0.530521	-1.19806	-14.2187	2.73592e-38	2.6893e-37
IL17B	2.28669	1.78047	5.1297	1.86183	-2.84301	-14.2119	2.92501e-38	2.87038e-37
ALDH1A3	8.95455	1.27822	10.8854	1.00183	-1.93084	-14.2095	2.9951e-38	2.93753e-37
RFC4	8.77123	0.801787	7.61434	0.397888	1.15689	14.2083	3.03344e-38	2.97171e-37
APOBEC3H	3.91776	1.13489	2.21503	0.848454	1.70273	14.2066	3.08429e-38	3.0183e-37
WIF1	3.01733	2.79231	7.42408	2.78878	-4.40675	-14.2016	3.24066e-38	3.16606e-37
SHISA3	2.21966	1.3348	4.35368	1.40708	-2.13402	-14.1964	3.41116e-38	3.33078e-37
CHAF1A	8.96486	0.718543	7.89459	0.503687	1.07028	14.1954	3.4476e-38	3.36451e-37
TMEM149	7.73433	0.935395	6.33598	0.682438	1.39835	14.1935	3.51032e-38	3.42382e-37
STAT5A	10.13	0.809816	11.3658	0.675184	-1.23586	-14.1931	3.52426e-38	3.43552e-37
CD200	8.06079	0.79297	9.23193	0.521609	-1.17114	-14.1896	3.65031e-38	3.55643e-37
OR2B6	2.18683	1.426	0.186391	0.372216	2.00044	14.188	3.70799e-38	3.61064e-37
GAS1	8.86749	1.07858	10.4396	0.633589	-1.57213	-14.1834	3.88217e-38	3.77816e-37
GEN1	8.62314	0.704562	7.55009	0.580691	1.07305	14.1797	4.02591e-38	3.91589e-37
CXCR4	11.1083	0.970008	9.58489	0.948289	1.52345	14.1791	4.05132e-38	3.93665e-37
LMO2	8.08626	0.75506	9.20785	0.526544	-1.12158	-14.1701	4.43045e-38	4.29518e-37
IGF1	8.54326	1.57837	10.8733	1.06645	-2.33005	-14.1699	4.43853e-38	4.30065e-37
FRMPD4	0.734821	0.916534	2.21337	1.0079	-1.47854	-14.1596	4.91478e-38	4.75688e-37
PLA2G2D	6.93506	2.01372	3.85067	1.76008	3.08439	14.1583	4.97867e-38	4.81608e-37
LYPD1	5.8237	1.2411	3.92536	1.07342	1.89834	14.156	5.09281e-38	4.92379e-37
MEG3	5.69803	1.41786	7.76555	0.860743	-2.06752	-14.1549	5.14735e-38	4.9738e-37
TMEM79	8.94229	0.935405	7.52886	0.75024	1.41343	14.1507	5.36734e-38	5.17787e-37
DLK2	3.40098	1.55549	5.99917	1.94582	-2.59819	-14.1475	5.54232e-38	5.33792e-37
LOC400696	3.75833	2.02391	0.855848	1.01441	2.90248	14.1469	5.57168e-38	5.36327e-37
LRP1	12.6145	1.04401	14.2596	1.04864	-1.64504	-14.1437	5.75461e-38	5.53635e-37
RASSF7	8.91686	1.02747	7.1612	1.37671	1.75567	14.1407	5.92926e-38	5.70126e-37
PDE6G	4.46645	1.08083	2.77147	1.0657	1.69498	14.1362	6.19447e-38	5.95303e-37
SAMSN1	7.94749	0.876524	6.57438	0.85769	1.37311	14.1348	6.2858e-38	6.03751e-37
NAT8L	5.37817	1.72619	8.10344	1.7656	-2.72528	-14.1252	6.90967e-38	6.63313e-37
NR5A2	6.20373	1.00623	7.69508	0.726226	-1.49135	-14.0958	9.24085e-38	8.85176e-37
SH2D1A	6.82806	1.2845	4.90641	0.99719	1.92165	14.0931	9.49402e-38	9.08934e-37
MIR155HG	5.07102	1.17744	3.27887	1.01565	1.79216	14.0918	9.6191e-38	9.2041e-37
C8orf38	8.78796	0.855391	7.56145	0.440501	1.22651	14.0883	9.95461e-38	9.51482e-37
NUDT16L1	9.36659	0.746969	8.2692	0.498413	1.09739	14.0871	1.00716e-37	9.62144e-37
SLC25A19	8.1286	0.781147	7.00526	0.417754	1.12334	14.0832	1.04735e-37	9.99458e-37
EXOSC4	8.84402	0.966476	7.40943	0.712355	1.4346	14.0755	1.12936e-37	1.07713e-36
PNMAL2	5.58444	1.17973	7.26567	0.573018	-1.68123	-14.0748	1.13746e-37	1.08427e-36
CELF2	9.43068	0.926454	10.8724	0.89928	-1.44171	-14.0685	1.21128e-37	1.15401e-36
TRAT1	5.58232	1.3424	3.56238	1.09544	2.01994	14.0668	1.23146e-37	1.17261e-36
TCL1A	4.88416	2.20336	1.67029	1.44775	3.21388	14.0504	1.44774e-37	1.37781e-36
ZFYVE9	9.03613	0.703013	10.0373	0.335859	-1.00113	-14.0446	1.53262e-37	1.45702e-36
UNC13A	4.29027	1.33869	2.33724	0.881476	1.95303	14.041	1.58887e-37	1.50968e-36
ZNF502	6.23398	1.0688	7.73233	0.390761	-1.49835	-14.0377	1.64209e-37	1.55941e-36
ZCCHC24	9.45409	1.07773	11.0517	0.809173	-1.59765	-14.0264	1.83593e-37	1.74255e-36
PARP9	11.2761	0.721925	10.2337	0.423184	1.04243	14.0262	1.83973e-37	1.74523e-36
ATF3	9.43783	1.21518	11.4188	1.44119	-1.98098	-14.0258	1.84659e-37	1.75079e-36
ZMYND19	8.64026	0.692947	7.58677	0.603233	1.05349	14.0209	1.93836e-37	1.83681e-36
AK5	6.19178	2.20747	9.64822	2.25599	-3.45644	-14.0145	2.06352e-37	1.95332e-36
PCDHGA9	4.87956	1.41896	6.87475	0.59436	-1.9952	-14.0085	2.18937e-37	2.07133e-36
MET	8.92204	1.36009	10.8232	0.495207	-1.90113	-14.0078	2.20414e-37	2.08419e-36
RTKN	9.85356	0.714763	8.6956	0.828303	1.15797	14.005	2.26749e-37	2.14295e-36
S100A11	13.3041	0.827634	12.0867	0.588891	1.21741	14.0039	2.29223e-37	2.16401e-36
HOXC13	7.09603	1.7846	4.34595	1.70225	2.75008	14.002	2.33436e-37	2.20025e-36
TESC	4.98872	1.33659	7.01536	1.17139	-2.02664	-14.0018	2.34082e-37	2.20517e-36
CHEK1	7.84549	0.955218	6.48964	0.467729	1.35585	14.0014	2.34885e-37	2.21155e-36
GNG2	8.72895	0.822724	10.1711	1.21316	-1.44216	-13.9999	2.38477e-37	2.24417e-36
GINS4	7.73283	1.1866	6.02304	0.714023	1.70979	13.9936	2.53707e-37	2.38622e-36
ZC3H12C	7.17108	1.04449	8.67683	0.629284	-1.50575	-13.9934	2.54126e-37	2.38889e-36
RND3	9.70878	1.11732	11.293	0.548069	-1.58423	-13.9925	2.56356e-37	2.40857e-36
C15orf23	8.5396	0.819141	7.35588	0.501612	1.18373	13.9905	2.61609e-37	2.45662e-36
B4GALT6	5.90811	0.981095	7.33431	0.641261	-1.42621	-13.9902	2.62434e-37	2.46305e-36
GRK5	8.00448	0.712233	9.0807	0.607518	-1.07622	-13.9882	2.67529e-37	2.50954e-36
SDC1	12.5247	1.11865	10.3724	2.04744	2.1523	13.9864	2.72374e-37	2.55363e-36
ZC3H6	8.24524	0.68367	9.24664	0.470372	-1.00139	-13.9862	2.72972e-37	2.55788e-36
LEPREL1	6.886	1.36751	8.81405	0.621596	-1.92804	-13.9852	2.75519e-37	2.58038e-36
MITF	7.90785	0.84612	9.22231	0.836091	-1.31446	-13.9851	2.75876e-37	2.58236e-36
SCTR	0.430931	0.571741	1.65682	1.2747	-1.22589	-13.98	2.90042e-37	2.71351e-36
CMTM5	1.26595	1.62527	3.67538	1.25631	-2.40943	-13.9798	2.90655e-37	2.71781e-36
FLVCR1	7.75758	0.841396	6.49126	0.7092	1.26633	13.974	3.0775e-37	2.87613e-36
FBN2	6.68071	1.7595	4.05932	1.41376	2.62139	13.9678	3.27319e-37	3.05417e-36
RELL2	5.76897	1.14326	3.99428	1.13766	1.77468	13.9663	3.32073e-37	3.09689e-36
MMP28	5.94172	1.29293	7.94109	1.26681	-1.99937	-13.9644	3.38336e-37	3.15363e-36
TNFRSF4	6.2227	1.2463	4.37301	0.97524	1.84969	13.9636	3.4106e-37	3.17735e-36
TEPP	1.00599	1.04896	2.74565	1.3343	-1.73966	-13.9634	3.41687e-37	3.18151e-36
CACNB3	9.38022	0.781722	8.19067	0.702279	1.18954	13.9626	3.44293e-37	3.20408e-36
CXCR7	8.68745	1.02817	10.4873	1.5253	-1.79984	-13.9571	3.63489e-37	3.37916e-36
FAM49A	6.5662	0.899359	7.85644	0.526275	-1.29024	-13.9551	3.7085e-37	3.44397e-36
PTN	7.67097	1.78572	10.6225	2.25743	-2.95153	-13.9551	3.70843e-37	3.44397e-36
MYH7B	2.74683	1.1587	4.49709	1.01394	-1.75026	-13.9484	3.96191e-37	3.67737e-36
BRI3BP	6.77816	0.752695	5.65148	0.619073	1.12668	13.947	4.01672e-37	3.72628e-36
C1orf115	9.45016	1.19516	11.1299	0.541311	-1.67971	-13.9394	4.32853e-37	4.01133e-36
CD72	6.75623	1.13145	5.1026	0.801825	1.65363	13.9378	4.39806e-37	4.07363e-36
CORO1A	10.4748	1.19345	8.71655	0.902388	1.7583	13.93	4.74923e-37	4.39428e-36
ARFGAP1	10.6412	0.690437	9.61235	0.555922	1.02883	13.9238	5.04753e-37	4.66052e-36
MRVI1	8.2432	0.972664	9.616	0.478888	-1.37281	-13.9183	5.32937e-37	4.91561e-36
CD27	7.9576	1.33552	5.93369	1.20968	2.02391	13.9079	5.90322e-37	5.44206e-36
TPPP	6.70603	1.5789	8.91668	0.705554	-2.21065	-13.905	6.0709e-37	5.59372e-36
CPE	10.3343	1.20003	12.0089	0.502515	-1.67456	-13.8972	6.56036e-37	6.03841e-36
C5orf41	8.26643	0.959508	9.66135	0.664462	-1.39492	-13.8965	6.60478e-37	6.07295e-36
IGFBP1	0.965921	1.21154	3.29568	2.24457	-2.32976	-13.8965	6.60244e-37	6.07295e-36
LPAR6	9.29541	0.734462	10.3542	0.467166	-1.05878	-13.8939	6.77138e-37	6.21966e-36
RIMS3	6.80539	1.14186	8.50052	0.926505	-1.69513	-13.8858	7.33851e-37	6.73358e-36
PMCH	1.96715	1.06153	0.456337	0.606945	1.51081	13.8816	7.64594e-37	7.00474e-36
EVPL	9.74738	0.993492	7.82783	1.86174	1.91955	13.8783	7.89957e-37	7.23335e-36
HNMT	9.534	0.741174	10.6333	0.594431	-1.09932	-13.8744	8.20747e-37	7.51139e-36
ZBTB32	3.72051	1.18622	1.99985	0.821939	1.72066	13.8737	8.26504e-37	7.55624e-36
POP7	9.10924	0.704997	8.10713	0.390989	1.0021	13.8708	8.4988e-37	7.76594e-36
NR1D2	9.93438	0.724542	11.0291	0.647592	-1.0947	-13.8707	8.50654e-37	7.76898e-36
APOLD1	9.15058	1.06802	10.9267	1.39869	-1.77608	-13.8698	8.58602e-37	7.83752e-36
CCL17	4.37765	1.58387	2.07619	1.1224	2.30147	13.8666	8.85922e-37	8.07855e-36
CCL28	6.58525	1.88638	9.52827	1.9851	-2.94303	-13.8654	8.96755e-37	8.17311e-36
ESRP1	11.6007	0.761906	9.34337	2.74236	2.25733	13.8594	9.50708e-37	8.66037e-36
MAP1B	9.9168	1.07685	11.4538	0.647206	-1.53699	-13.8591	9.54079e-37	8.6866e-36
SBF2	9.49454	0.793054	10.6439	0.544957	-1.14934	-13.8538	1.00452e-36	9.14118e-36
HSD17B11	8.76788	0.775268	9.94069	0.703509	-1.17281	-13.8536	1.00646e-36	9.15403e-36
PIWIL2	2.36114	1.50509	4.63322	1.36823	-2.27208	-13.8472	1.07231e-36	9.74798e-36
NPAS3	5.18002	1.1808	6.86542	0.718383	-1.6854	-13.8469	1.07486e-36	9.76612e-36
THRSP	6.21961	2.61646	9.99281	1.77329	-3.7732	-13.8435	1.11142e-36	1.00827e-35
MMP3	7.68366	1.86006	4.82283	1.85567	2.86083	13.8403	1.14678e-36	1.03982e-35
FAM150B	2.24614	1.99779	5.19793	1.61554	-2.95179	-13.8398	1.15253e-36	1.04449e-35
PRDM16	4.17727	1.28371	6.01574	0.816079	-1.83847	-13.8349	1.21009e-36	1.09609e-35
DFNB59	4.23027	0.880418	5.46272	0.42039	-1.23245	-13.8253	1.3287e-36	1.20292e-35
PPP2R1B	9.48013	0.581815	10.5802	1.04742	-1.10004	-13.8248	1.33563e-36	1.20857e-35
DPY19L2	4.46421	1.35884	6.39429	0.802171	-1.93008	-13.8231	1.35767e-36	1.22788e-35
ERMN	4.63247	1.3777	2.64369	0.955221	1.98877	13.8102	1.54129e-36	1.39253e-35
STRA13	9.26881	0.921489	7.94355	0.616079	1.32526	13.8023	1.66621e-36	1.50462e-35
GPM6B	7.49428	1.33454	9.47768	1.13678	-1.98339	-13.7937	1.81218e-36	1.63142e-35
BNIP3L	11.0735	0.647083	12.0737	0.660589	-1.00021	-13.7919	1.84543e-36	1.65966e-35
FKBP4	12.7148	0.821466	11.4802	0.739059	1.23466	13.7908	1.86502e-36	1.67643e-35
FOXD4L1	2.88471	1.02294	1.44079	0.577251	1.44392	13.7812	2.04888e-36	1.83609e-35
EGR2	8.58365	1.17409	10.4635	1.3922	-1.87989	-13.7756	2.16416e-36	1.93841e-35
NCRNA00182	4.99485	0.764405	6.09583	0.525123	-1.10098	-13.7659	2.38081e-36	2.13138e-35
DEF6	8.99879	0.801877	7.70762	0.967797	1.29117	13.7656	2.38784e-36	2.13659e-35
ASPHD2	6.58232	0.778579	5.48319	0.441194	1.09913	13.7605	2.50914e-36	2.24399e-35
THOC6	9.03114	0.688419	8.00787	0.586469	1.02327	13.7599	2.52336e-36	2.25556e-35
TMEM55A	7.22428	0.81437	8.41538	0.63165	-1.19109	-13.7587	2.55473e-36	2.28245e-35
LOC100190939	6.84294	0.825267	8.04362	0.618191	-1.20068	-13.7559	2.62448e-36	2.34358e-35
FAM7A3	2.26655	0.865357	3.65424	1.03373	-1.3877	-13.7552	2.64386e-36	2.35969e-35
RPL21P44	1.27047	0.719459	2.36696	0.701439	-1.09649	-13.7485	2.82321e-36	2.51849e-35
CCRL1	5.57718	1.11464	7.33408	1.25917	-1.75689	-13.7446	2.9341e-36	2.61477e-35
DNAH9	2.67382	1.66927	5.06763	1.14367	-2.39381	-13.7432	2.97178e-36	2.64568e-35
APCDD1L	5.094	1.73924	7.74896	1.73133	-2.65496	-13.7424	2.99522e-36	2.6652e-35
CXCL3	2.44807	1.52261	4.63866	1.07237	-2.19058	-13.7394	3.08522e-36	2.74252e-35
JUN	11.7911	1.01195	13.2898	0.861153	-1.49865	-13.7378	3.13506e-36	2.78542e-35
MYOM2	3.93736	1.3718	6.17579	1.74865	-2.23844	-13.7364	3.17888e-36	2.82294e-35
CENPN	8.45287	0.94334	7.15168	0.399157	1.30119	13.7187	3.77789e-36	3.34982e-35
KIAA1239	1.69498	1.56344	4.33212	2.20461	-2.63714	-13.7183	3.79563e-36	3.36385e-35
CBX8	7.22372	0.867465	5.89078	0.889671	1.33293	13.718	3.80686e-36	3.37212e-35
C2orf58	2.64064	0.986954	4.04314	0.631369	-1.4025	-13.7081	4.19297e-36	3.70669e-35
LUZP2	3.24464	2.015	6.16098	1.5175	-2.91634	-13.7029	4.41006e-36	3.89276e-35
SRL	3.94215	1.13326	5.71332	1.2546	-1.77117	-13.7027	4.42145e-36	3.90086e-35
ACTG2	8.22899	2.40951	11.6851	1.69947	-3.45609	-13.7016	4.46572e-36	3.93795e-35
P2RY10	6.0944	1.31675	4.17025	1.05499	1.92415	13.7003	4.5262e-36	3.98929e-35
CD48	8.97978	1.07442	7.41754	0.8305	1.56224	13.7001	4.53262e-36	3.99296e-35
DENND2C	4.8438	1.10474	6.39699	0.64024	-1.55319	-13.6983	4.61499e-36	4.0635e-35
UST	7.18305	1.03303	8.63442	0.593401	-1.45138	-13.6966	4.68962e-36	4.12715e-35
HIST1H4H	7.54096	1.69047	5.10669	1.22976	2.43427	13.6962	4.71129e-36	4.14415e-35
CLDN14	3.29181	1.29601	1.39682	1.04661	1.89499	13.6909	4.95794e-36	4.35677e-35
PYROXD2	6.74649	1.17865	8.40852	0.711392	-1.66203	-13.6902	4.99205e-36	4.38456e-35
GRRP1	5.12557	1.27419	6.962	0.933416	-1.83643	-13.689	5.05496e-36	4.43761e-35
MXRA7	10.5963	0.826537	11.8145	0.696965	-1.21823	-13.6829	5.36626e-36	4.70621e-35
MC1R	6.74079	0.939079	5.36001	0.784644	1.38078	13.6786	5.59221e-36	4.90193e-35
UBE2L6	11.3877	0.856111	10.195	0.447748	1.19266	13.6727	5.92598e-36	5.19192e-35
RHEBL1	4.76381	1.00223	3.3469	0.628872	1.4169	13.666	6.32667e-36	5.53582e-35
STX1A	6.82703	0.873804	5.55687	0.684054	1.27016	13.6598	6.72194e-36	5.8718e-35
EPS8	9.92686	0.878007	11.1614	0.52073	-1.23458	-13.6595	6.73924e-36	5.884e-35
RAC2	10.0786	0.9959	8.65011	0.711955	1.42853	13.6585	6.8063e-36	5.93668e-35
MYCBP2	10.7116	0.789969	11.8731	0.664914	-1.16152	-13.6509	7.33259e-36	6.38942e-35
CRHR2	0.658813	0.641691	1.75802	0.94901	-1.09921	-13.6495	7.43457e-36	6.47509e-35
PDE8B	5.61534	1.78116	8.17027	1.29197	-2.55493	-13.6492	7.45191e-36	6.48699e-35
RNF157	6.44101	1.2189	8.3531	1.39063	-1.91209	-13.6451	7.75778e-36	6.74992e-35
EDN3	3.14543	2.47825	6.94385	2.59364	-3.79841	-13.6421	7.99212e-36	6.95039e-35
SEC1	2.16442	0.852008	3.43223	0.770822	-1.26781	-13.6412	8.06162e-36	7.00738e-35
BMP6	6.32197	1.21237	8.09185	0.99414	-1.76988	-13.6337	8.673e-36	7.53139e-35
SULT1C4	4.34377	1.39483	6.27008	0.687444	-1.92631	-13.632	8.82266e-36	7.65758e-35
LDB3	4.41985	1.07377	6.21733	1.50723	-1.79748	-13.6292	9.06336e-36	7.85877e-35
CAPG	11.7957	0.858559	10.5022	0.830429	1.29358	13.6274	9.22685e-36	7.99661e-35
CLCN2	7.05503	0.861267	5.80093	0.695209	1.2541	13.6178	1.01258e-35	8.7671e-35
GPR18	4.8413	1.30322	2.96598	0.981847	1.87532	13.6152	1.03903e-35	8.9829e-35
ST6GALNAC6	9.88679	0.636531	10.9147	0.801057	-1.02788	-13.613	1.06162e-35	9.17371e-35
FRY	8.91825	1.08026	10.3912	0.429699	-1.47297	-13.6074	1.1206e-35	9.66913e-35
LOC401052	6.05652	0.851647	7.47499	1.18318	-1.41847	-13.6021	1.18046e-35	1.01807e-34
REV3L	9.25073	0.811314	10.4071	0.566354	-1.15638	-13.6006	1.1977e-35	1.03243e-34
GPR34	7.11144	1.07373	8.74184	1.08933	-1.6304	-13.5998	1.20694e-35	1.03989e-34
LAMA2	9.01241	1.48257	11.1052	0.971982	-2.09279	-13.5948	1.26827e-35	1.0906e-34
PAR5	3.49914	1.65469	5.89257	1.31141	-2.39343	-13.589	1.34137e-35	1.15178e-34
AADAC	1.59143	1.67144	4.63136	2.89492	-3.03993	-13.5819	1.43786e-35	1.23403e-34
CD3E	9.11441	1.20074	7.3742	0.96362	1.74021	13.5815	1.44348e-35	1.23825e-34
ZDBF2	6.66073	1.31292	8.46405	0.628652	-1.80332	-13.5812	1.44712e-35	1.24077e-34
HSPA12A	7.5662	1.09127	9.32283	1.38228	-1.75663	-13.5724	1.57636e-35	1.35027e-34
FAM195A	8.4348	1.01174	6.99831	0.706655	1.43649	13.5602	1.77536e-35	1.51779e-34
SPIB	5.93148	2.08624	2.97443	1.45564	2.95705	13.5567	1.83725e-35	1.56993e-34
CST2	3.97239	2.27746	0.852636	1.09147	3.11976	13.554	1.88699e-35	1.61166e-34
MAFF	8.48577	1.00584	9.97407	0.917416	-1.4883	-13.5518	1.92716e-35	1.64517e-34
ZFP36L2	12.0835	0.790746	13.1911	0.486838	-1.10766	-13.5517	1.92958e-35	1.64644e-34
SESN1	9.07629	0.773426	10.1566	0.461729	-1.08032	-13.5514	1.93415e-35	1.64954e-34
RUFY4	4.20676	1.72664	1.78356	1.10875	2.4232	13.5495	1.97171e-35	1.68076e-34
PDRG1	9.28098	0.736375	8.24382	0.477031	1.03717	13.5487	1.98604e-35	1.69216e-34
OLFML1	7.8751	0.912904	9.23977	0.876119	-1.36466	-13.5462	2.03542e-35	1.7334e-34
PTPRCAP	8.27106	1.49964	6.15434	1.01426	2.11672	13.5457	2.04492e-35	1.74065e-34
BVES	5.82442	1.13055	7.41008	0.718312	-1.58565	-13.5454	2.05144e-35	1.74536e-34
IL17RD	8.93722	1.25636	10.7264	0.916665	-1.78921	-13.5332	2.31037e-35	1.96281e-34
ARHGAP11B	4.6702	1.25052	2.87308	0.974609	1.79712	13.5293	2.39917e-35	2.03629e-34
FAT2	6.87203	2.1631	9.91638	1.44919	-3.04436	-13.527	2.45396e-35	2.0818e-34
CCL5	10.3967	1.21823	8.64294	0.961304	1.75378	13.5267	2.46044e-35	2.08629e-34
EBP	9.62075	0.795146	8.50744	0.49698	1.11331	13.5255	2.48994e-35	2.1103e-34
OR2L13	1.04453	1.06204	2.8008	1.47278	-1.75627	-13.5225	2.56258e-35	2.16977e-34
C9orf172	3.91386	1.19138	2.25282	0.729426	1.66104	13.5175	2.68999e-35	2.27438e-34
TMC6	9.92739	0.79703	8.76502	0.678016	1.16236	13.5157	2.73793e-35	2.3127e-34
C18orf56	4.05606	1.31171	2.21732	0.851085	1.83875	13.5127	2.82004e-35	2.37978e-34
SHANK3	8.89055	0.826315	10.1124	0.759852	-1.22185	-13.5108	2.87202e-35	2.42248e-34
PER3	9.07643	0.942509	10.4338	0.751106	-1.35736	-13.5008	3.16563e-35	2.66887e-34
FAIM3	8.79393	1.09029	7.23795	0.821254	1.55598	13.4975	3.26858e-35	2.75435e-34
CALN1	1.93199	1.49837	4.03798	1.00923	-2.10598	-13.4949	3.35262e-35	2.82247e-34
LEPROT	8.99572	0.939234	10.2814	0.465065	-1.2857	-13.4921	3.4458e-35	2.89815e-34
ARRDC4	8.84246	0.900792	10.0906	0.52347	-1.24811	-13.4864	3.6398e-35	3.05841e-34
HRASLS5	6.20027	2.36595	9.4763	1.39976	-3.27604	-13.4817	3.81241e-35	3.19887e-34
C20orf151	6.96565	1.0637	4.93438	2.06374	2.03127	13.4762	4.02212e-35	3.37003e-34
C17orf51	7.06961	0.88387	8.28439	0.470115	-1.21478	-13.4741	4.10257e-35	3.43417e-34
FAM7A2	1.05502	0.807293	2.34417	1.01892	-1.28915	-13.4667	4.40864e-35	3.68863e-34
PAK4	10.7188	0.780458	9.50207	0.909196	1.21674	13.4634	4.55496e-35	3.80745e-34
TMEM92	3.7501	1.40833	1.75224	1.04159	1.99786	13.459	4.75358e-35	3.97159e-34
MEIS1	7.13515	0.910163	8.37883	0.457283	-1.24369	-13.4531	5.03399e-35	4.20189e-34
KIF13A	9.81726	0.862872	10.9977	0.450123	-1.18043	-13.4295	6.32606e-35	5.2779e-34
STON1	7.98325	0.948574	9.36816	0.846751	-1.38491	-13.4241	6.66581e-35	5.55872e-34
CD19	5.01715	2.2769	1.87521	1.36102	3.14194	13.4223	6.78702e-35	5.6518e-34
DPYD	8.86447	0.89674	10.0763	0.389009	-1.21184	-13.4206	6.89542e-35	5.73935e-34
DLEU2	5.59344	0.875154	4.36294	0.611353	1.2305	13.4205	6.90314e-35	5.74307e-34
IRX6	3.94709	1.96135	6.74747	1.55657	-2.80038	-13.4132	7.41155e-35	6.15734e-34
CST7	7.46618	1.16187	5.84269	0.780864	1.62348	13.4124	7.46762e-35	6.19817e-34
SLC38A5	7.06625	1.16884	5.38013	0.983796	1.68611	13.4124	7.46772e-35	6.19817e-34
PAR-SN	5.67858	1.21322	7.32177	0.570507	-1.64319	-13.4045	8.05802e-35	6.68184e-34
PDZRN3	8.84336	1.08539	10.3159	0.526915	-1.47257	-13.3966	8.7014e-35	7.20519e-34
ACADS	8.00524	1.02184	9.49867	0.928635	-1.49343	-13.3956	8.78568e-35	7.27156e-34
VGLL3	8.00621	1.24095	9.79776	1.06711	-1.79155	-13.375	1.07238e-34	8.83425e-34
LPHN2	9.24931	1.09763	10.7262	0.474961	-1.4769	-13.3749	1.07432e-34	8.8461e-34
ARRDC1	10.0259	0.791458	8.8853	0.667954	1.14058	13.3736	1.08794e-34	8.9499e-34
GOLGA6L10	6.25632	0.836592	7.41504	0.528334	-1.15872	-13.3692	1.13495e-34	9.32361e-34
GCNT4	4.51019	1.36258	6.38661	0.828809	-1.87642	-13.3642	1.19129e-34	9.78184e-34
LOC148709	3.55954	1.28712	1.76156	0.894662	1.79798	13.3581	1.26397e-34	1.0369e-33
AFAP1L2	8.50125	0.935075	9.7941	0.588974	-1.29285	-13.3563	1.28572e-34	1.05426e-33
TIPARP	9.57898	0.842728	10.8257	0.821928	-1.24677	-13.3561	1.28841e-34	1.05597e-33
FLT4	7.87895	0.924034	9.15935	0.595206	-1.28039	-13.3535	1.3215e-34	1.08258e-33
SIGLEC7	5.64093	0.985742	4.14223	1.08552	1.4987	13.3433	1.4581e-34	1.19283e-33
LYZ	12.3417	1.46018	10.197	1.39311	2.14462	13.3414	1.4849e-34	1.2142e-33
FAM69A	8.04444	0.711579	9.10359	0.714976	-1.05915	-13.3376	1.54007e-34	1.25814e-33
TPTE2P1	2.43509	1.11113	3.96486	0.685982	-1.52977	-13.3349	1.58199e-34	1.29119e-33
GZMA	7.61969	1.26474	5.84973	0.904783	1.76997	13.3336	1.60116e-34	1.30623e-33
HS3ST3A1	4.93651	1.08722	3.43126	0.708625	1.50526	13.333	1.61045e-34	1.3132e-33
UNC119B	9.47382	0.766772	10.518	0.411039	-1.04423	-13.3328	1.61351e-34	1.3151e-33
TUBG2	7.73349	0.778022	8.79262	0.41779	-1.05913	-13.327	1.70726e-34	1.39086e-33
BCL3	10.149	0.735417	9.03181	0.80737	1.11717	13.3264	1.71642e-34	1.39703e-33
ENTPD7	8.88234	0.73908	7.81803	0.63355	1.06431	13.3226	1.78162e-34	1.44743e-33
LOC100126784	3.85288	1.39437	5.86128	1.21244	-2.00839	-13.3207	1.81484e-34	1.47375e-33
OSR1	6.03441	2.16461	8.9281	0.914392	-2.89369	-13.32	1.82677e-34	1.48275e-33
CAMK1	7.6604	0.650146	8.75639	0.982935	-1.09599	-13.318	1.86189e-34	1.51056e-33
LRRC45	8.70112	1.02637	7.22563	0.881838	1.47549	13.3137	1.94121e-34	1.57419e-33
SV2B	5.43285	1.37439	7.34856	0.970441	-1.91571	-13.3046	2.11876e-34	1.71738e-33
SLCO1C1	2.02229	0.970999	3.59729	1.33493	-1.57499	-13.3017	2.18026e-34	1.76642e-33
CCDC137	8.98836	0.784697	7.86765	0.649296	1.12071	13.2973	2.27527e-34	1.84171e-33
TMEM170B	7.40578	0.892608	8.78668	1.0596	-1.3809	-13.2957	2.30895e-34	1.86811e-33
FMOD	10.6961	1.31719	12.504	0.815593	-1.80788	-13.2955	2.31344e-34	1.87089e-33
SH3RF2	5.96251	1.71139	8.23439	0.644533	-2.27188	-13.2914	2.40879e-34	1.94711e-33
COL4A6	5.08838	2.13799	8.04357	1.42775	-2.95519	-13.2899	2.44387e-34	1.97456e-33
SLAMF6	7.60633	1.2795	5.81772	0.931185	1.7886	13.2889	2.46554e-34	1.99116e-33
NLGN4X	5.91681	1.63986	8.11261	0.748399	-2.1958	-13.2833	2.60437e-34	2.10231e-33
RBPMS	9.83531	0.912443	11.0703	0.481347	-1.235	-13.2795	2.70048e-34	2.1779e-33
NOV	6.9555	1.2718	8.74064	0.960547	-1.78514	-13.2754	2.81112e-34	2.26506e-33
KIAA1683	6.15458	1.37143	8.0517	0.929574	-1.89712	-13.2699	2.96295e-34	2.38522e-33
CADM3	5.97769	1.76698	8.42082	1.19751	-2.44313	-13.2688	2.99349e-34	2.40871e-33
SOLH	9.51481	0.724254	8.49585	0.549363	1.01896	13.2687	2.99661e-34	2.41012e-33
PIK3C2G	4.71659	2.24785	8.14643	2.57758	-3.42984	-13.2629	3.17052e-34	2.54883e-33
ZNF662	6.63105	1.36957	8.45421	0.575978	-1.82316	-13.2587	3.30091e-34	2.65003e-33
PCDH19	5.78589	1.70827	8.06592	0.764351	-2.28003	-13.2559	3.39287e-34	2.72262e-33
SGCE	8.90002	1.12572	10.3792	0.323668	-1.47919	-13.2543	3.44372e-34	2.76217e-33
TBC1D10C	7.42462	1.35865	5.51869	1.03664	1.90593	13.2501	3.58833e-34	2.87686e-33
MEF2C	9.177	0.794105	10.3024	0.640777	-1.12536	-13.2488	3.63051e-34	2.90935e-33
OR2A1	2.11688	0.763255	3.24564	0.769674	-1.12876	-13.2463	3.72172e-34	2.97839e-33
TIGD5	7.61954	0.922081	6.30644	0.771682	1.3131	13.2435	3.82421e-34	3.05902e-33
FZD5	7.09895	0.867795	8.31596	0.657135	-1.21701	-13.2427	3.85255e-34	3.08029e-33
AKAP2	9.20602	1.15206	10.7757	0.691007	-1.56971	-13.2352	4.14004e-34	3.30716e-33
ESR2	3.43196	0.85999	4.86756	1.29272	-1.43561	-13.2346	4.16409e-34	3.32487e-33
SIRPA	10.323	0.804601	11.4042	0.399536	-1.08126	-13.2326	4.24718e-34	3.38968e-33
NRG1	4.32945	1.70768	7.02755	2.2139	-2.6981	-13.2313	4.30156e-34	3.43153e-33
LRRC61	8.34161	0.767725	7.25444	0.621955	1.08717	13.2281	4.43252e-34	3.5344e-33
DES	4.28272	2.25589	7.66242	2.4462	-3.3797	-13.2172	4.92661e-34	3.92483e-33
FAM158A	7.36249	0.823018	6.22079	0.582261	1.14169	13.2158	4.99192e-34	3.97508e-33
EOMES	5.82272	1.42724	3.82884	1.07945	1.99388	13.2132	5.12118e-34	4.07471e-33
NAP1L5	6.5914	0.903979	7.78546	0.333515	-1.19406	-13.2131	5.12167e-34	4.07471e-33
LOC100128164	1.30639	0.819046	2.67081	1.23141	-1.36442	-13.204	5.59496e-34	4.44925e-33
NRIP2	6.14759	0.883759	7.35257	0.543311	-1.20498	-13.2003	5.79389e-34	4.60538e-33
LOC100132707	6.07471	0.765447	7.10893	0.422871	-1.03422	-13.1964	6.01576e-34	4.77743e-33
CDR1	3.06487	1.52767	5.52397	2.10738	-2.4591	-13.1955	6.07087e-34	4.81903e-33
C5orf62	8.65195	0.763369	9.87836	1.04383	-1.22641	-13.1887	6.47782e-34	5.13513e-33
PCDHGA11	4.08497	1.15879	5.65226	0.669058	-1.5673	-13.1841	6.77217e-34	5.36606e-33
PDGFA	8.08116	0.779143	9.31507	1.02322	-1.23391	-13.1826	6.86986e-34	5.43859e-33
LOC643763	1.79806	1.48356	3.87641	1.16252	-2.07835	-13.182	6.9103e-34	5.46815e-33
ANKRD58	4.45229	1.1241	2.85357	0.965089	1.59872	13.1768	7.2689e-34	5.74419e-33
ZFP2	5.27157	0.945738	6.51961	0.367815	-1.24804	-13.1756	7.35175e-34	5.80706e-33
TMEM54	9.85745	0.803021	8.73377	0.619165	1.12368	13.174	7.465e-34	5.89388e-33
SLCO1A2	1.81495	1.92348	4.81555	2.43114	-3.0006	-13.1725	7.57164e-34	5.9754e-33
RASIP1	7.70838	1.05417	9.11772	0.528164	-1.40934	-13.1724	7.57854e-34	5.97817e-33
HIST1H2BH	3.68605	1.62044	1.50282	0.92184	2.18324	13.159	8.62014e-34	6.79071e-33
C2orf71	1.04845	1.2545	2.77835	0.886817	-1.72991	-13.158	8.70984e-34	6.85832e-33
ABHD11	9.91112	0.919781	8.62526	0.714294	1.28586	13.156	8.87741e-34	6.98093e-33
CD37	9.21081	1.11201	7.66549	0.832718	1.54531	13.1547	8.98652e-34	7.05896e-33
SAA4	2.96496	1.8457	5.49669	1.25848	-2.53172	-13.1547	8.98864e-34	7.05896e-33
EPN3	9.15351	1.2774	6.9221	2.17354	2.23141	13.1484	9.54835e-34	7.48519e-33
PHKG1	3.43182	1.55041	5.59067	1.18841	-2.15885	-13.1461	9.76467e-34	7.65137e-33
FAM184A	5.77319	1.28324	7.47272	0.57531	-1.69953	-13.1456	9.81269e-34	7.68559e-33
PPP1R15A	10.0697	0.77012	11.214	0.818982	-1.14433	-13.1435	1.00047e-33	7.82907e-33
KLHL30	2.90246	1.42433	5.10435	1.76011	-2.20189	-13.1419	1.01634e-33	7.94968e-33
GFRA2	4.01642	1.49201	6.12886	1.27333	-2.11243	-13.1387	1.04838e-33	8.19667e-33
FOXD4L6	1.94084	1.00502	0.59418	0.537152	1.34666	13.1386	1.0489e-33	8.19711e-33
CTF1	6.20077	1.22929	7.80501	0.385288	-1.60424	-13.1381	1.05419e-33	8.23481e-33
GPR182	1.29259	0.898891	2.7169	1.19652	-1.42432	-13.1372	1.06326e-33	8.29834e-33
NAV3	6.15826	1.64	8.30597	0.587375	-2.14771	-13.136	1.07567e-33	8.39149e-33
MSRA	6.94927	0.812865	8.02821	0.374099	-1.07893	-13.1325	1.11289e-33	8.6703e-33
PPAPDC3	5.15564	0.969868	6.58608	1.00794	-1.43044	-13.1314	1.12422e-33	8.75084e-33
SOCS2	7.91937	1.36017	9.72676	0.658406	-1.80739	-13.1309	1.1294e-33	8.78733e-33
ZNF658	5.47574	0.858009	6.61774	0.418425	-1.142	-13.1261	1.1826e-33	9.1972e-33
TWIST2	4.66298	1.19015	6.44058	1.30696	-1.7776	-13.1241	1.20619e-33	9.37655e-33
WDHD1	8.14082	0.831988	7.01651	0.49396	1.12431	13.1228	1.22162e-33	9.49231e-33
NTF4	2.72819	1.60226	5.23494	2.06749	-2.50675	-13.121	1.24255e-33	9.64219e-33
VIM	14.3816	0.770468	15.5433	0.874515	-1.16172	-13.1144	1.32318e-33	1.02589e-32
ISG20	8.73815	1.10526	7.18503	0.91015	1.55312	13.1112	1.36502e-33	1.05739e-32
ZC3H12D	4.30749	1.21146	2.63335	0.895405	1.67415	13.1081	1.40616e-33	1.08879e-32
KIAA0427	9.57385	0.714531	10.6447	0.793495	-1.07088	-13.1062	1.43152e-33	1.10794e-32
ANKRD35	5.45646	1.51721	7.44319	0.575719	-1.98673	-13.1044	1.45645e-33	1.12575e-32
ITIH2	1.67859	1.89669	4.78111	2.78793	-3.10252	-13.0996	1.52563e-33	1.17871e-32
ARTN	5.18405	1.72918	2.8478	1.06649	2.33625	13.0985	1.54186e-33	1.1902e-32
KCNIP4	3.91743	0.751876	4.96452	0.582081	-1.04709	-13.0984	1.5431e-33	1.19064e-32
LGALS9	10.6406	0.915998	9.3538	0.75573	1.28681	13.0952	1.59122e-33	1.22723e-32
CHST3	8.8611	1.16703	10.3928	0.469922	-1.53166	-13.0936	1.61574e-33	1.2456e-32
LOH3CR2A	4.96852	1.03424	6.44602	0.940518	-1.47749	-13.0926	1.6312e-33	1.25697e-32
GRIN2D	5.71816	1.27601	4.01011	0.710458	1.70805	13.0919	1.64268e-33	1.26527e-32
C6orf174	5.27501	1.17254	6.85559	0.705976	-1.58057	-13.09	1.67356e-33	1.28849e-32
NAPSB	8.14796	1.18581	6.38296	1.29914	1.76499	13.0866	1.72921e-33	1.33017e-32
CDKN2BAS	3.36924	1.31194	1.60983	0.75325	1.75941	13.0828	1.79271e-33	1.37842e-32
BRIP1	6.86979	1.39314	4.94941	1.02933	1.92038	13.0795	1.84934e-33	1.42134e-32
CADM2	2.82872	1.80243	5.31303	1.33442	-2.48432	-13.0794	1.85196e-33	1.42274e-32
PDE3B	7.23737	1.25049	9.49733	2.31028	-2.25996	-13.079	1.85925e-33	1.42771e-32
ITPR1	9.88522	1.2498	11.5894	0.847714	-1.70419	-13.077	1.89581e-33	1.45516e-32
PKP3	10.2272	0.853498	8.5915	1.76155	1.63568	13.0766	1.9027e-33	1.45981e-32
ADAMTS18	4.20896	1.86898	6.77248	1.33929	-2.56352	-13.0731	1.96676e-33	1.5083e-32
PGAP1	7.79901	0.954904	9.08574	0.577928	-1.28673	-13.0699	2.02848e-33	1.55429e-32
RGS10	9.80325	0.761663	8.75193	0.563017	1.05132	13.0688	2.05098e-33	1.57085e-32
C10orf54	9.45032	0.894744	10.6721	0.613606	-1.22179	-13.0644	2.13933e-33	1.63709e-32
PVRL2	11.9463	0.791237	10.8271	0.687738	1.11918	13.0588	2.25579e-33	1.72547e-32
STXBP6	3.32386	1.677	5.55946	0.926208	-2.2356	-13.0531	2.38332e-33	1.81986e-32
PCDHB15	4.67887	0.995506	6.00769	0.552409	-1.32883	-13.0492	2.47359e-33	1.88634e-32
ADM	7.1047	1.34513	9.00369	1.17361	-1.899	-13.0473	2.51915e-33	1.92025e-32
PRKCA	7.36172	1.07052	8.77961	0.539882	-1.41789	-13.0448	2.58074e-33	1.9655e-32
RIC3	5.05807	1.83509	7.49579	0.982494	-2.43772	-13.0405	2.68908e-33	2.04713e-32
C19orf48	9.97253	0.811771	8.78625	0.83379	1.18628	13.038	2.75406e-33	2.0957e-32
AMY2B	6.72609	1.2355	8.35043	0.561986	-1.62433	-13.0377	2.76193e-33	2.10078e-32
MCC	9.02721	1.00345	10.3303	0.338563	-1.30306	-13.0362	2.80138e-33	2.12987e-32
WBSCR28	2.06605	1.41076	0.243105	0.417074	1.82295	13.0329	2.89177e-33	2.19765e-32
TP53AIP1	2.98344	1.50578	5.35074	2.01171	-2.36731	-13.0321	2.91292e-33	2.21277e-32
SC65	9.16376	0.863153	7.95792	0.708277	1.20584	13.0309	2.948e-33	2.23845e-32
LCN6	1.02357	1.1536	2.72845	1.24981	-1.70488	-13.0302	2.9662e-33	2.2513e-32
OAS2	11.2405	1.26722	9.5312	0.810205	1.70934	13.0223	3.19968e-33	2.42538e-32
CENPP	6.89842	0.848329	5.74214	0.587442	1.15627	13.0218	3.21548e-33	2.43631e-32
C20orf132	4.18106	0.99036	5.5413	0.731666	-1.36024	-13.0212	3.23555e-33	2.45047e-32
EDA2R	5.71693	1.16463	7.29201	0.763343	-1.57508	-13.0187	3.31268e-33	2.50781e-32
CARD6	7.63655	0.812341	8.75663	0.617651	-1.12008	-13.0083	3.66031e-33	2.76386e-32
CACNA2D1	5.0755	2.05766	7.86894	1.41886	-2.79344	-13.0032	3.84343e-33	2.89965e-32
ZDHHC2	7.83513	1.07819	9.24935	0.490544	-1.41422	-13.0021	3.88163e-33	2.92722e-32
CXCR2	3.23351	1.05793	4.79599	1.15323	-1.56249	-12.9987	4.00974e-33	3.02125e-32
HSD17B7	8.33468	0.714723	7.33221	0.607629	1.00247	12.992	4.27527e-33	3.21446e-32
RAMP1	7.19592	1.72545	4.7929	1.42961	2.40302	12.9918	4.28352e-33	3.2193e-32
BHLHE41	9.67471	1.02525	11.0453	0.610208	-1.37057	-12.9903	4.34657e-33	3.26529e-32
KCNJ8	7.68509	0.867784	8.92054	0.804996	-1.23545	-12.9887	4.4138e-33	3.31439e-32
SATB1	8.52391	1.03732	9.88688	0.496216	-1.36297	-12.9842	4.60898e-33	3.45801e-32
CDH12	2.62267	1.28388	4.56277	1.53142	-1.9401	-12.9808	4.75697e-33	3.56752e-32
FLNC	7.37564	1.50626	9.46452	1.22327	-2.08888	-12.9769	4.93759e-33	3.69984e-32
RFTN2	5.84794	0.936894	7.18607	0.889303	-1.33813	-12.9737	5.09197e-33	3.81228e-32
LIMCH1	10.1283	1.1825	11.7091	0.717131	-1.58087	-12.9734	5.10695e-33	3.82188e-32
MAP3K15	0.878096	0.865656	2.16931	0.984792	-1.29121	-12.9721	5.17366e-33	3.87016e-32
KLF8	7.71573	1.06285	9.11609	0.539528	-1.40036	-12.9703	5.26297e-33	3.9353e-32
EVC2	6.15483	1.14708	7.64579	0.459174	-1.49096	-12.9701	5.2721e-33	3.94046e-32
IL12RB1	6.25798	1.20777	4.60802	0.892255	1.64996	12.959	5.86194e-33	4.37761e-32
SPOCK2	9.9319	1.13667	8.42462	0.638271	1.50728	12.9563	6.01437e-33	4.48764e-32
KRBA2	5.69737	0.822656	6.80199	0.521586	-1.10463	-12.9546	6.11423e-33	4.56023e-32
WDR86	4.63001	1.54713	6.76157	1.22078	-2.13155	-12.9512	6.31636e-33	4.70701e-32
VLDLR	8.00915	1.3405	9.85475	1.05274	-1.8456	-12.9485	6.47623e-33	4.82411e-32
DNMT3B	7.2936	1.13416	5.79432	0.623147	1.49929	12.9392	7.08189e-33	5.27081e-32
TRPM2	8.46987	1.01528	7.06658	0.819441	1.4033	12.9349	7.37974e-33	5.49018e-32
LRP8	7.4077	1.33551	5.66889	0.59004	1.7388	12.9343	7.41613e-33	5.51493e-32
NCRNA00219	7.8829	0.804822	8.99007	0.626724	-1.10717	-12.9326	7.5442e-33	5.6078e-32
SEMA3A	5.40546	1.12513	7.0079	1.07273	-1.60244	-12.9323	7.5644e-33	5.62045e-32
PRX	6.80265	1.09169	8.27836	0.753561	-1.47571	-12.932	7.58269e-33	5.63167e-32
MAGI2	6.99414	1.03502	8.33807	0.430025	-1.34393	-12.9304	7.70024e-33	5.71657e-32
LOC399815	3.59217	1.16406	2.0066	0.856125	1.58558	12.9275	7.91282e-33	5.87192e-32
ARHGAP26	8.70588	0.92414	9.91872	0.461314	-1.21283	-12.9274	7.92252e-33	5.87665e-32
ECHDC1	9.51982	0.847996	10.657	0.543478	-1.13715	-12.9248	8.11918e-33	6.01999e-32
C9orf142	8.65185	0.929353	7.37478	0.726073	1.27708	12.9205	8.46244e-33	6.27187e-32
NUDT1	7.97103	0.823513	6.86751	0.525327	1.10352	12.92	8.50494e-33	6.30072e-32
LOC92659	6.94435	1.0277	5.45583	1.0613	1.48852	12.9174	8.71775e-33	6.45567e-32
KCTD8	0.654833	0.842717	1.93411	1.03385	-1.27928	-12.917	8.74613e-33	6.47397e-32
IDO2	2.25505	1.15532	0.713846	0.716541	1.54121	12.9162	8.81809e-33	6.5245e-32
EPHB2	8.06226	0.928984	6.70187	1.00442	1.36039	12.91	9.35695e-33	6.9174e-32
ETV1	7.61615	0.955675	8.98416	0.938797	-1.36801	-12.9091	9.43255e-33	6.97037e-32
[truncated: 2,344 more rows]
